# Supplementary material for: Integrative Proteomic and Phosphoproteomic Analyses Revealed Complex Mechanisms Underlying Reproductive Diapause in Bombus terrestris Queens
Source: MDPI journal article supplement (doi:10.3390/insects13100862), 2022-09-23

**Supplementary Figure S5: GO analysis of DEPs in each comparable group.**

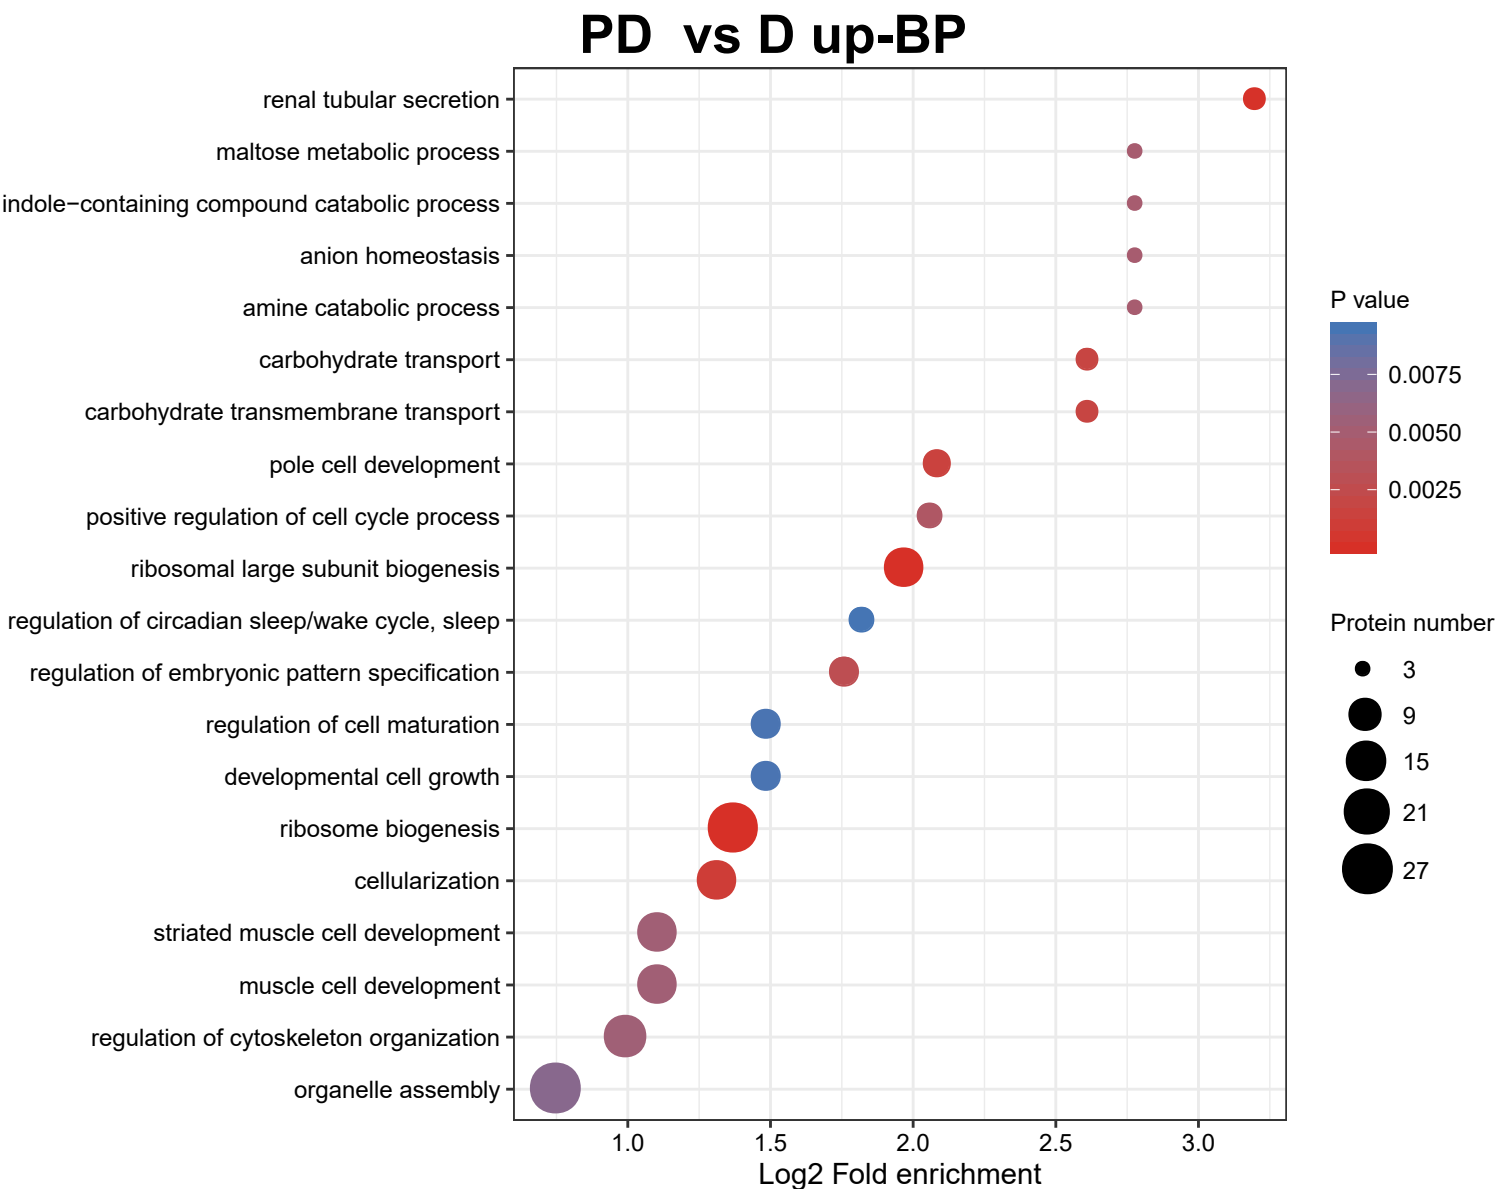

# PD vs D up-CC

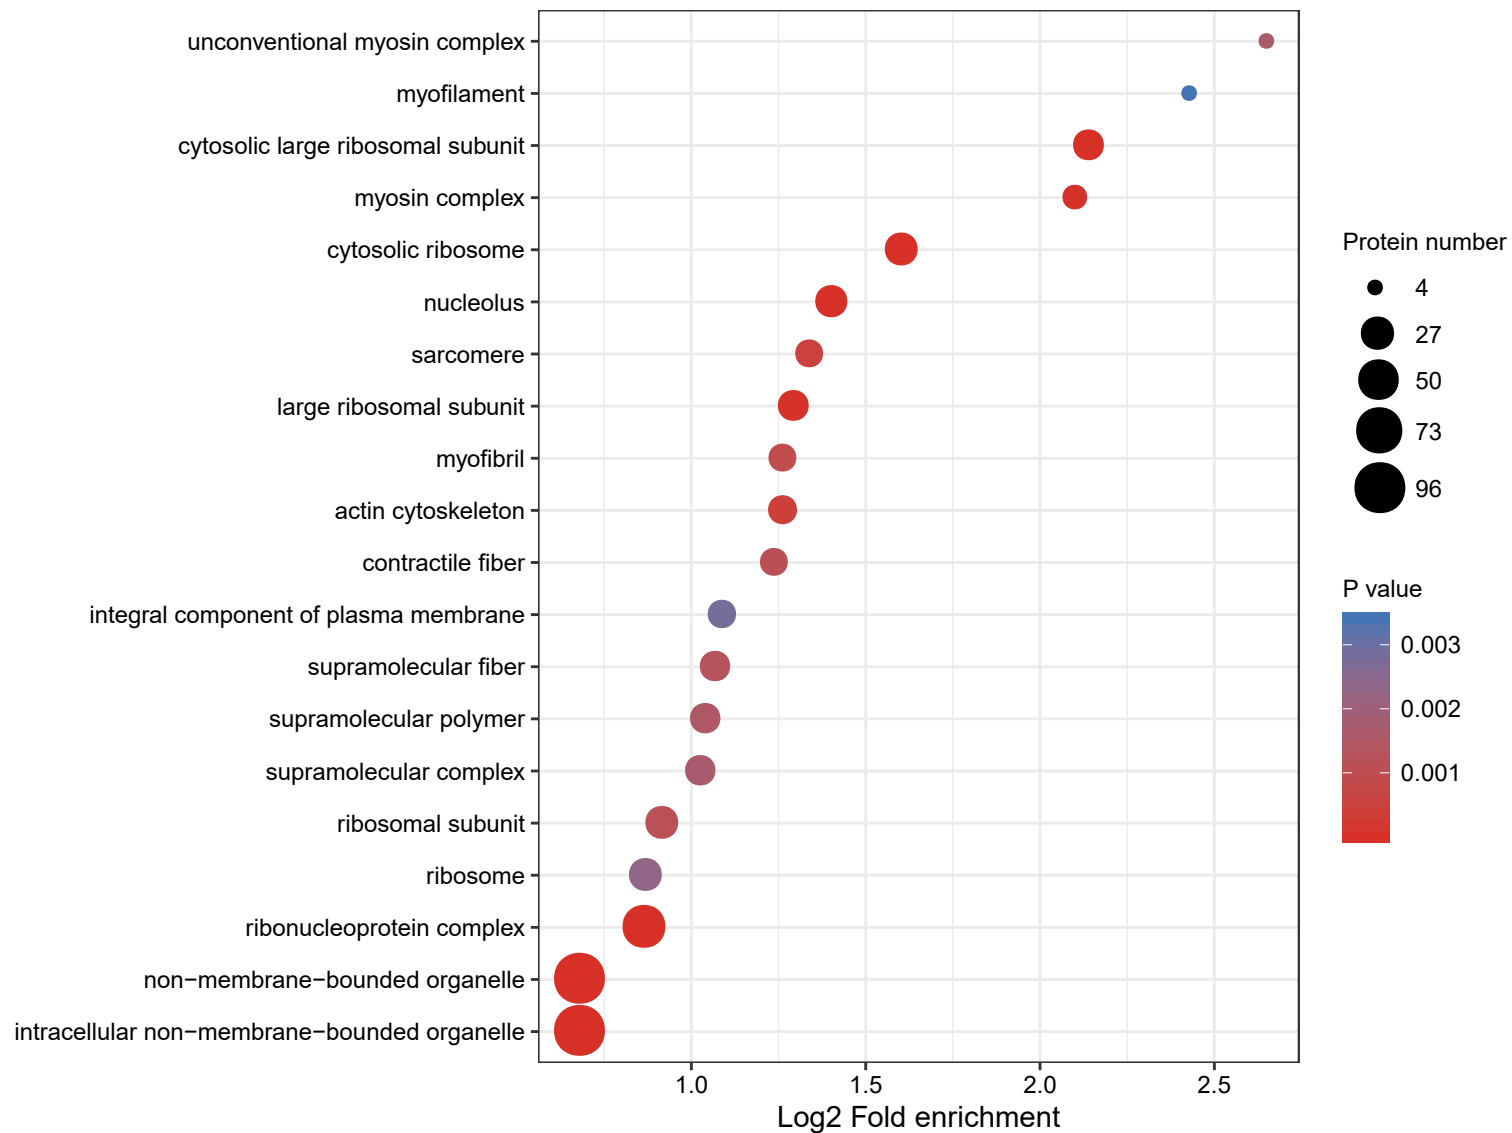

# PD vs D up-MF

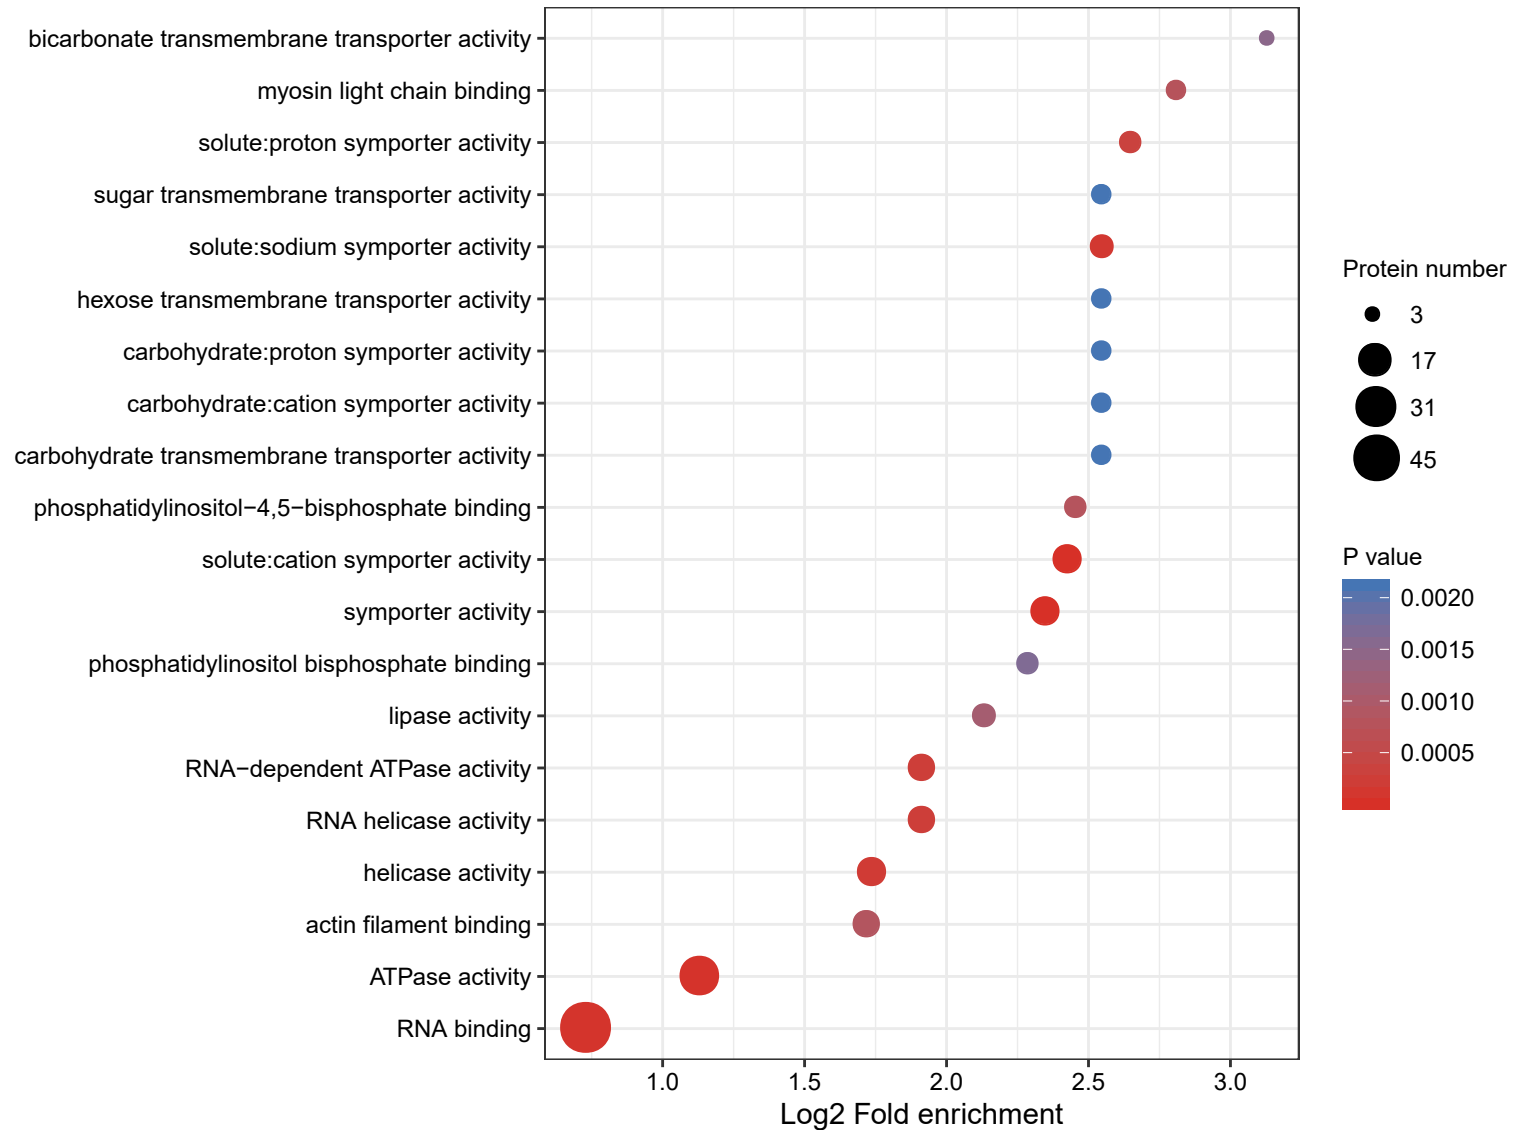

# PD vs D down-BP

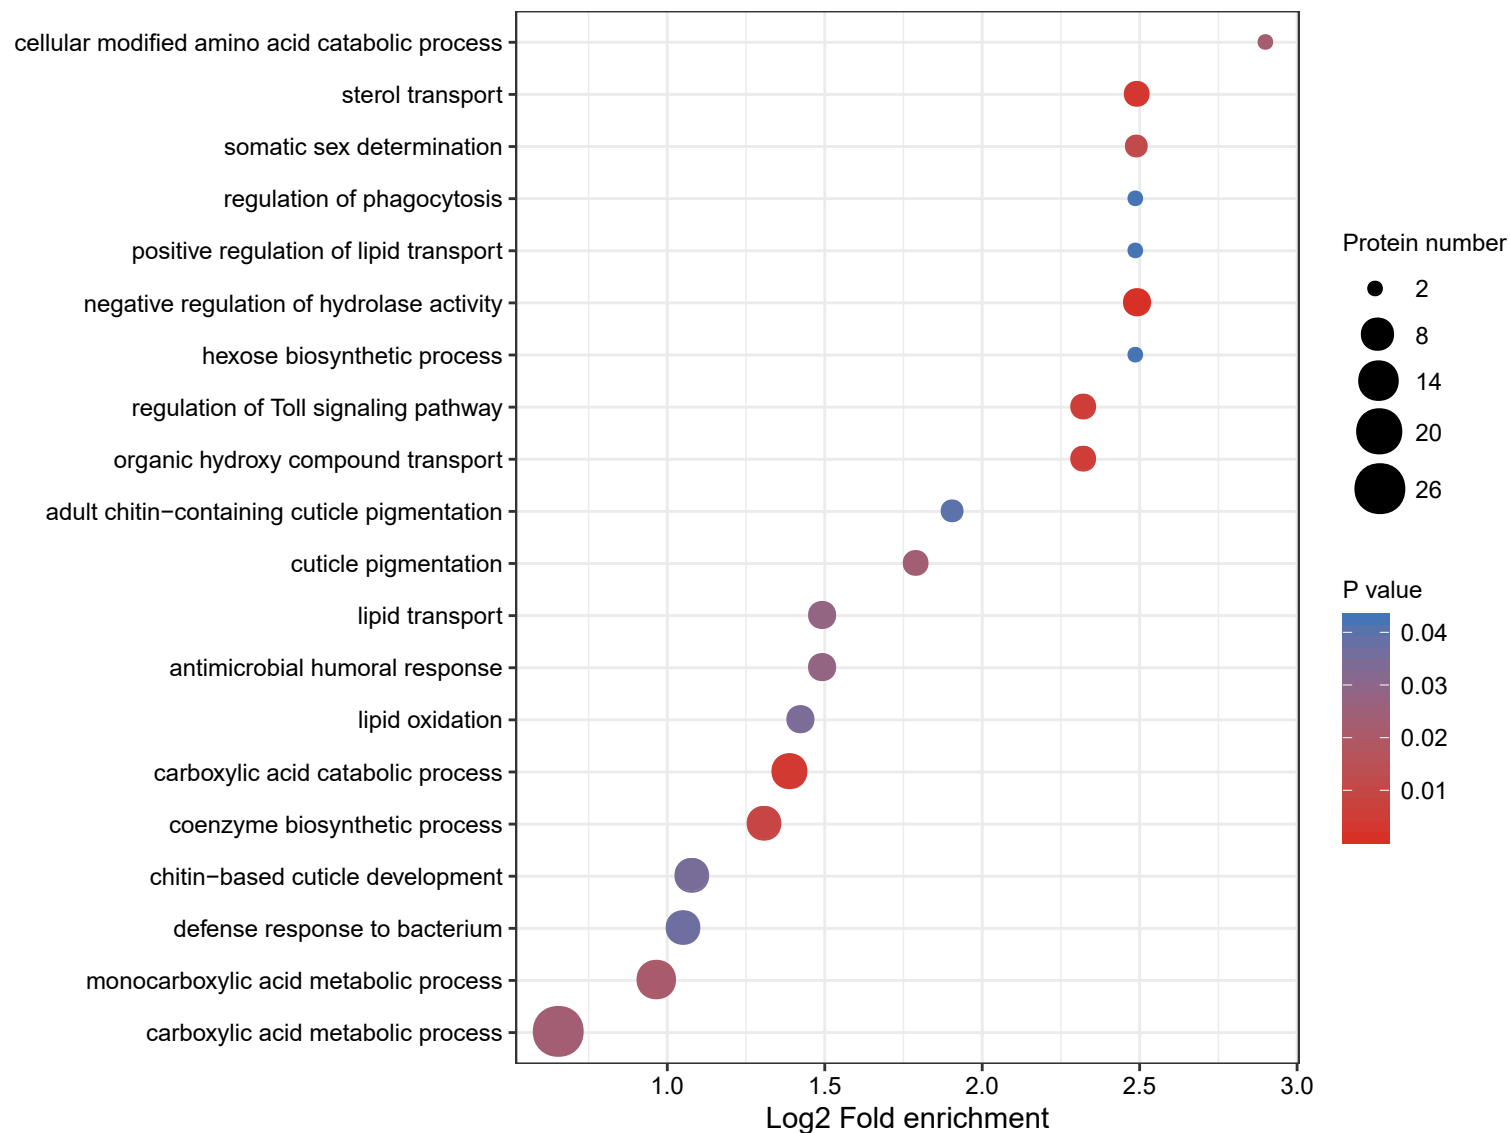

# PD vs D down-CC

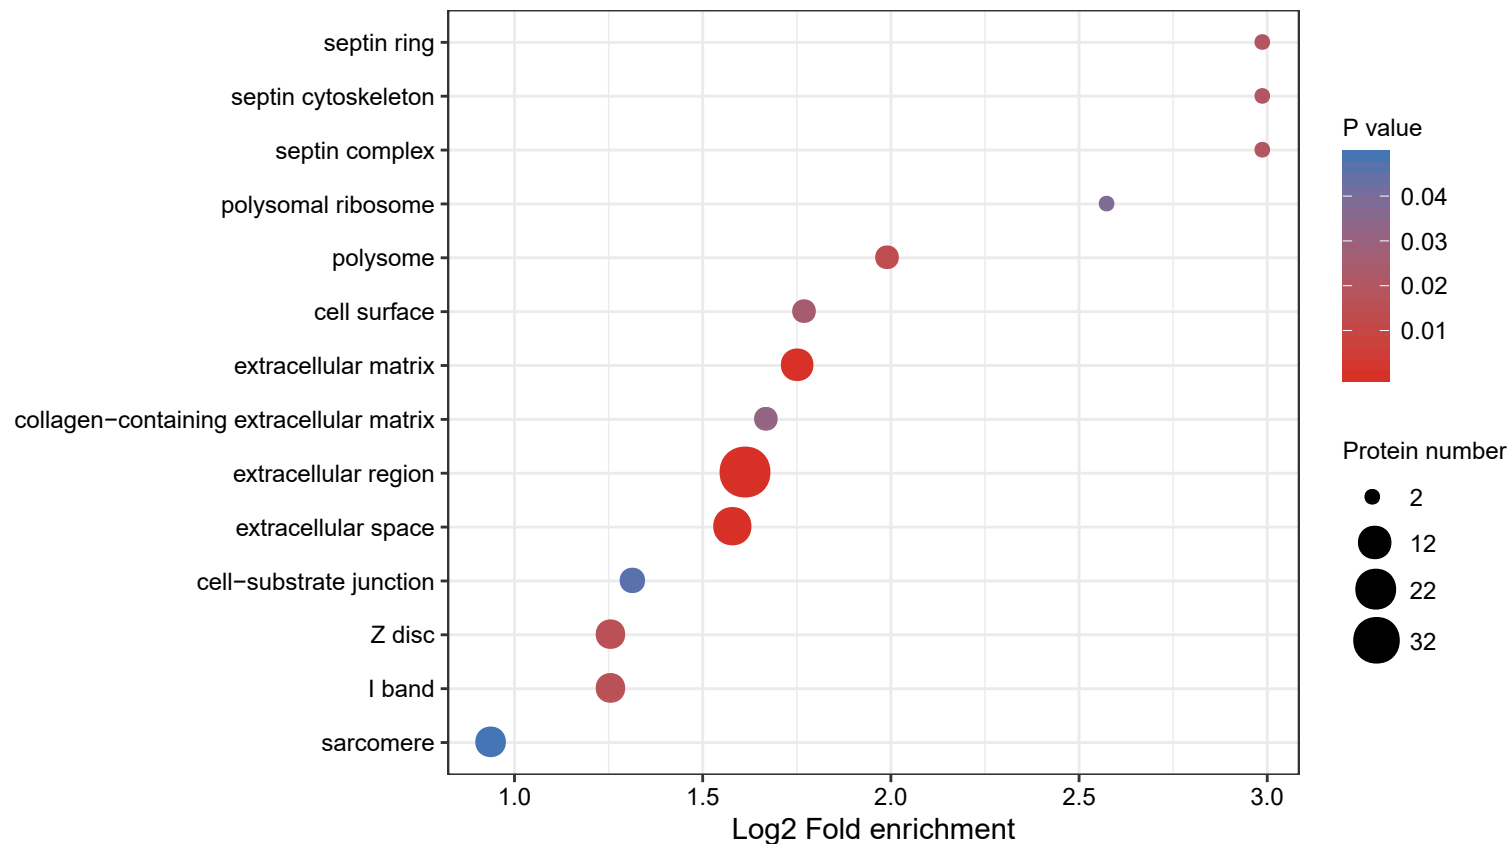

# PD vs D down-MF

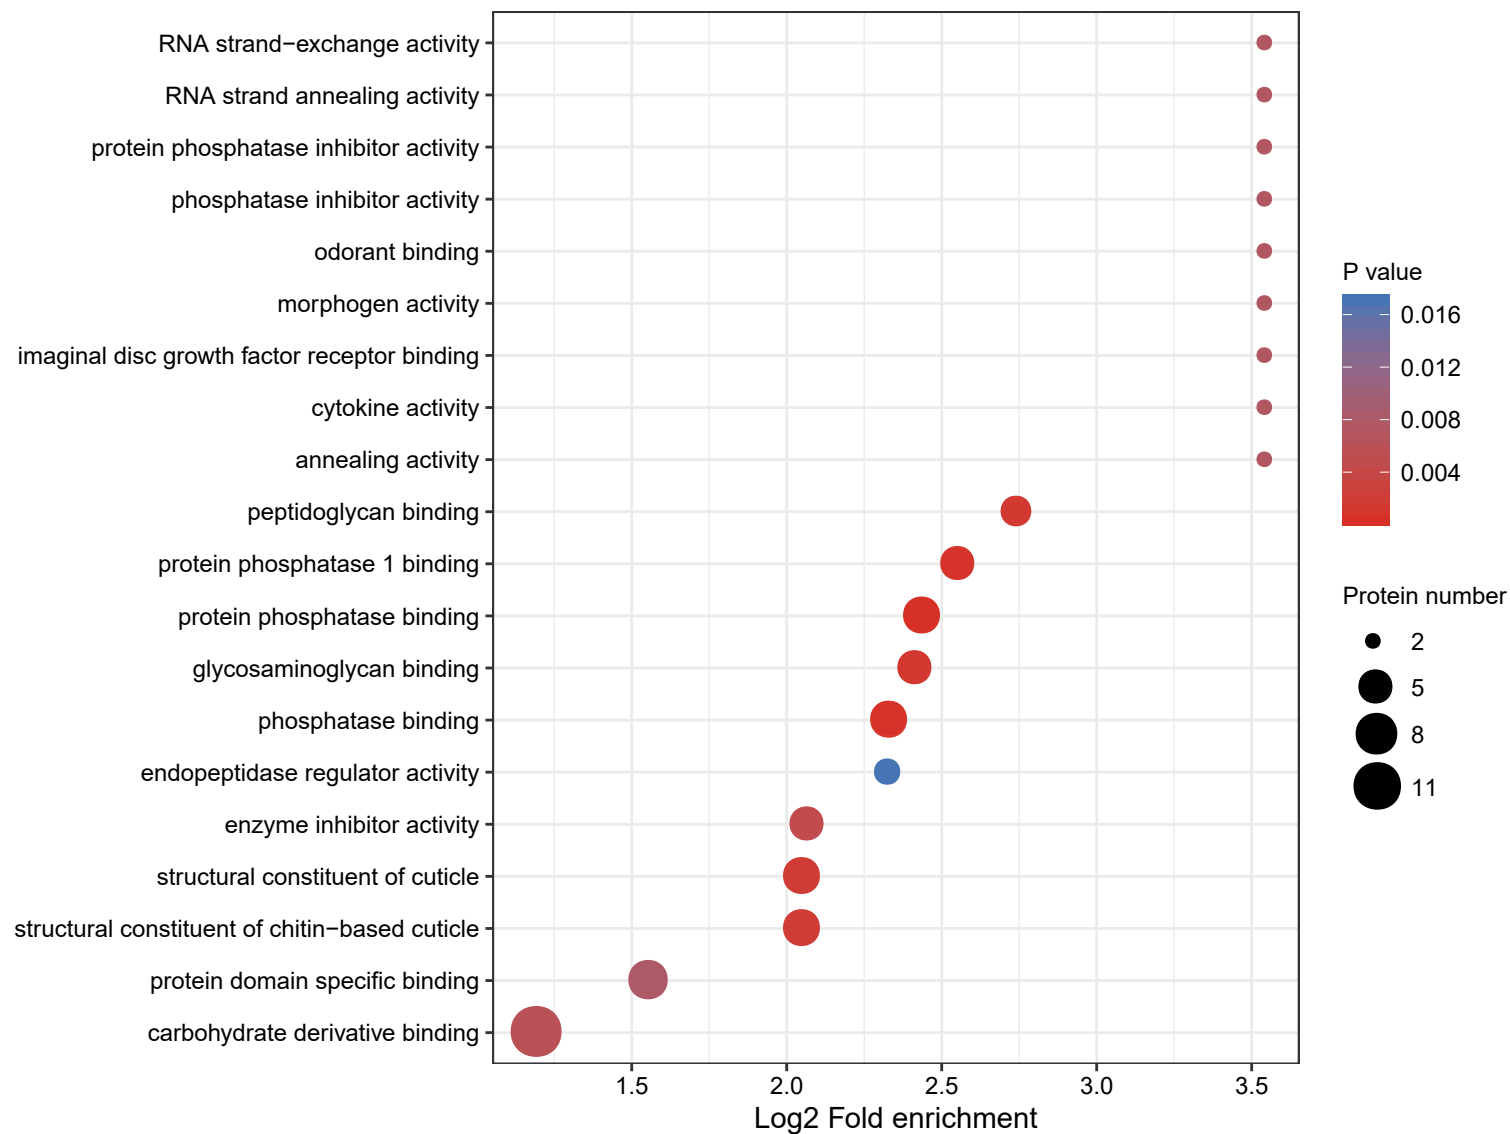

# FPD vs PD up-BP

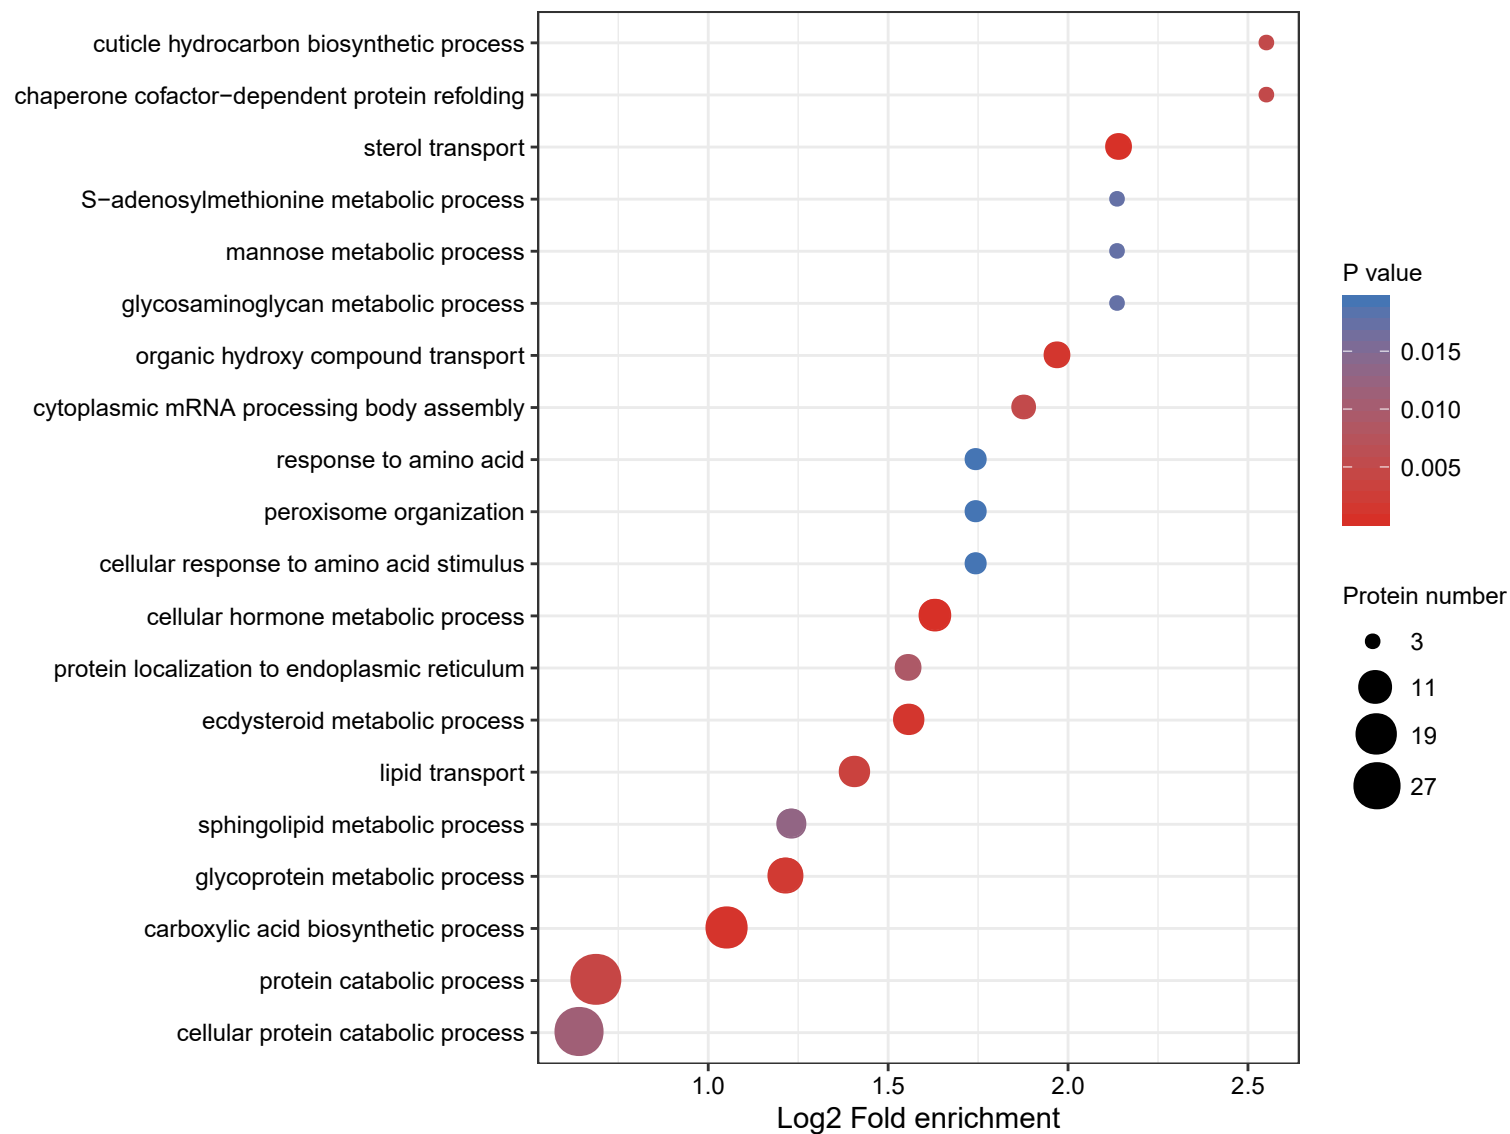

# FPD vs PD up-CC

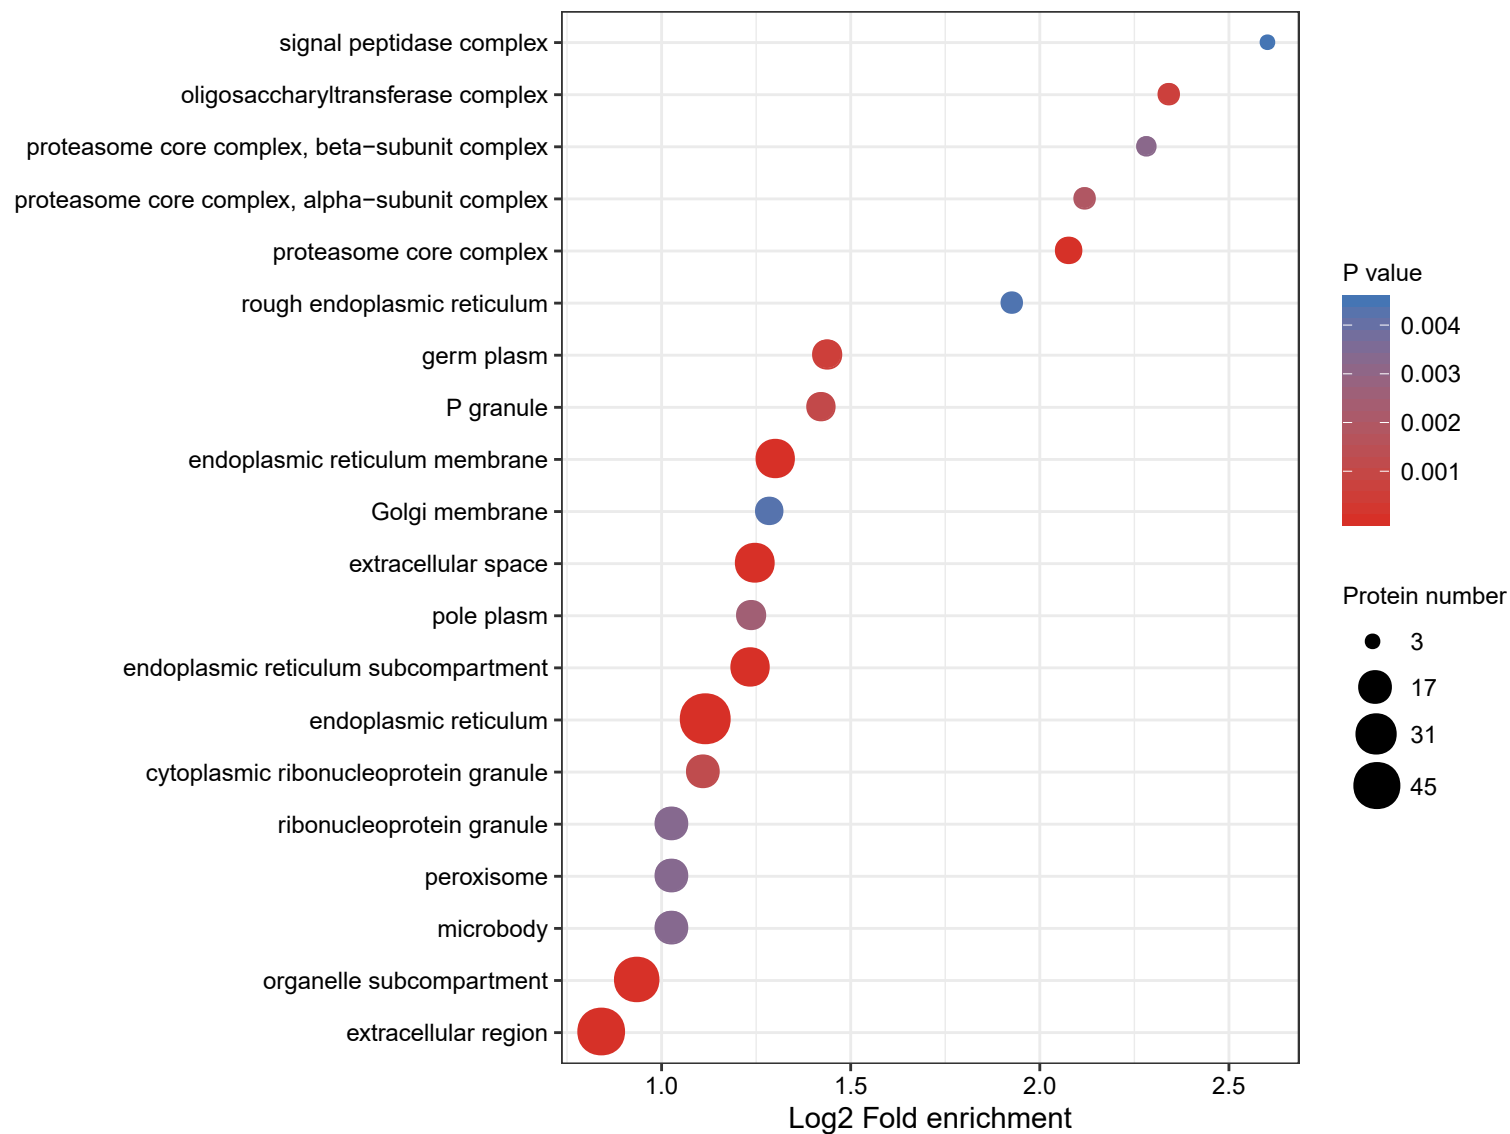

# FPD vs PD up-MF

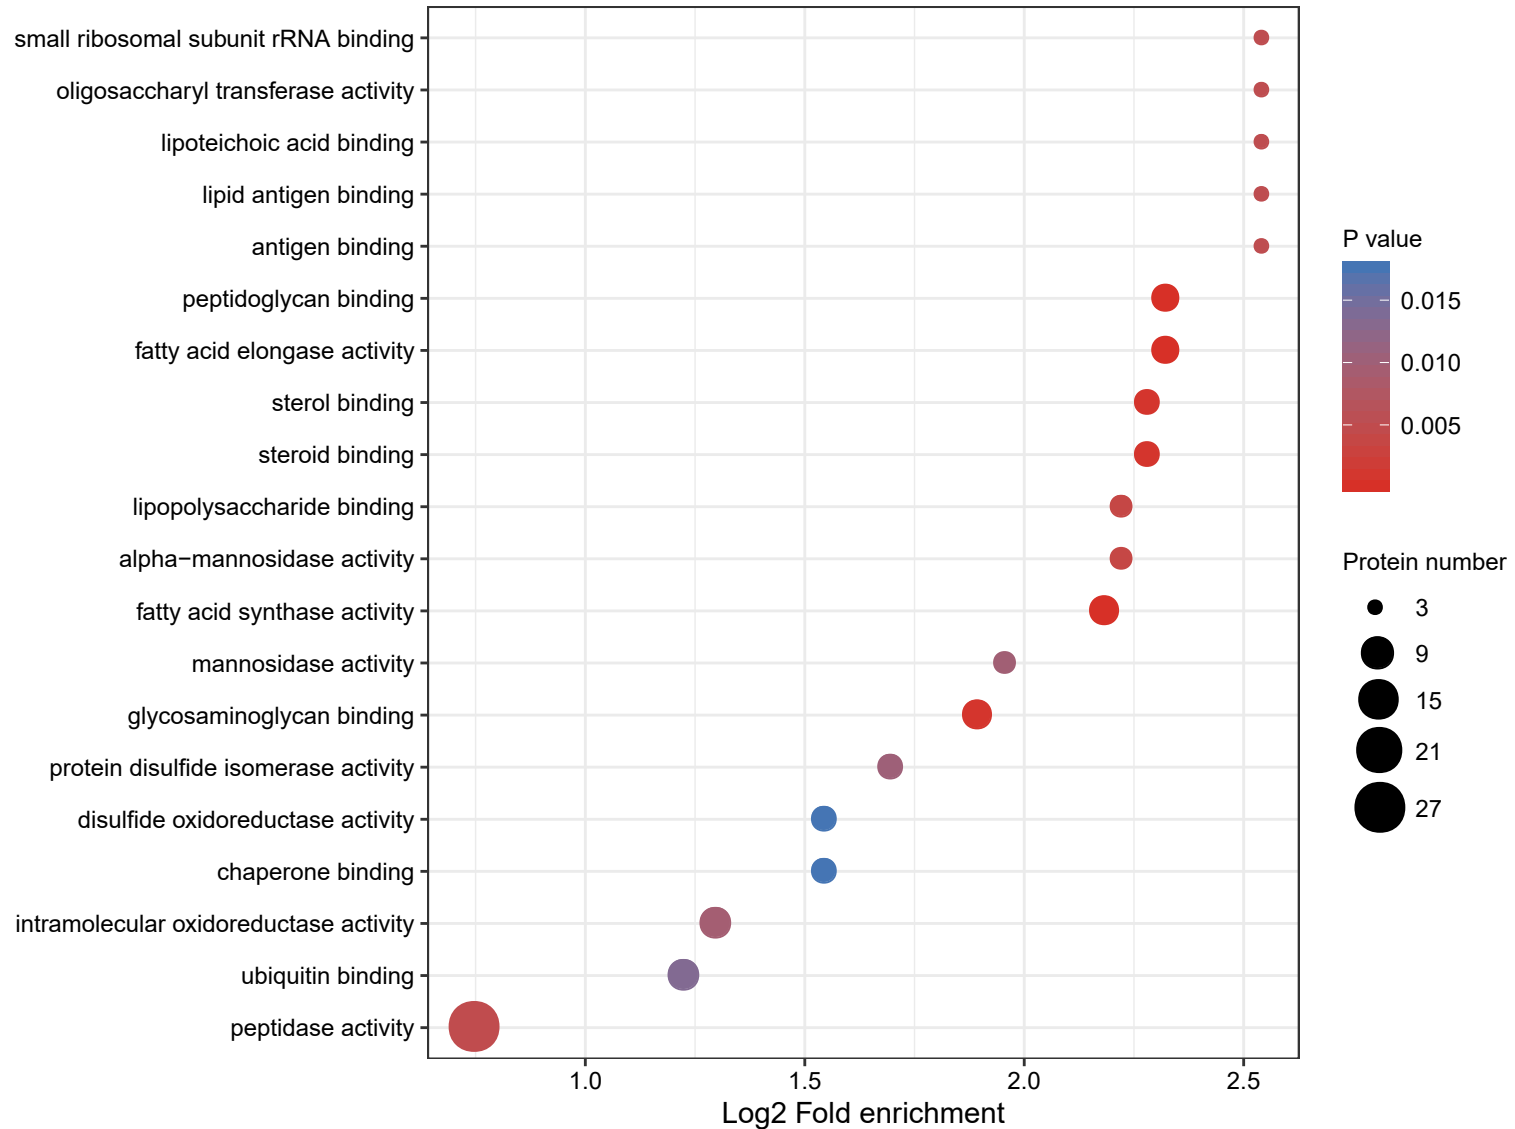

# FPD vs PD down-BP

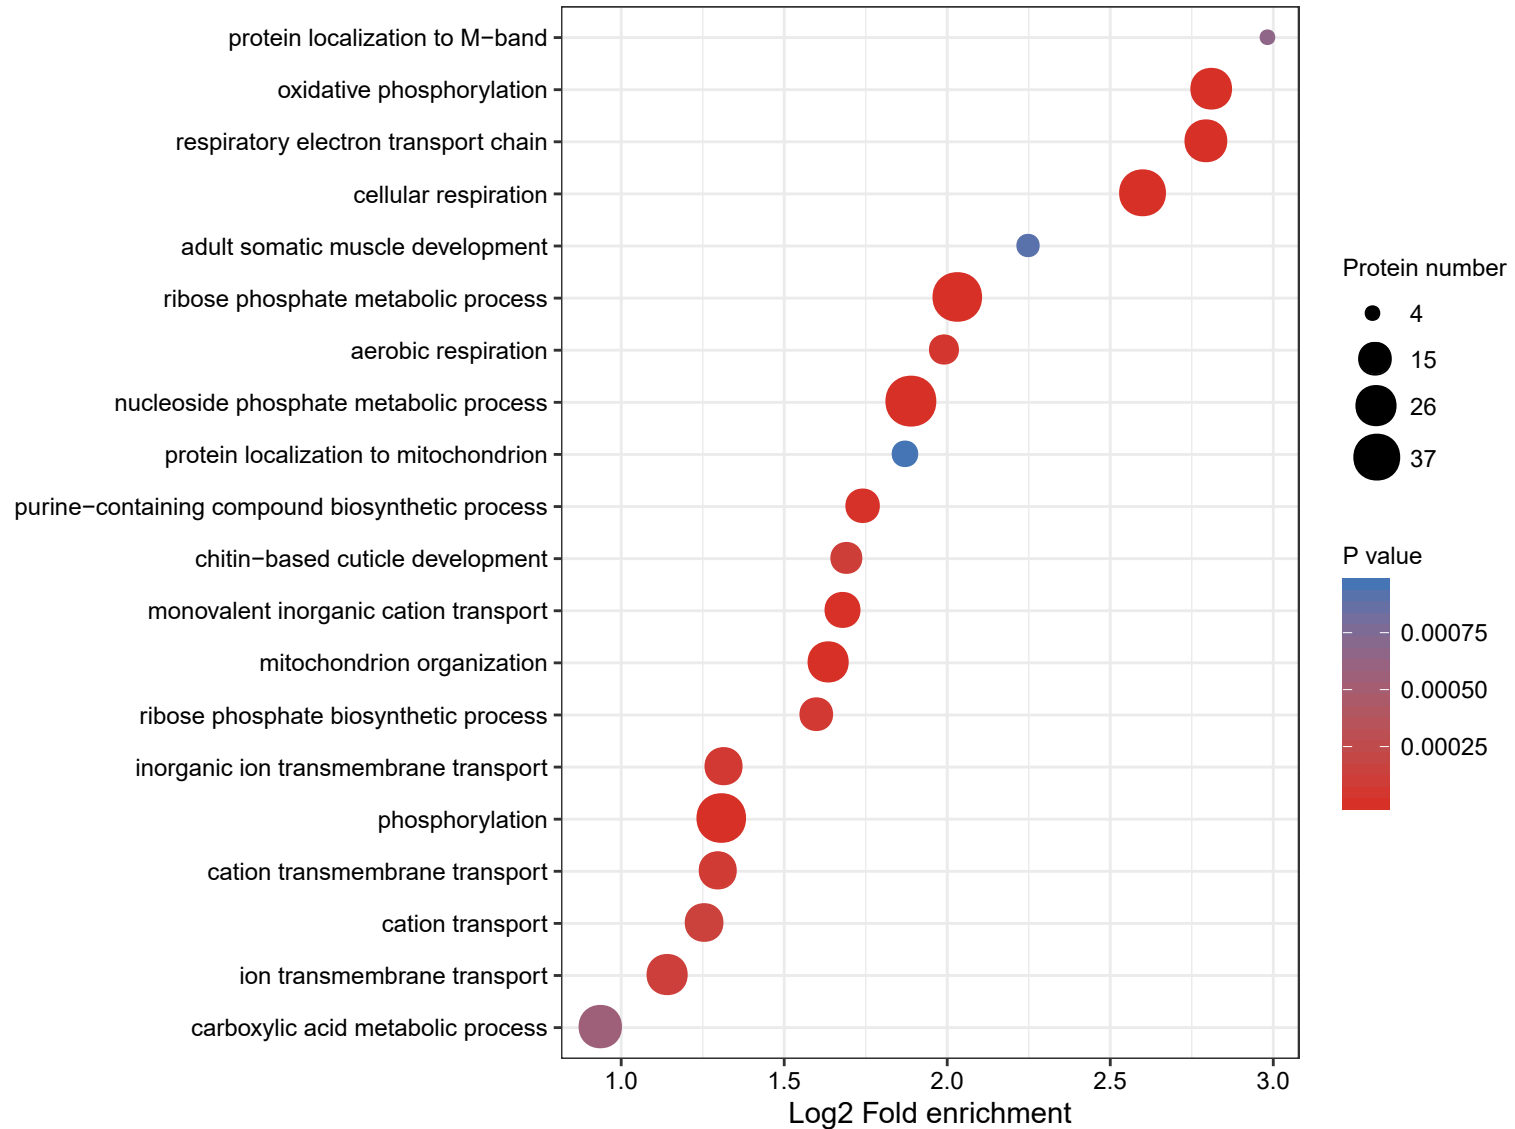

# FPD vs PD down-CC

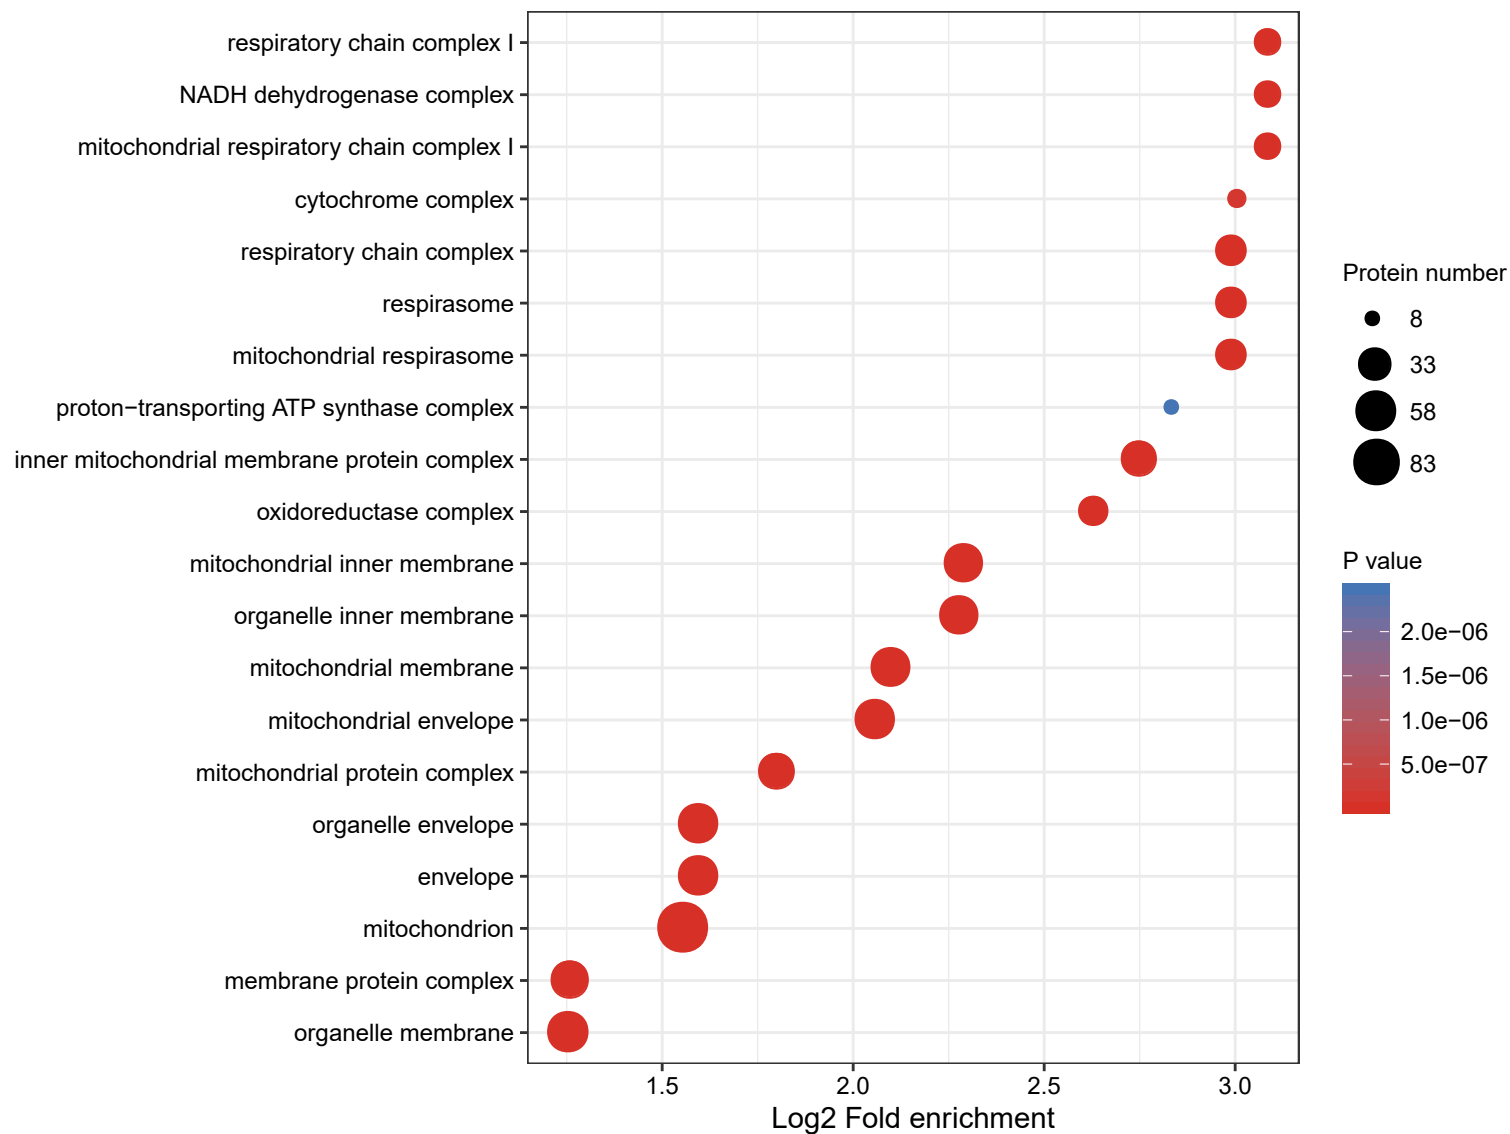

# FPD vs PD down-MF

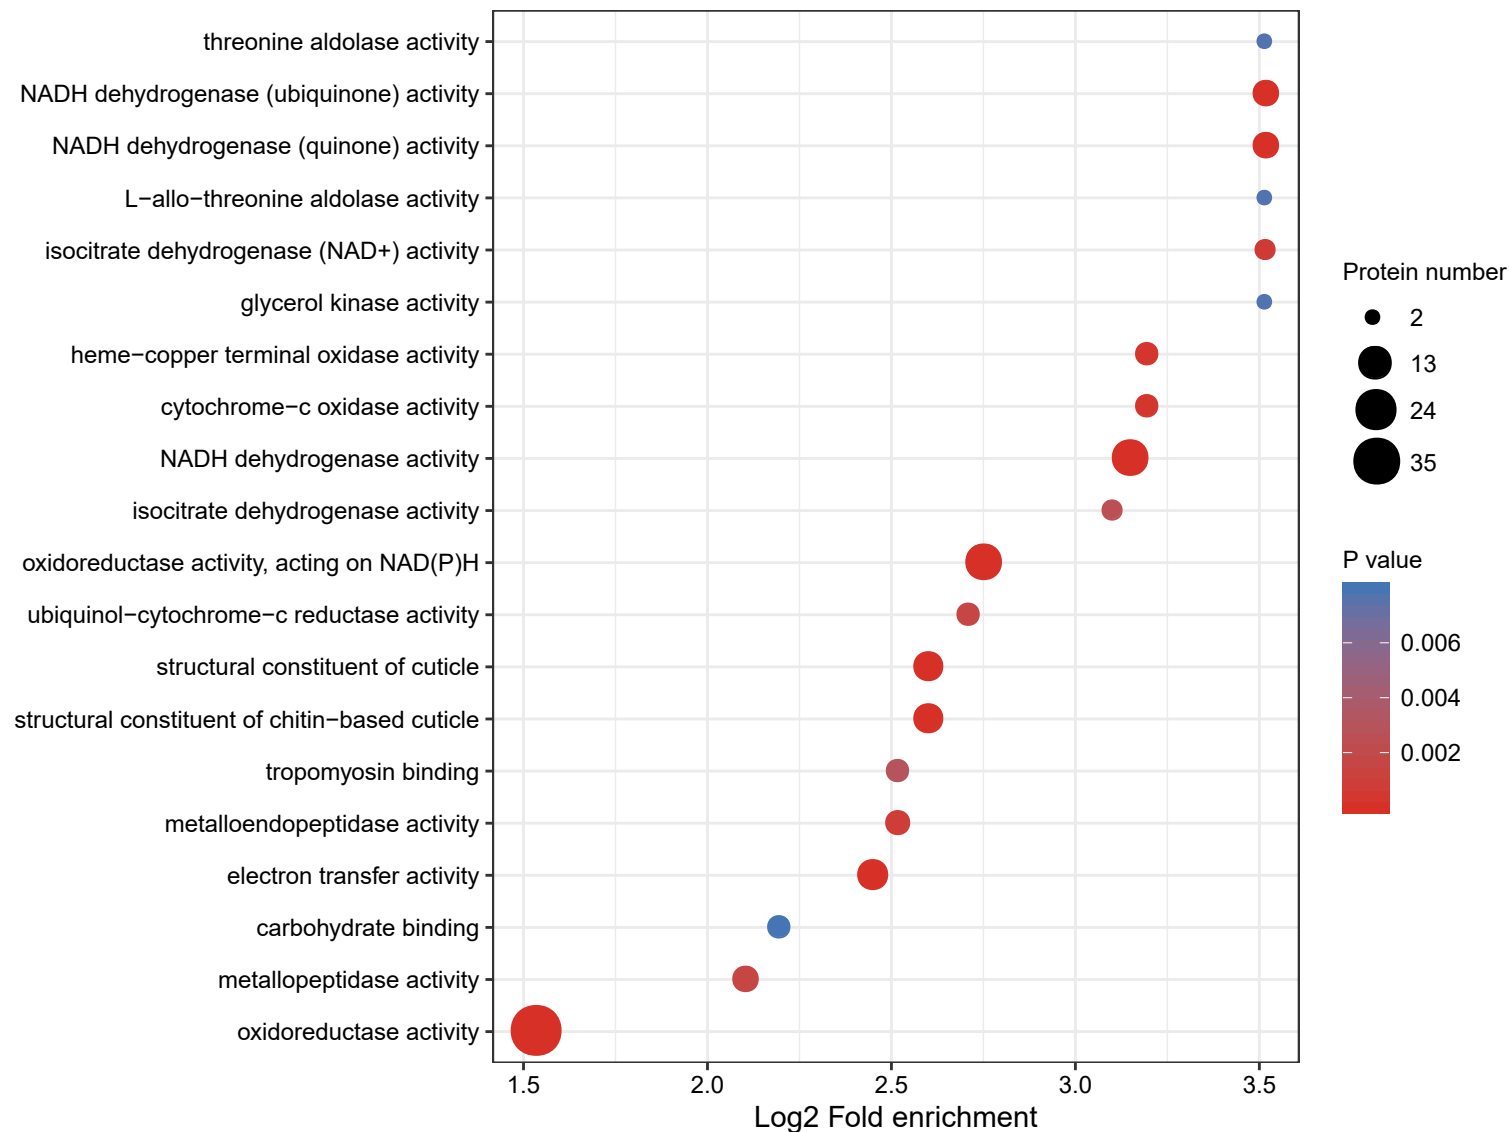

# FPD vs D up-BP

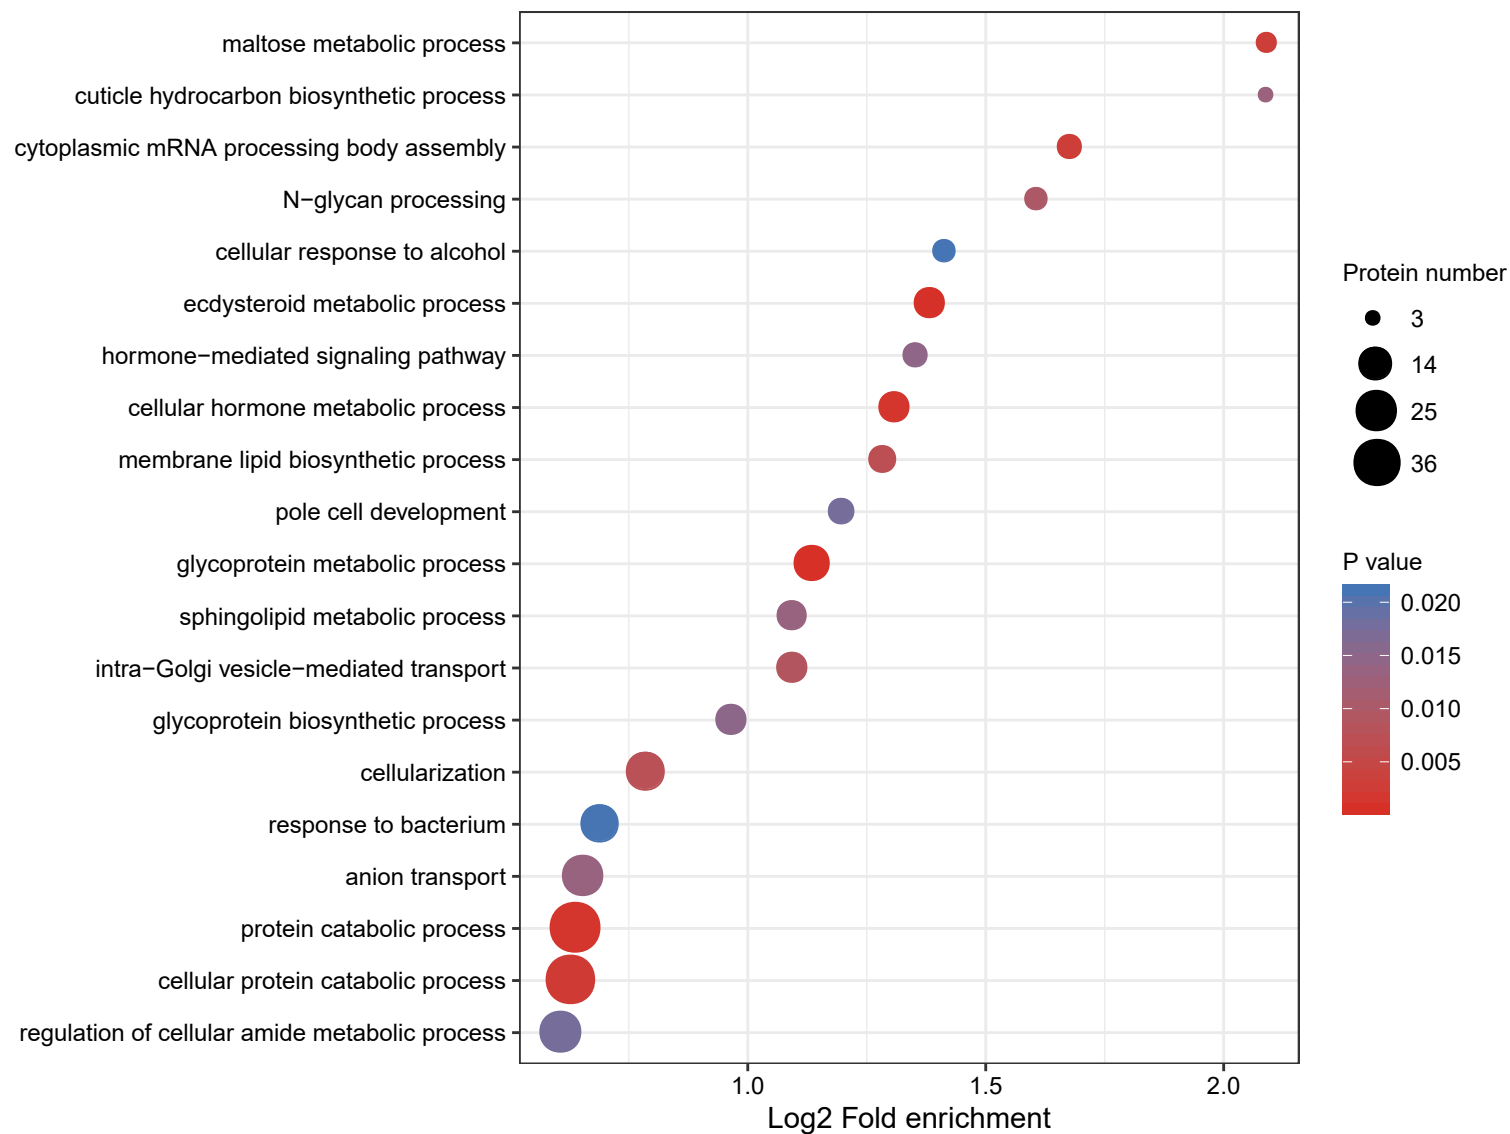

# FPD vs D up-CC

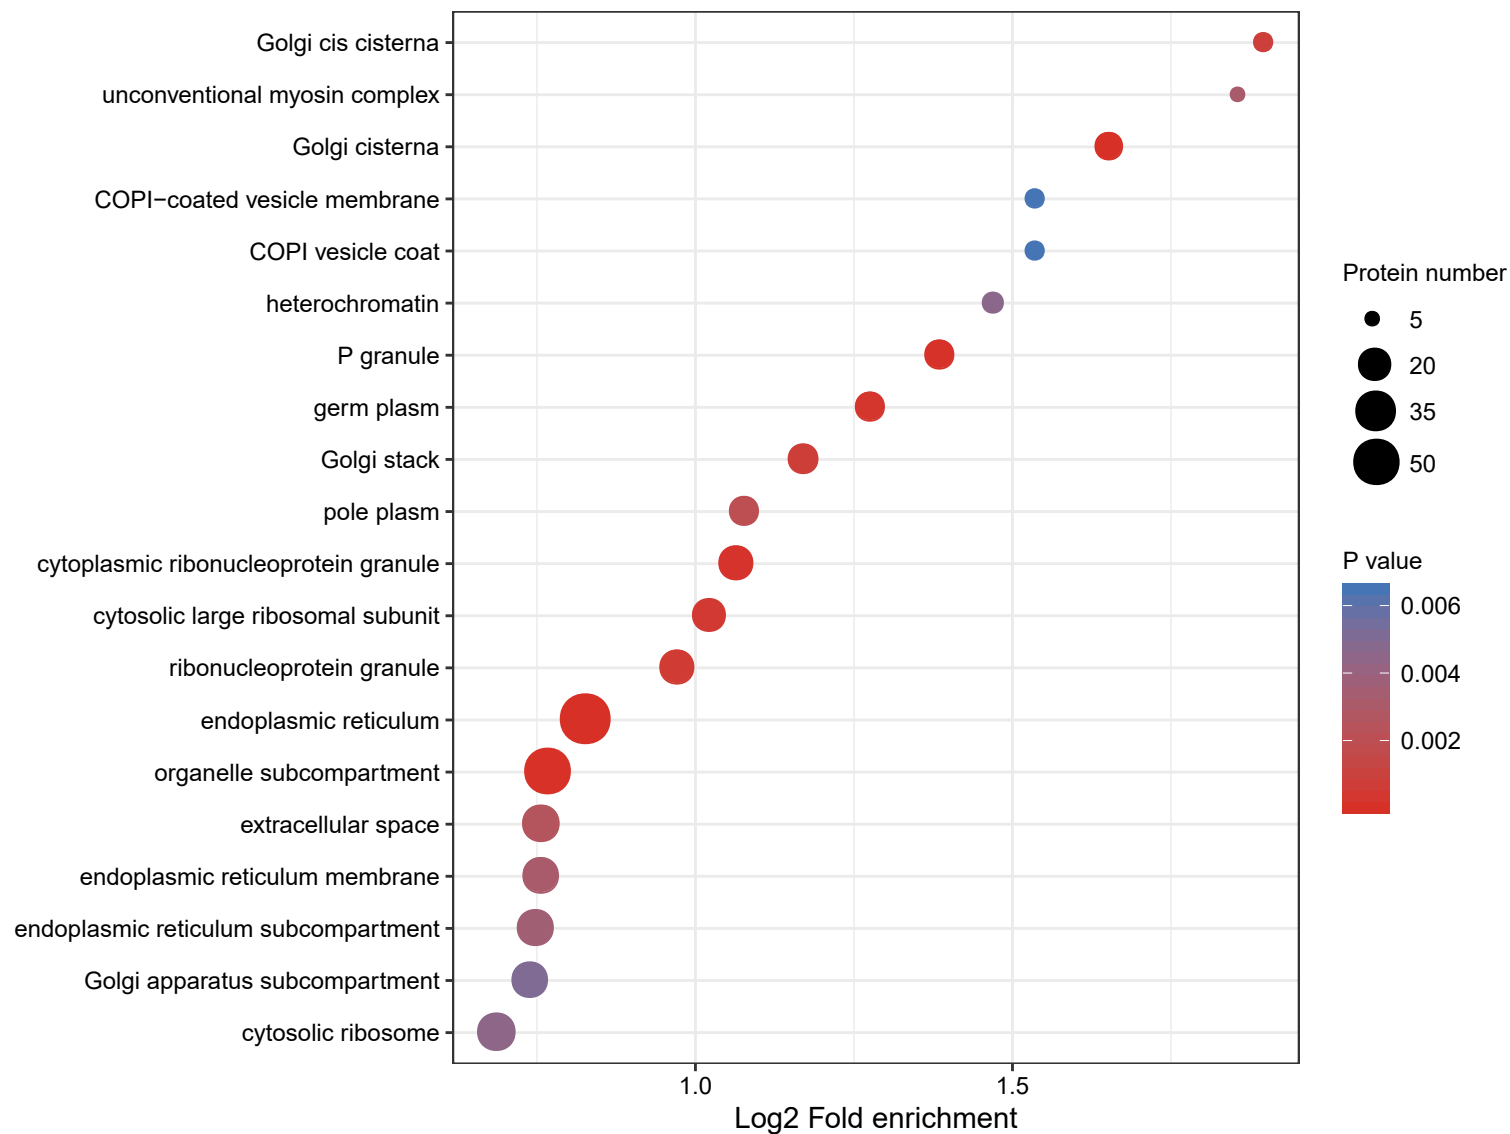

# FPD vs D up-MF

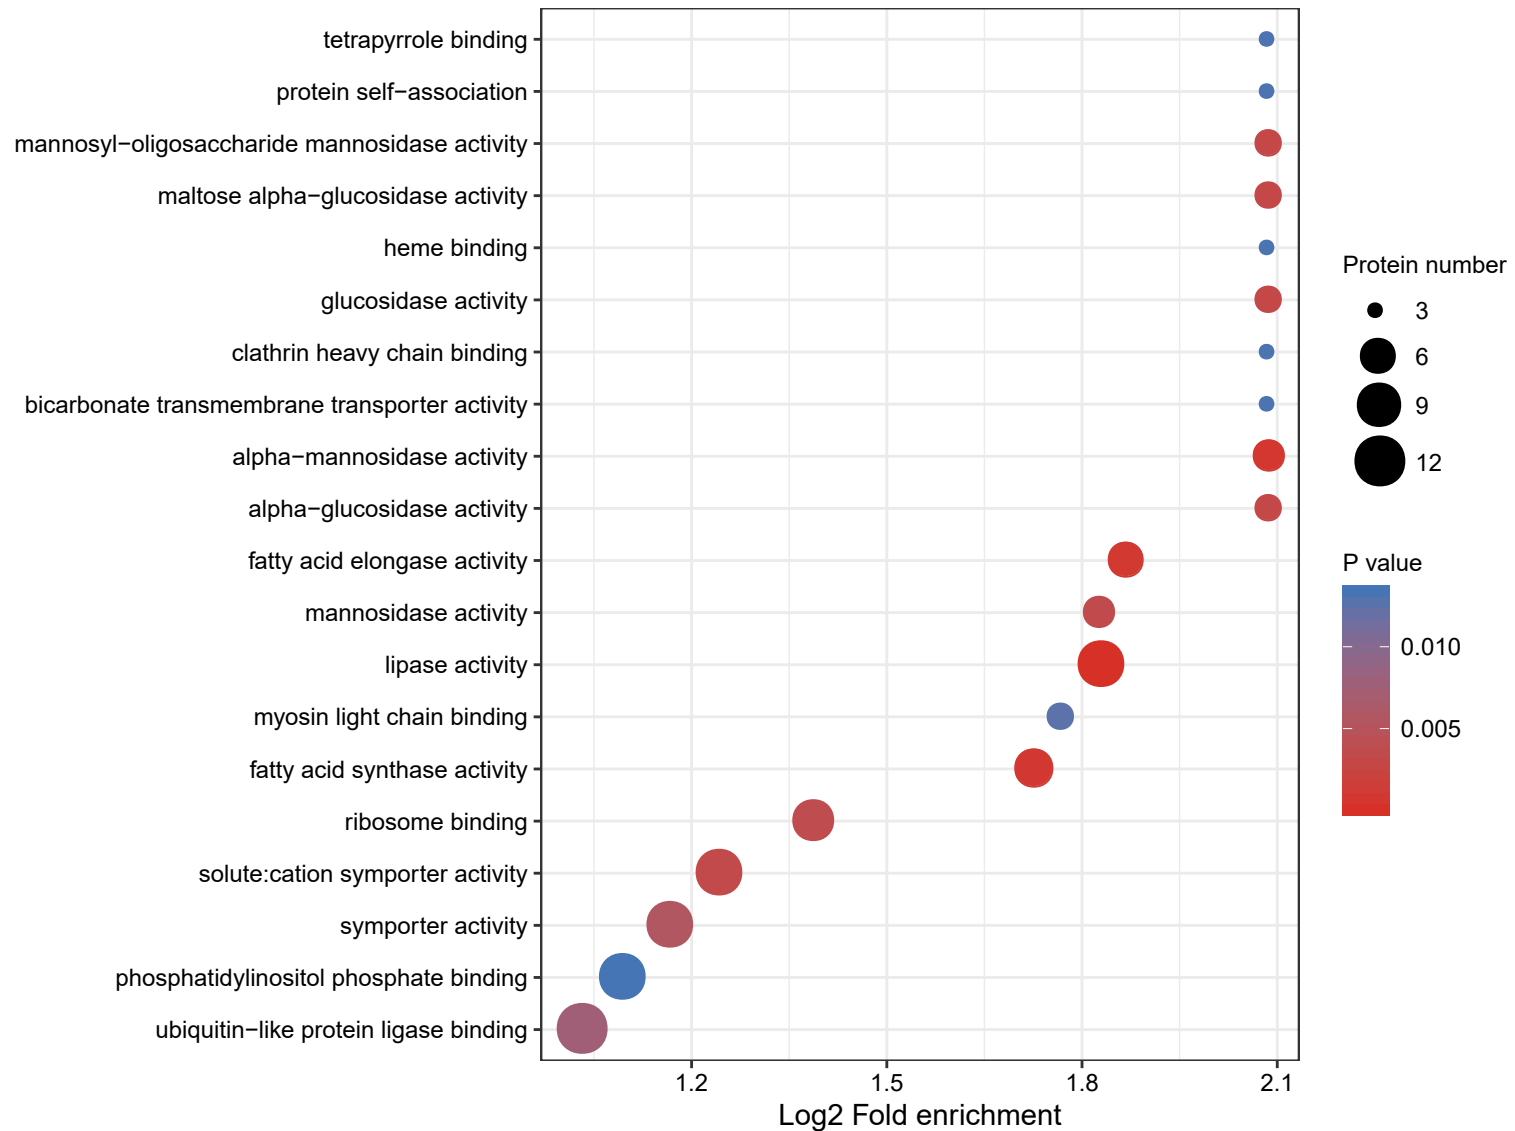

# FPD vs D down-BP

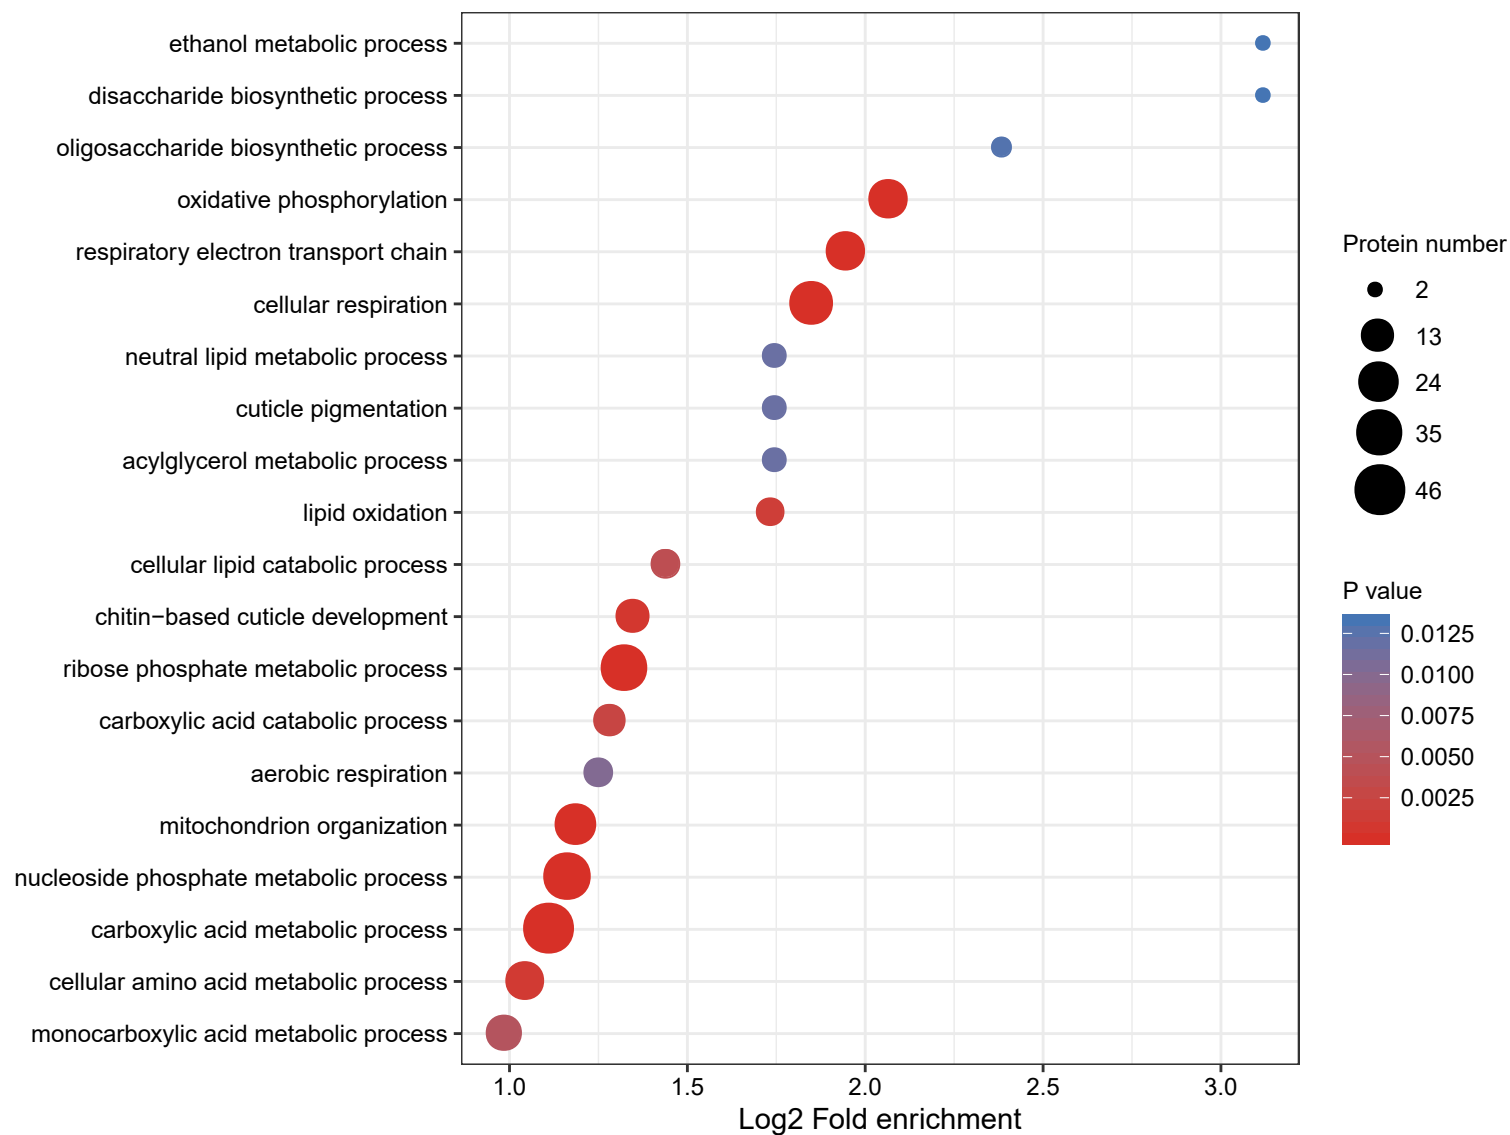

# FPD vs D down-CC

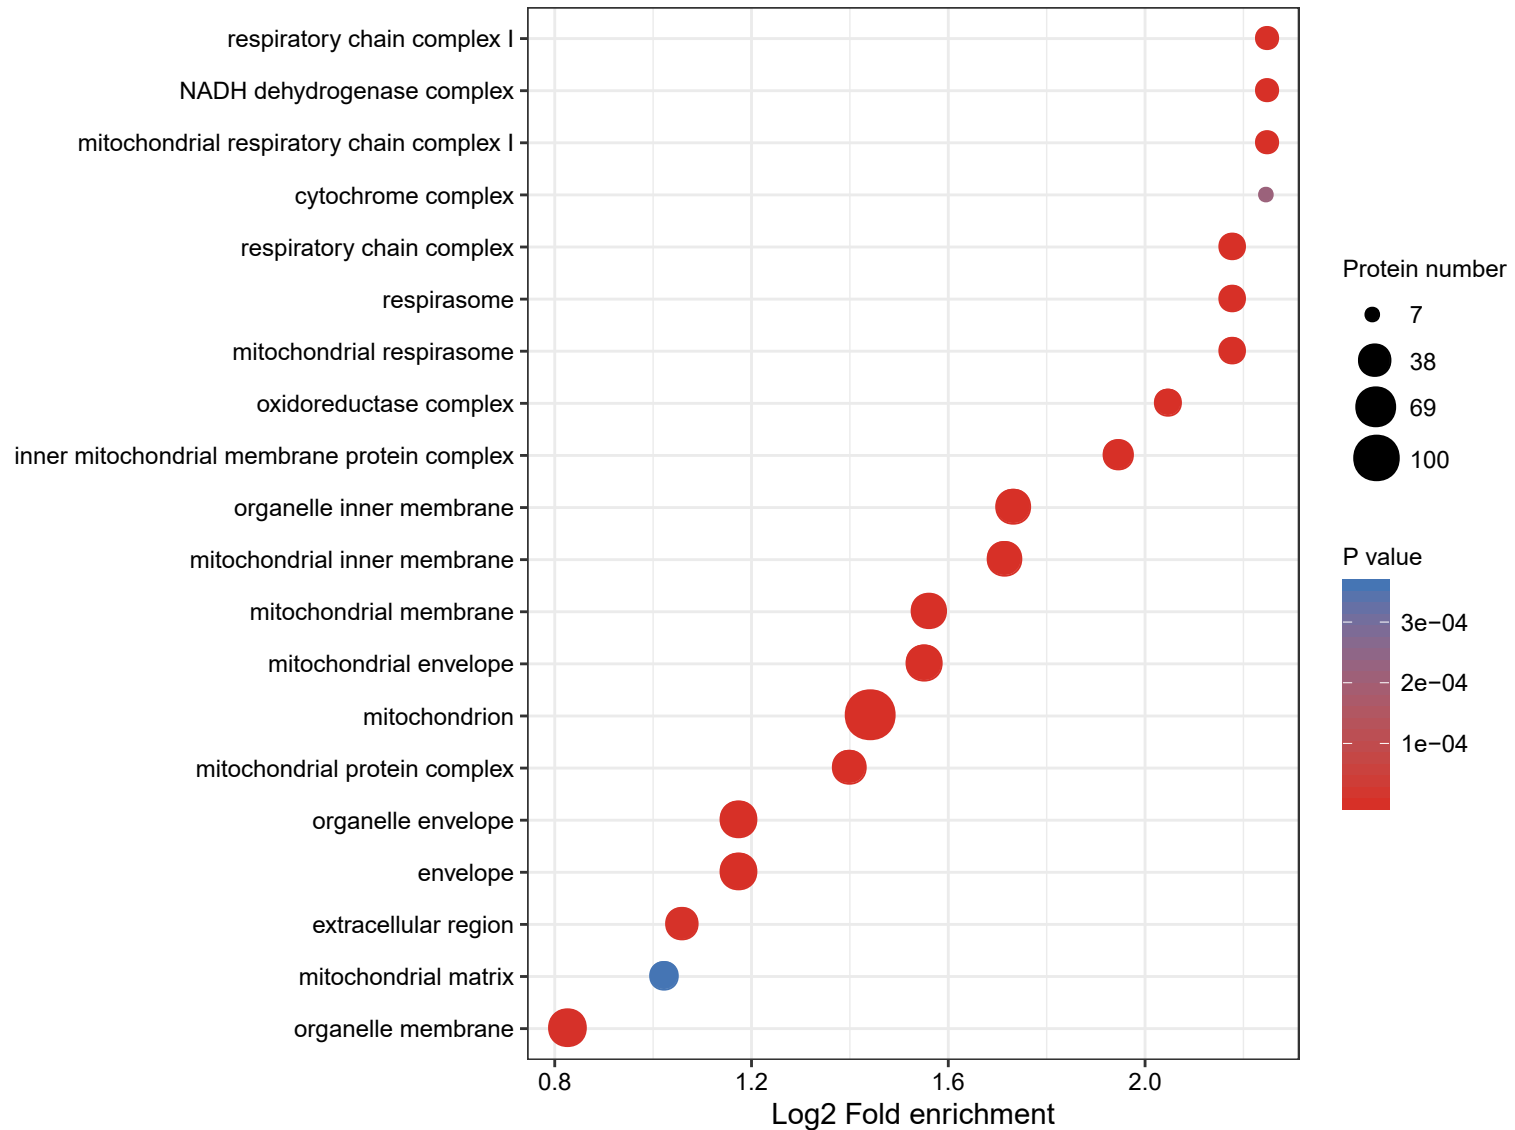

# FPD vs D down-MF

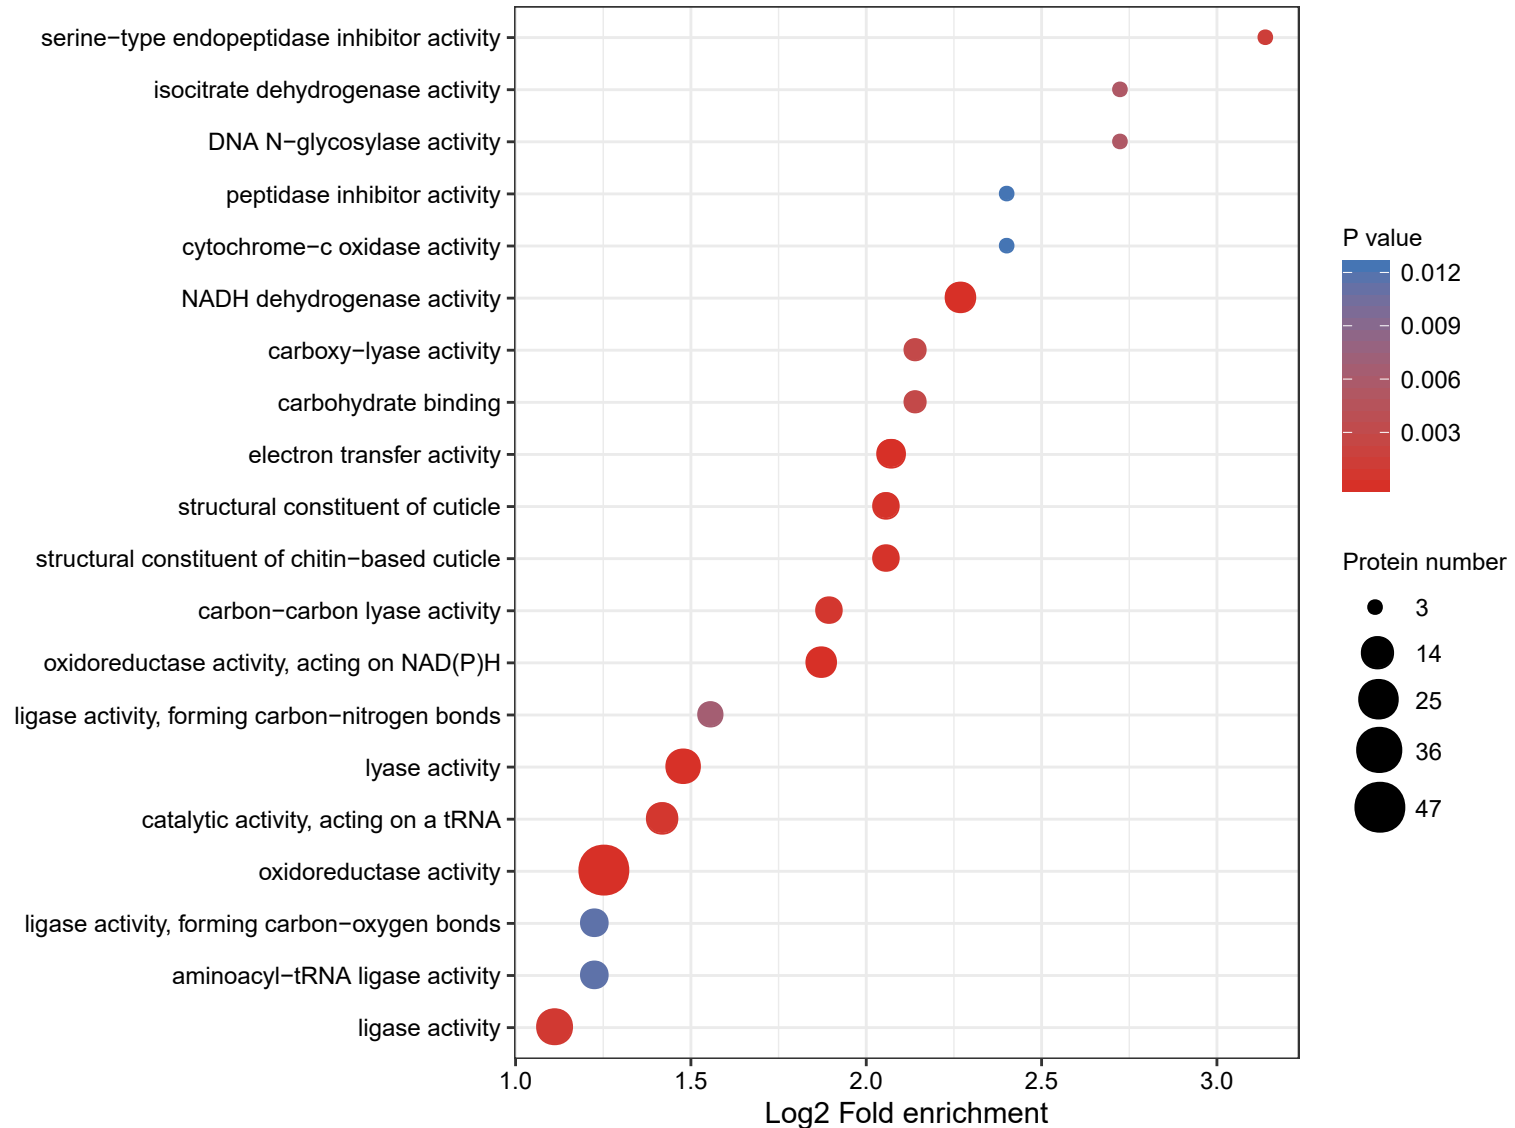

Supplement: s1 [file s1]
