# Supplementary material for: Integrative Proteomic and Phosphoproteomic Analyses Revealed Complex Mechanisms Underlying Reproductive Diapause in Bombus terrestris Queens
Source: MDPI journal article supplement (doi:10.3390/insects13100862), 2022-09-23

# Supplementary Figure S9: Protein domain analysis of DEPPs in each comparable group.

## PD vs D up-Domain

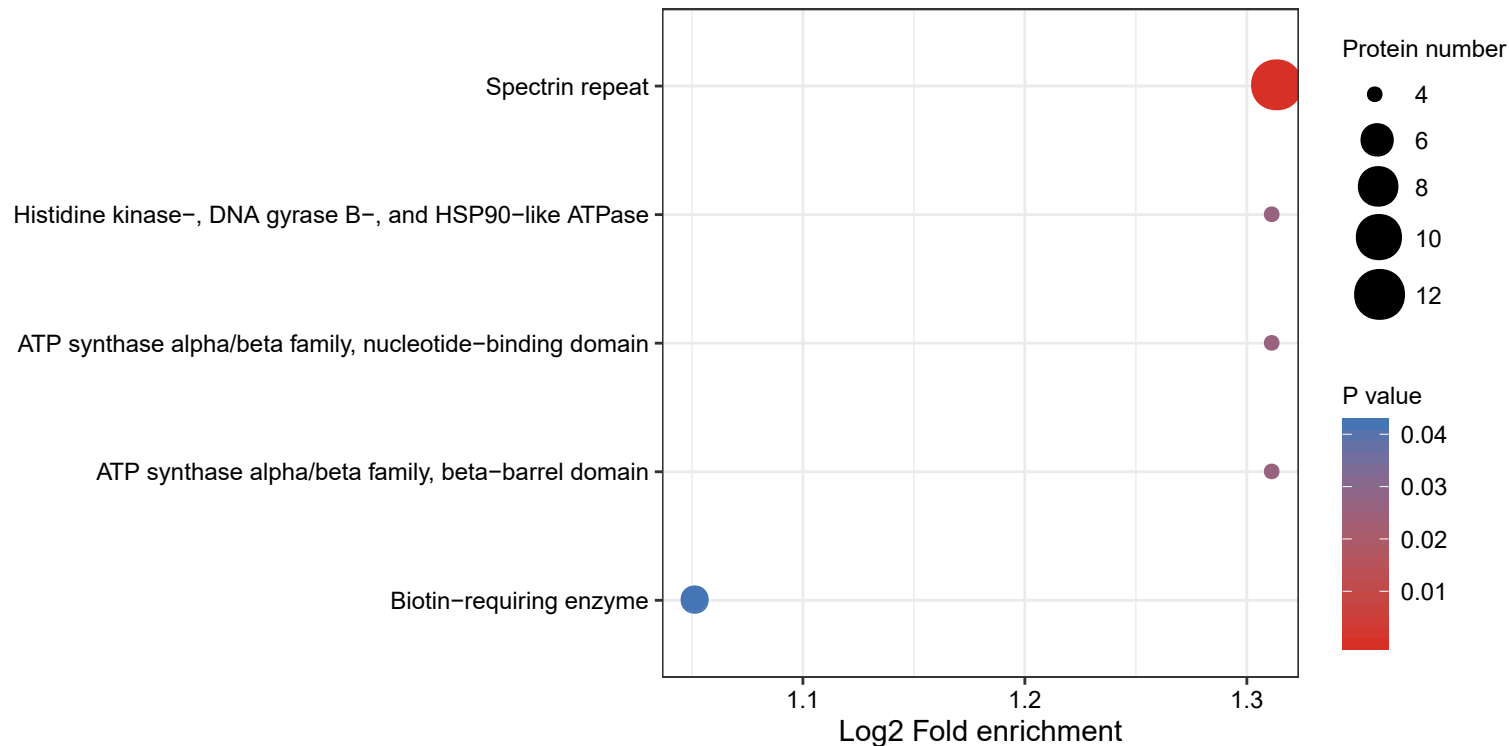

# PD vs D down-Domain

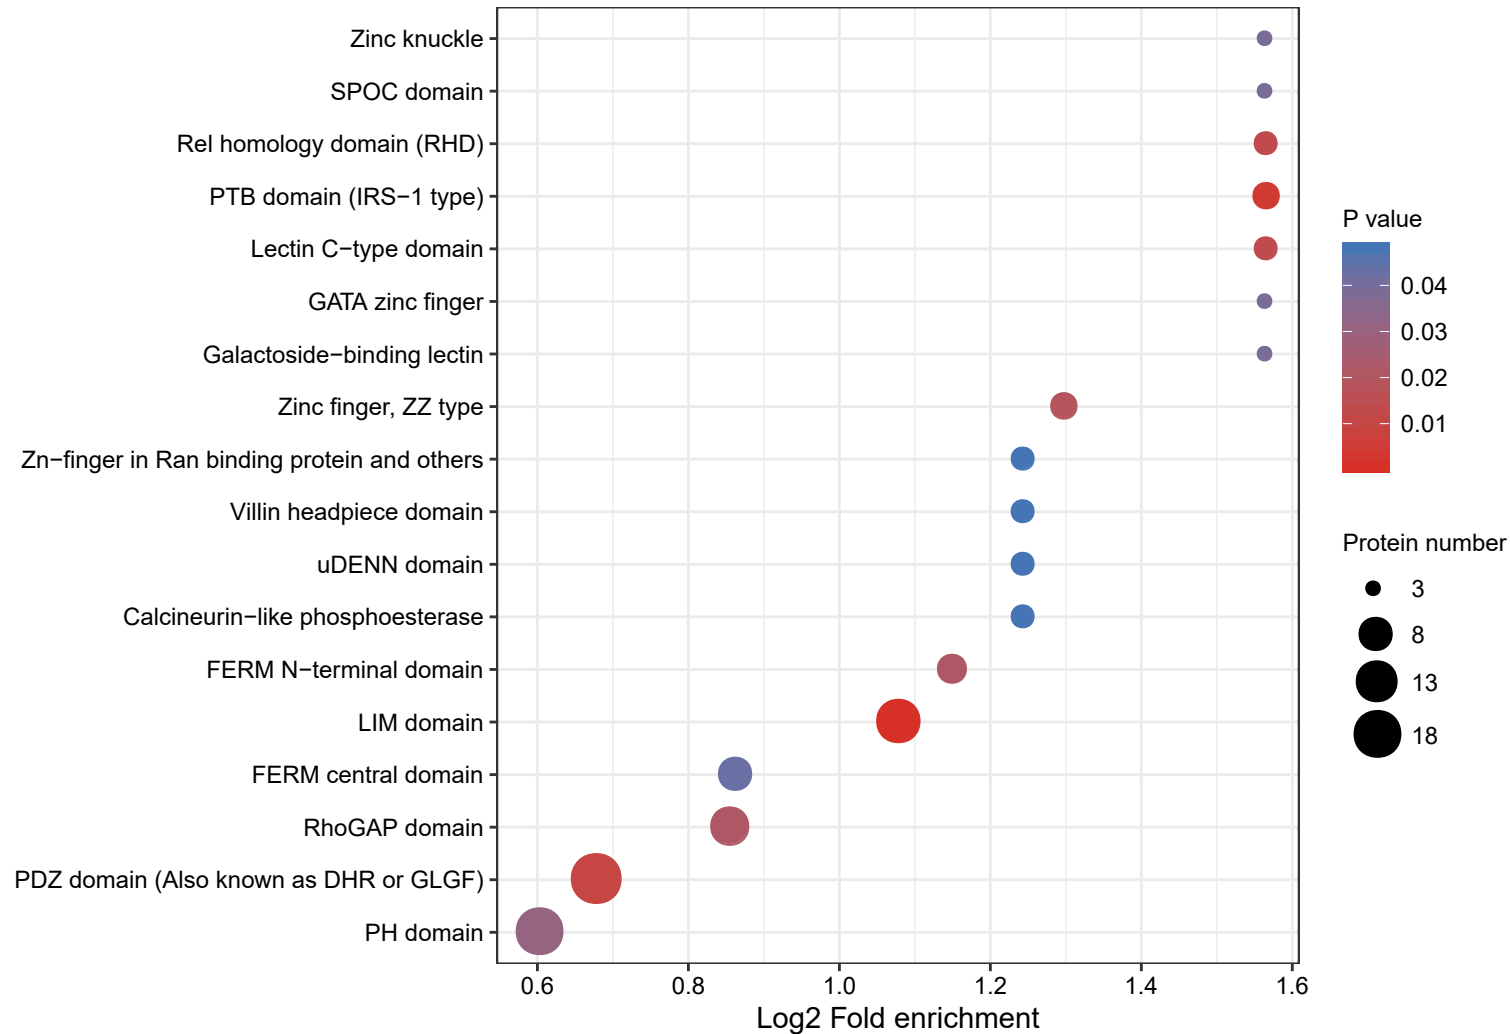

# FPD vs PD up-Domain

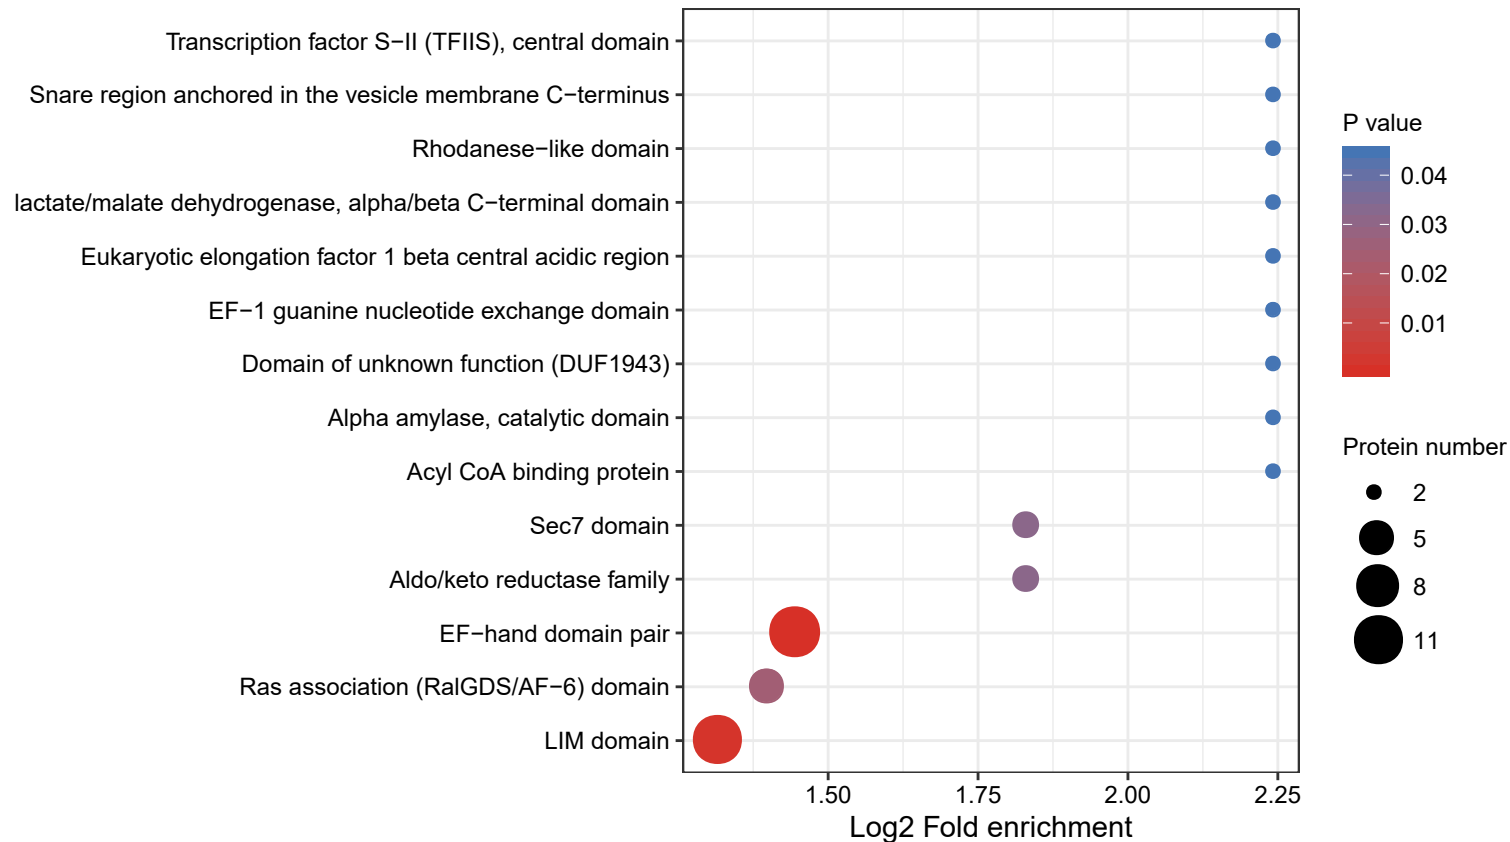

# FPD vs PD down-Domain

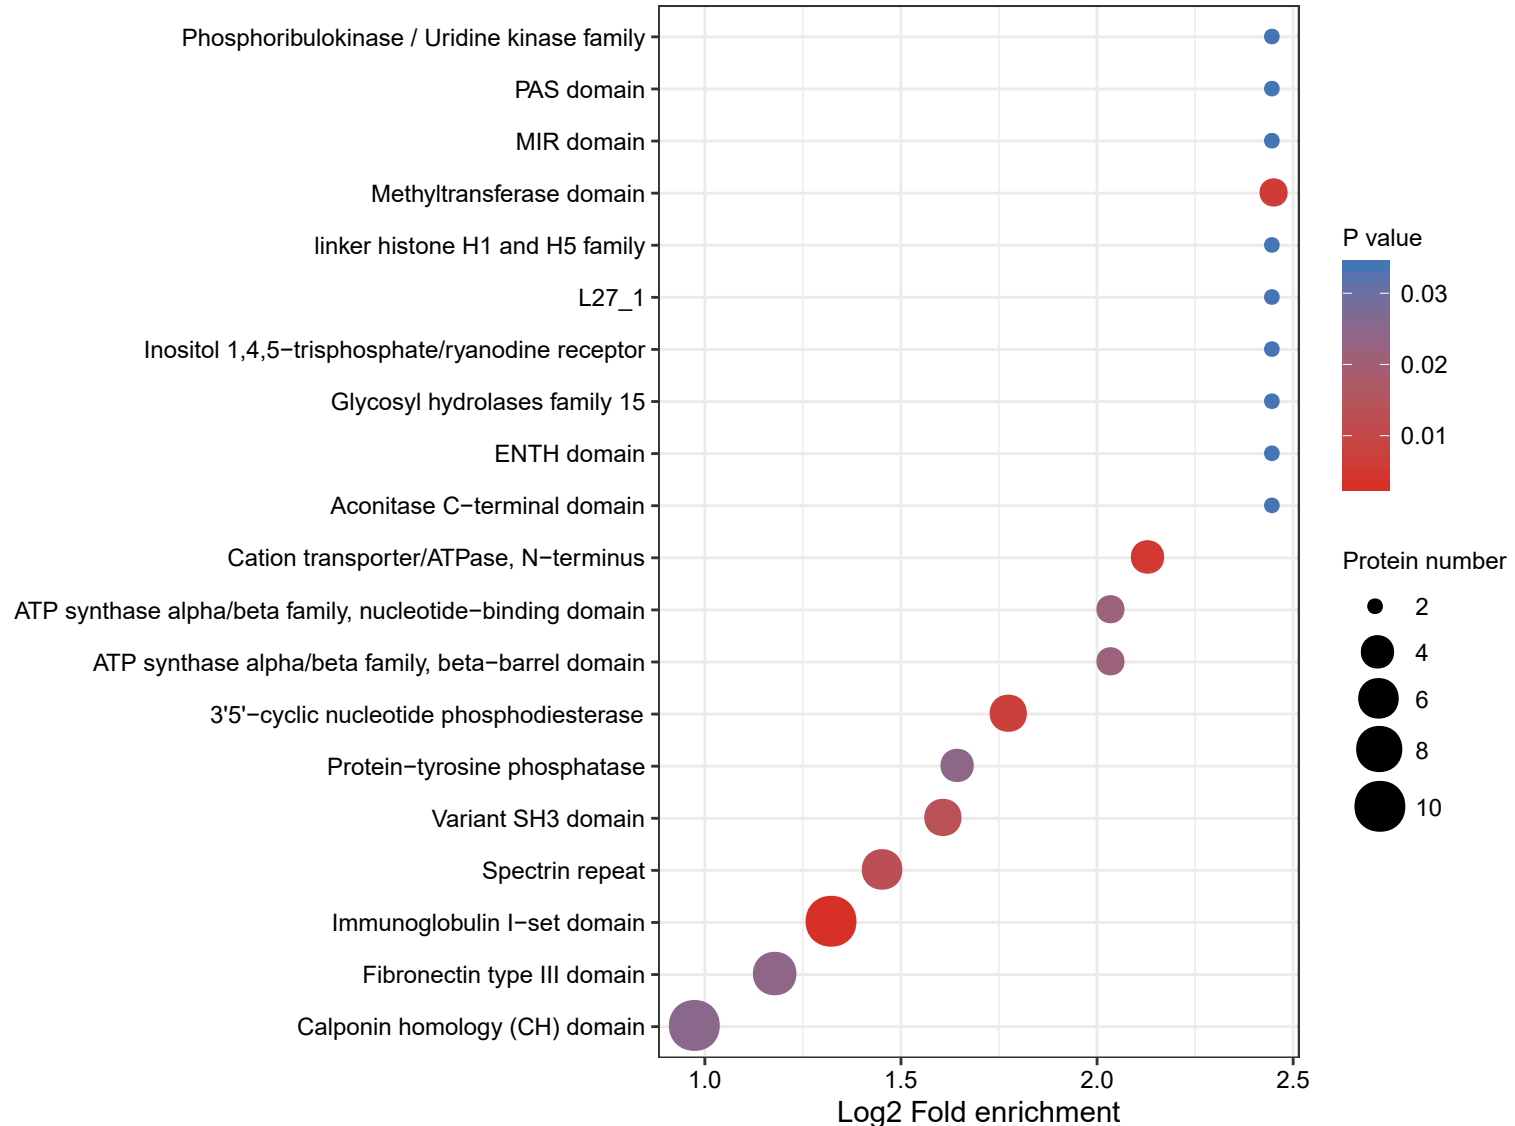

# FPD vs D up-Domain

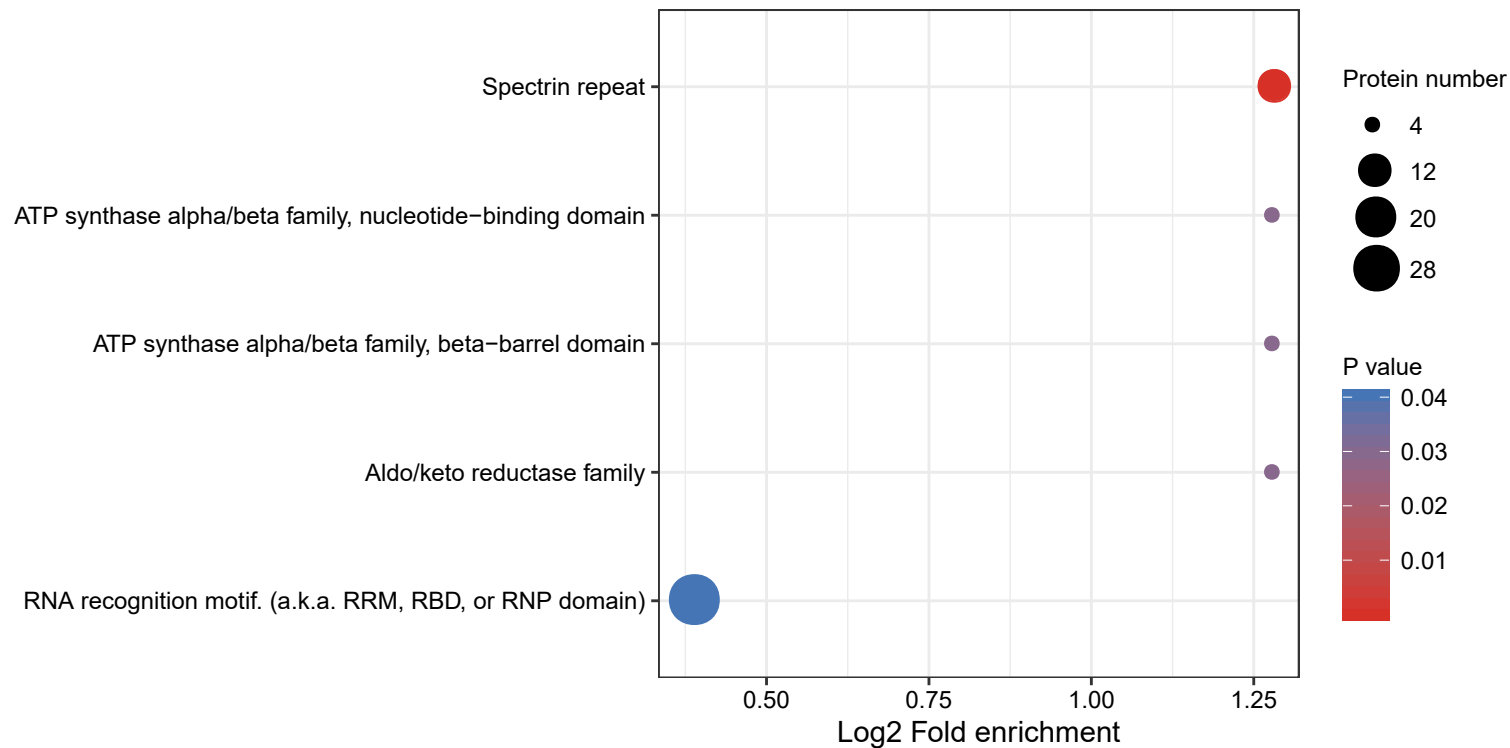

# FPD vs D down-Domain

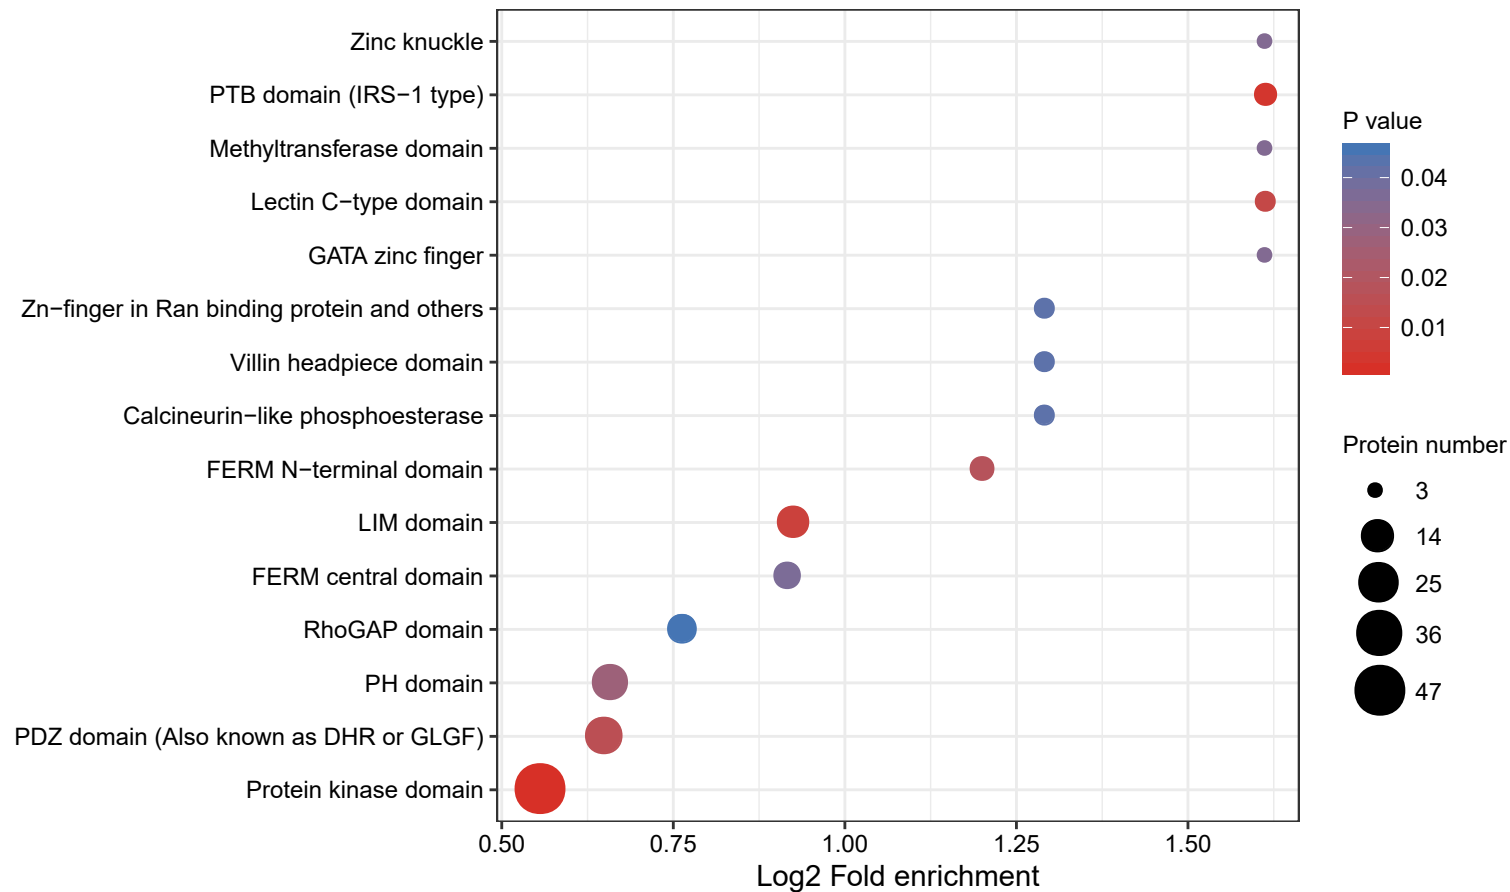

Supplement: s1 [file s1]
