# Supplementary material for: Integrative Proteomic and Phosphoproteomic Analyses Revealed Complex Mechanisms Underlying Reproductive Diapause in Bombus terrestris Queens
Source: MDPI journal article supplement (doi:10.3390/insects13100862), 2022-09-23

**Supplementary Figure S7: Overview of phosphoproteomic analyses.** (A) The distributions of raw MS/MS length and charge of peptides quantified from proteomic data. (B) Reproducibility analysis of the samples. (C) The amounts of differentially quantified phosphosites and phosphoproteins in different comparable groups.

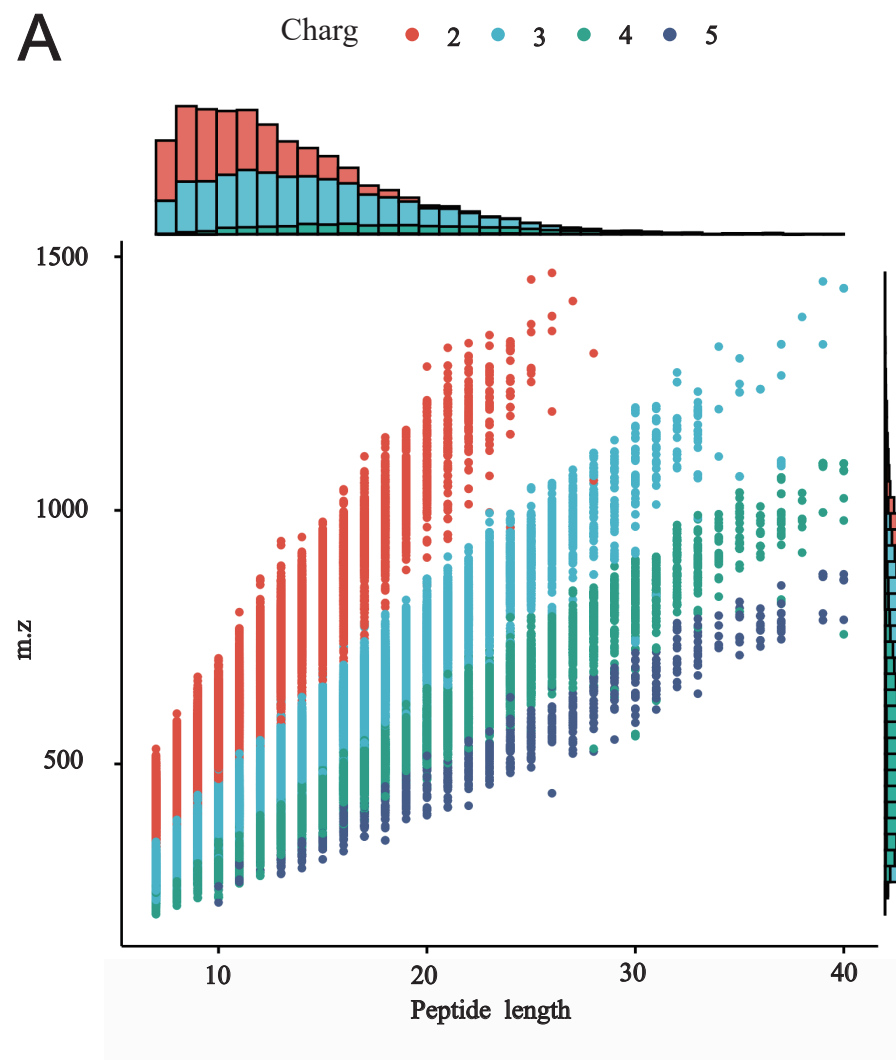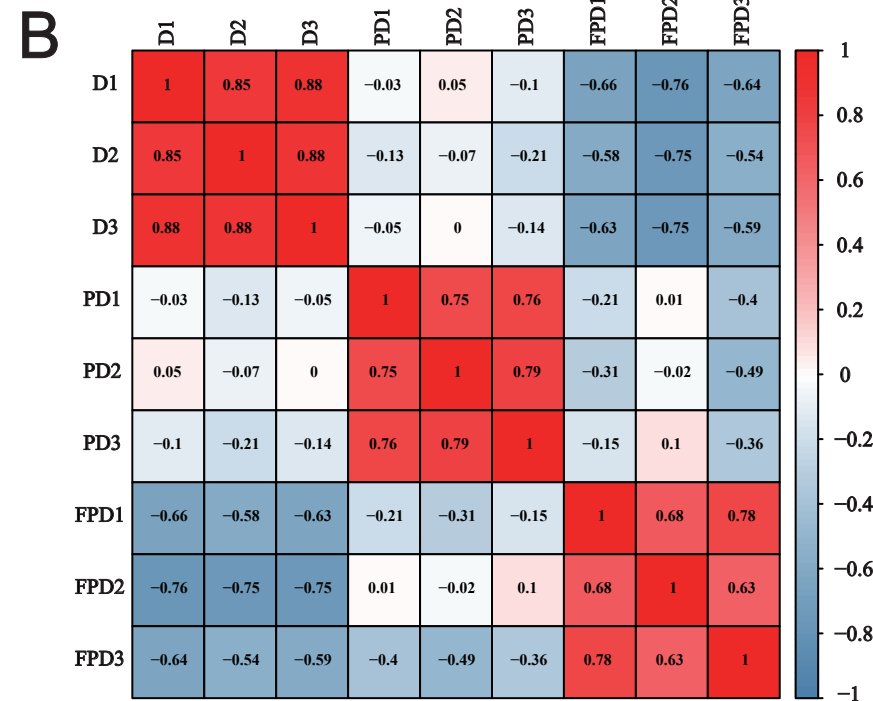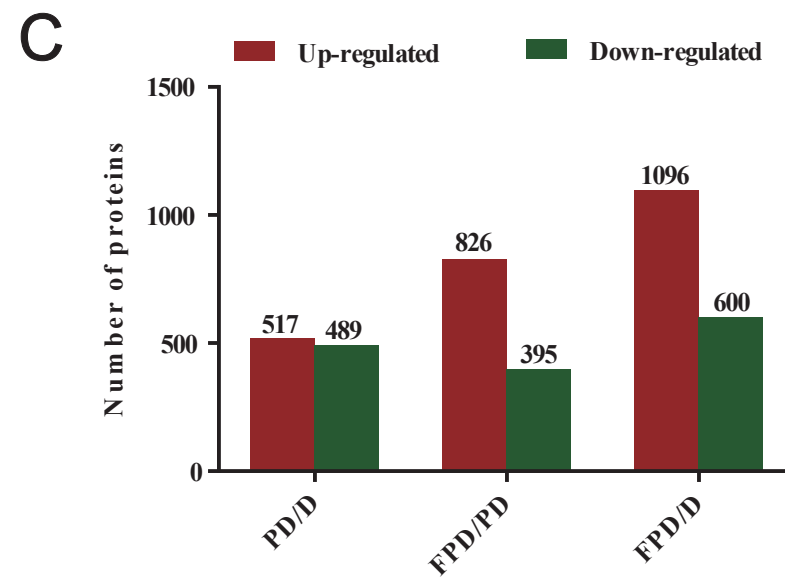

Supplement: s1 [file s1]
