# Supplementary material for: Integrative Proteomic and Phosphoproteomic Analyses Revealed Complex Mechanisms Underlying Reproductive Diapause in Bombus terrestris Queens
Source: MDPI journal article supplement (doi:10.3390/insects13100862), 2022-09-23

**Supplementary Figure S14:** Analyses of the protein-protein interaction networks for differentially expressed proteins (A, B) and differentially expressed phosphorylated proteins (C, D) between FPD/PD and FPD/D, respectively.

**A**

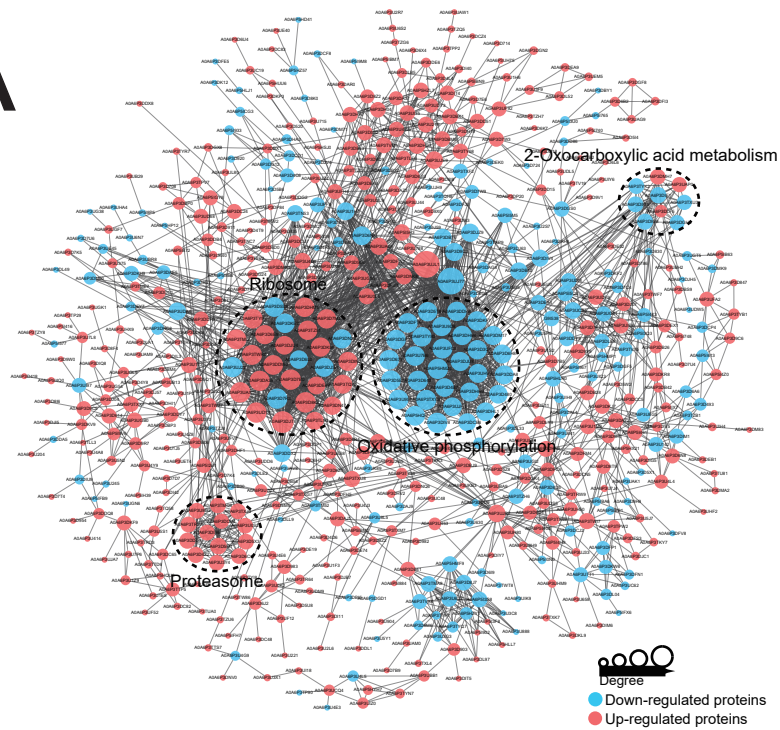

**B**

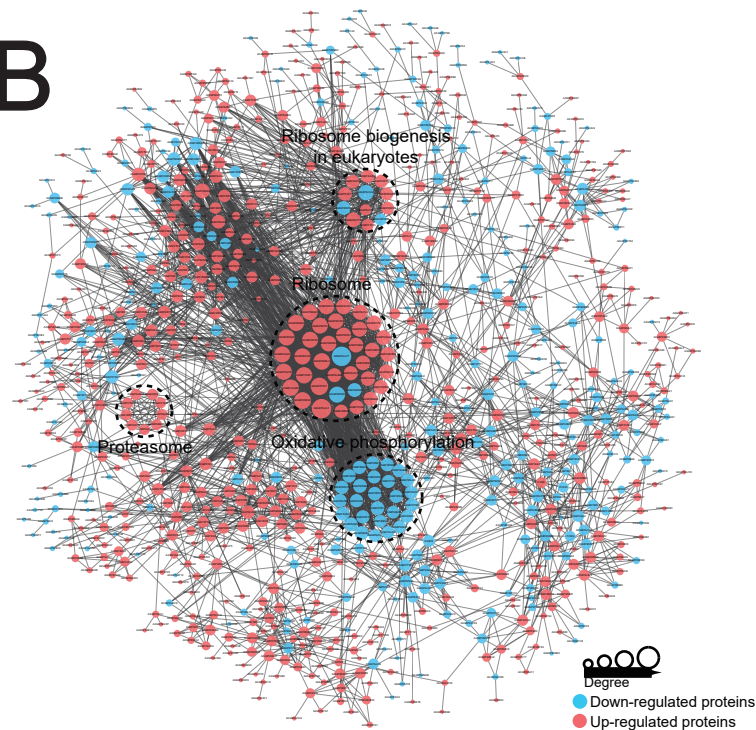

**C**

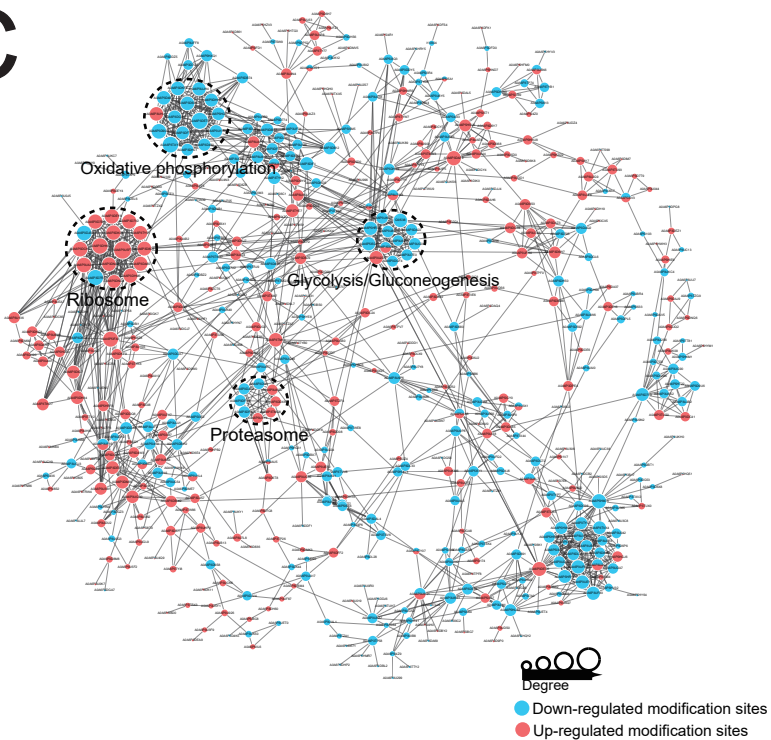

**D**

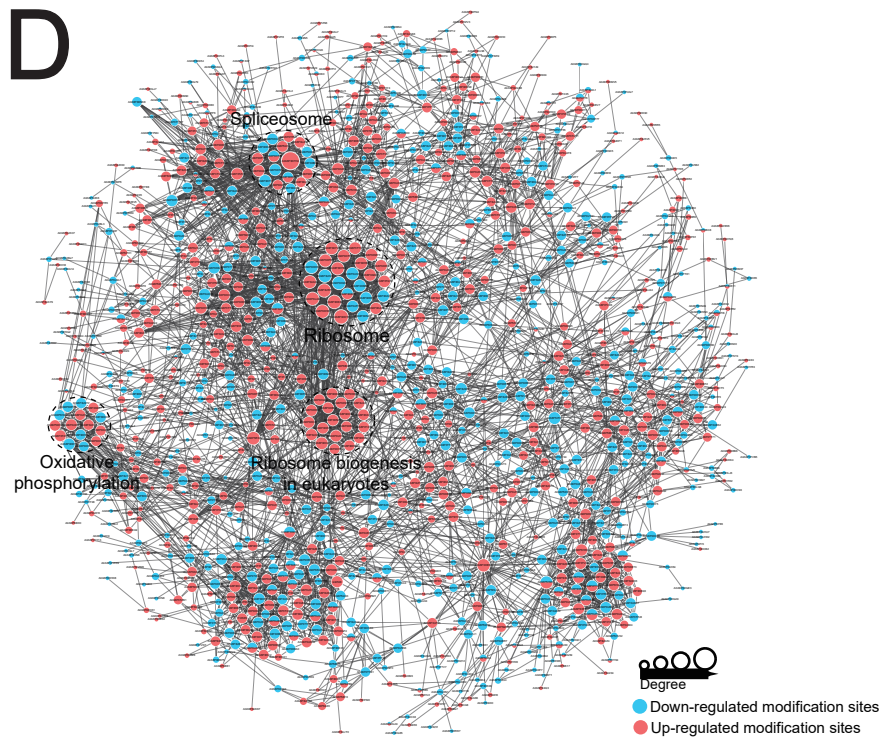

Supplement: s1 [file s1]
