# Supplementary material for: Integrative Proteomic and Phosphoproteomic Analyses Revealed Complex Mechanisms Underlying Reproductive Diapause in Bombus terrestris Queens
Source: MDPI journal article supplement (doi:10.3390/insects13100862), 2022-09-23

# Supplementary Figure S11: KEGG/GO/Domain analyses of six clusters in phosphoproteomic Mfuzz analysis. (A) KEGG enrichment analysis. (B-D) Heat maps obtained from biological process, cellular component and molecular function analyses of six clusters. (E) Protein domain analysis.

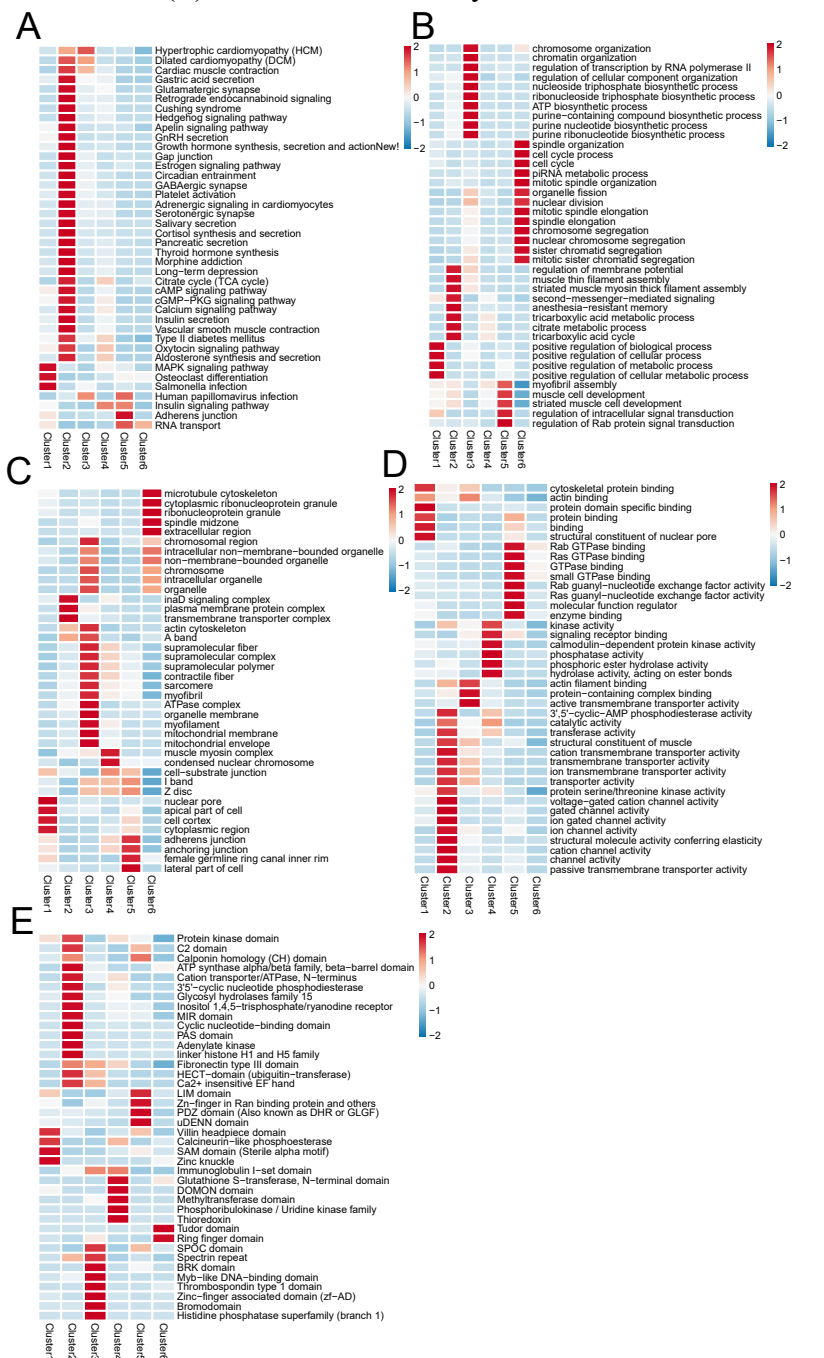

Supplement: s1 [file s1]
