# Supplementary material for: Integrative Proteomic and Phosphoproteomic Analyses Revealed Complex Mechanisms Underlying Reproductive Diapause in Bombus terrestris Queens
Source: MDPI journal article supplement (doi:10.3390/insects13100862), 2022-09-23

# Supplementary Figure S3: KEGG analysis of DEPs in each comparable group.

## PD vs D up-KEGG

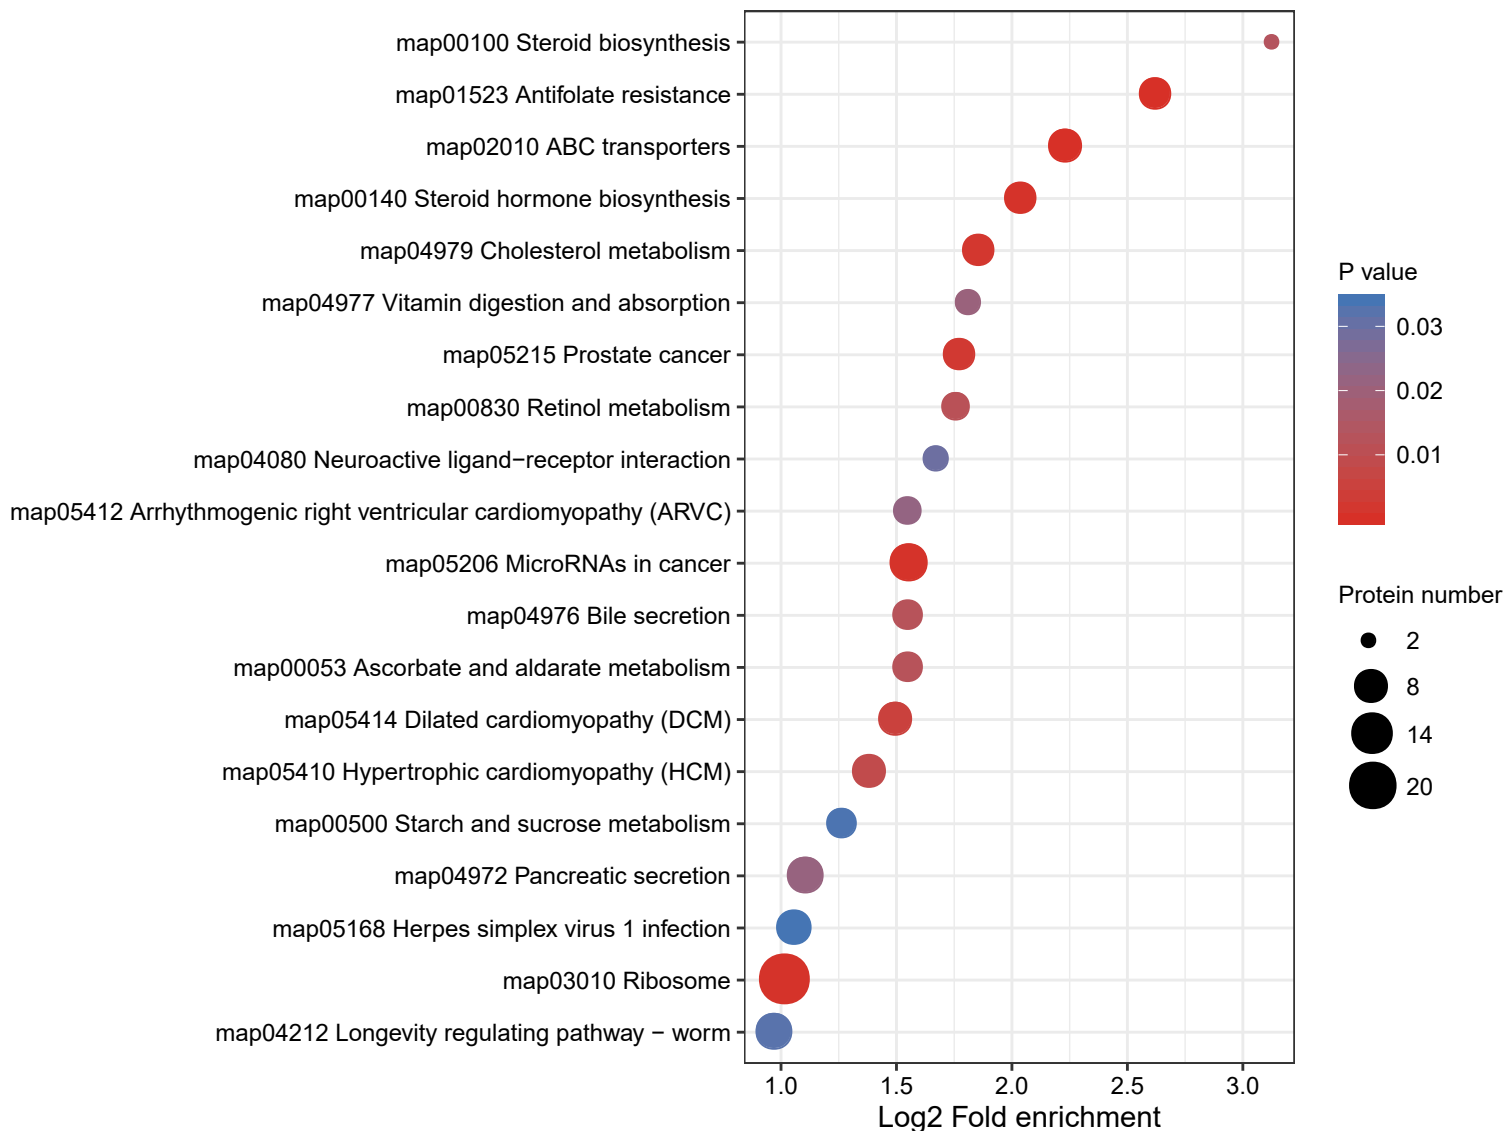

# PD vs D down-KEGG

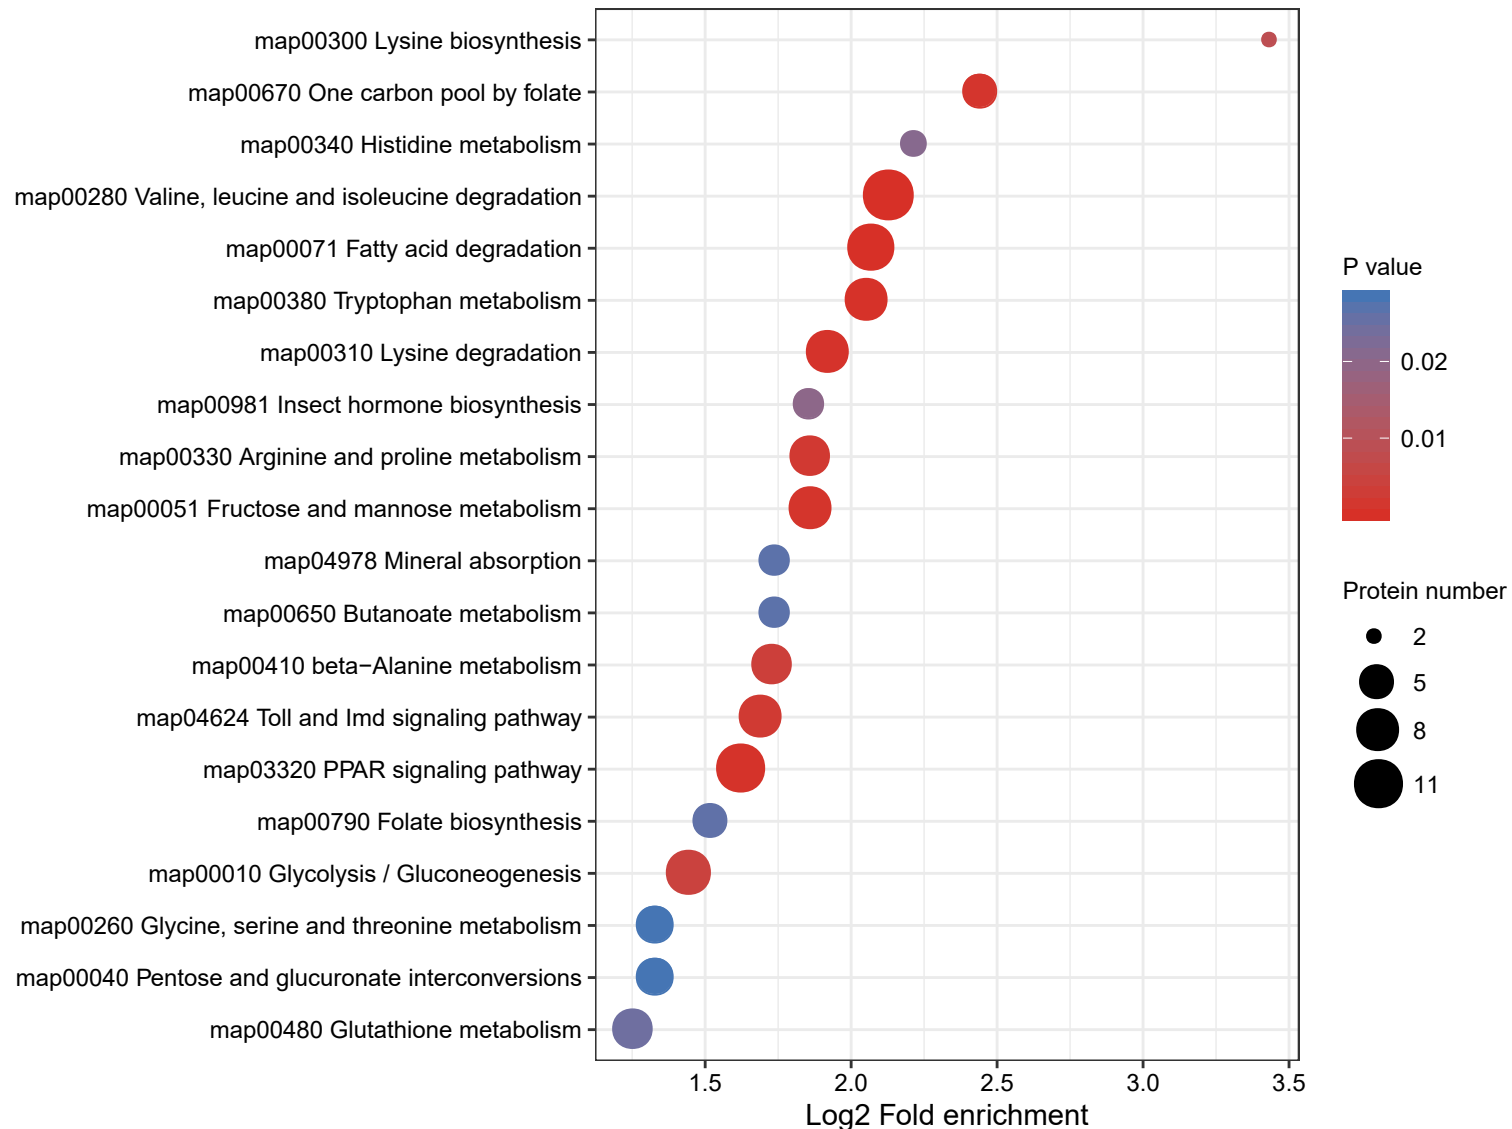

# FPD vs PD up-KEGG

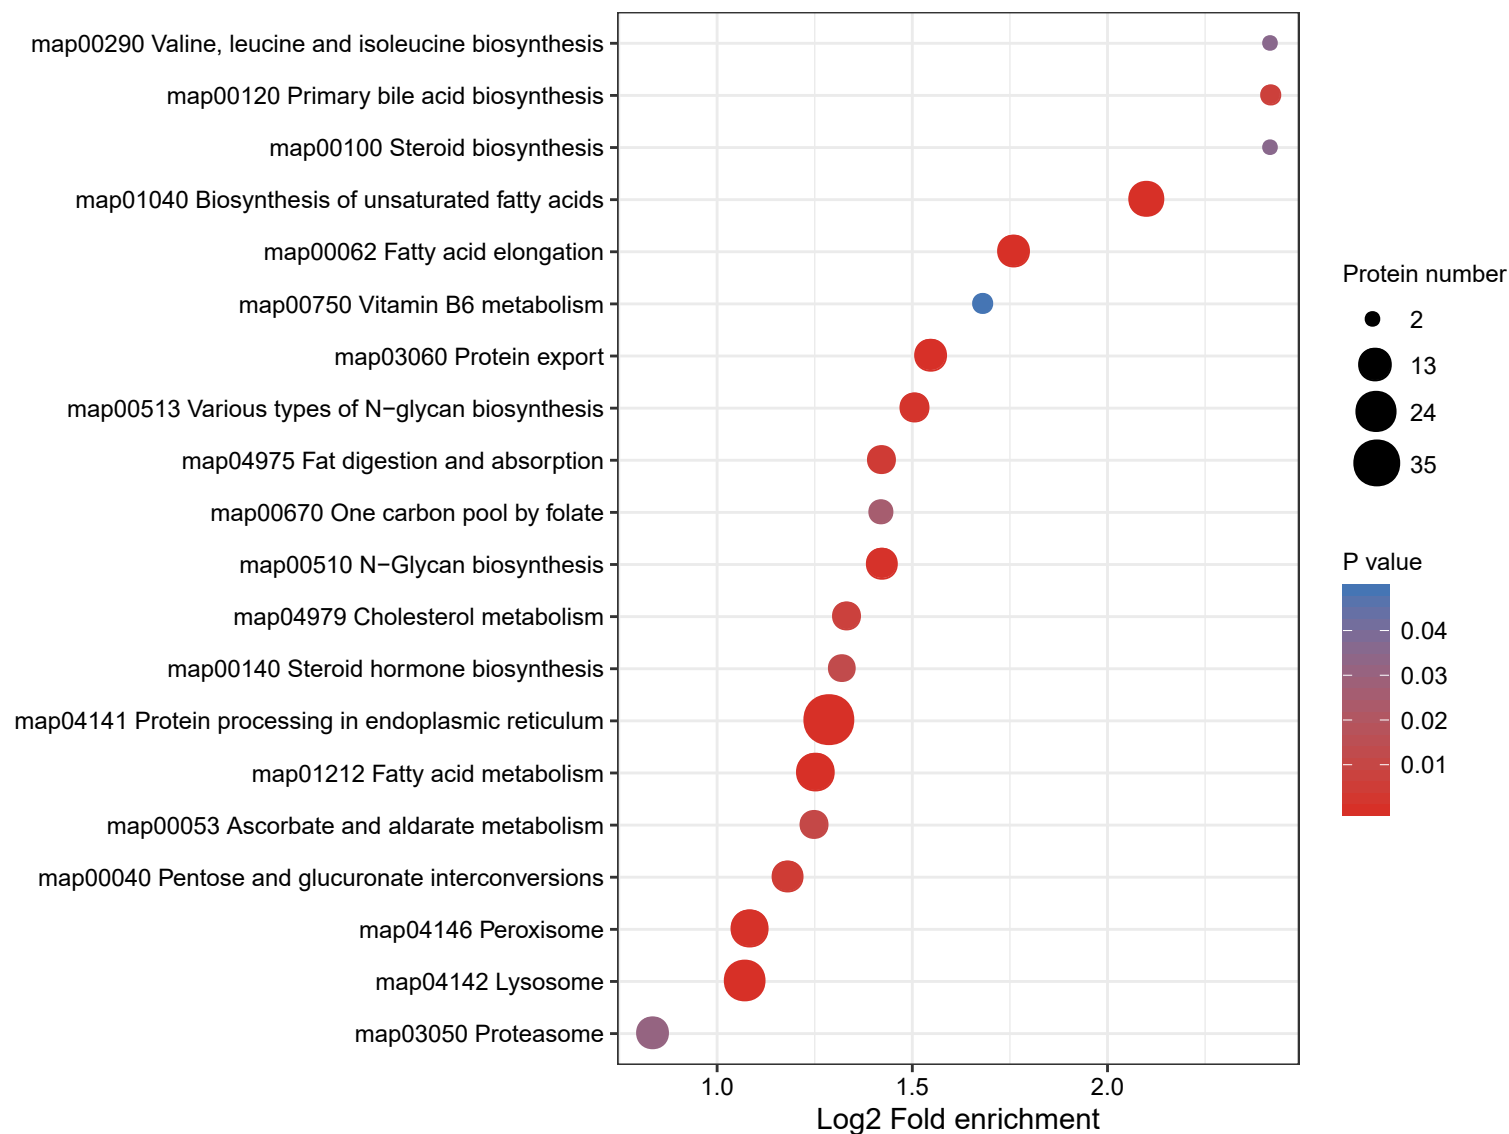

# FPD vs PD down-KEGG

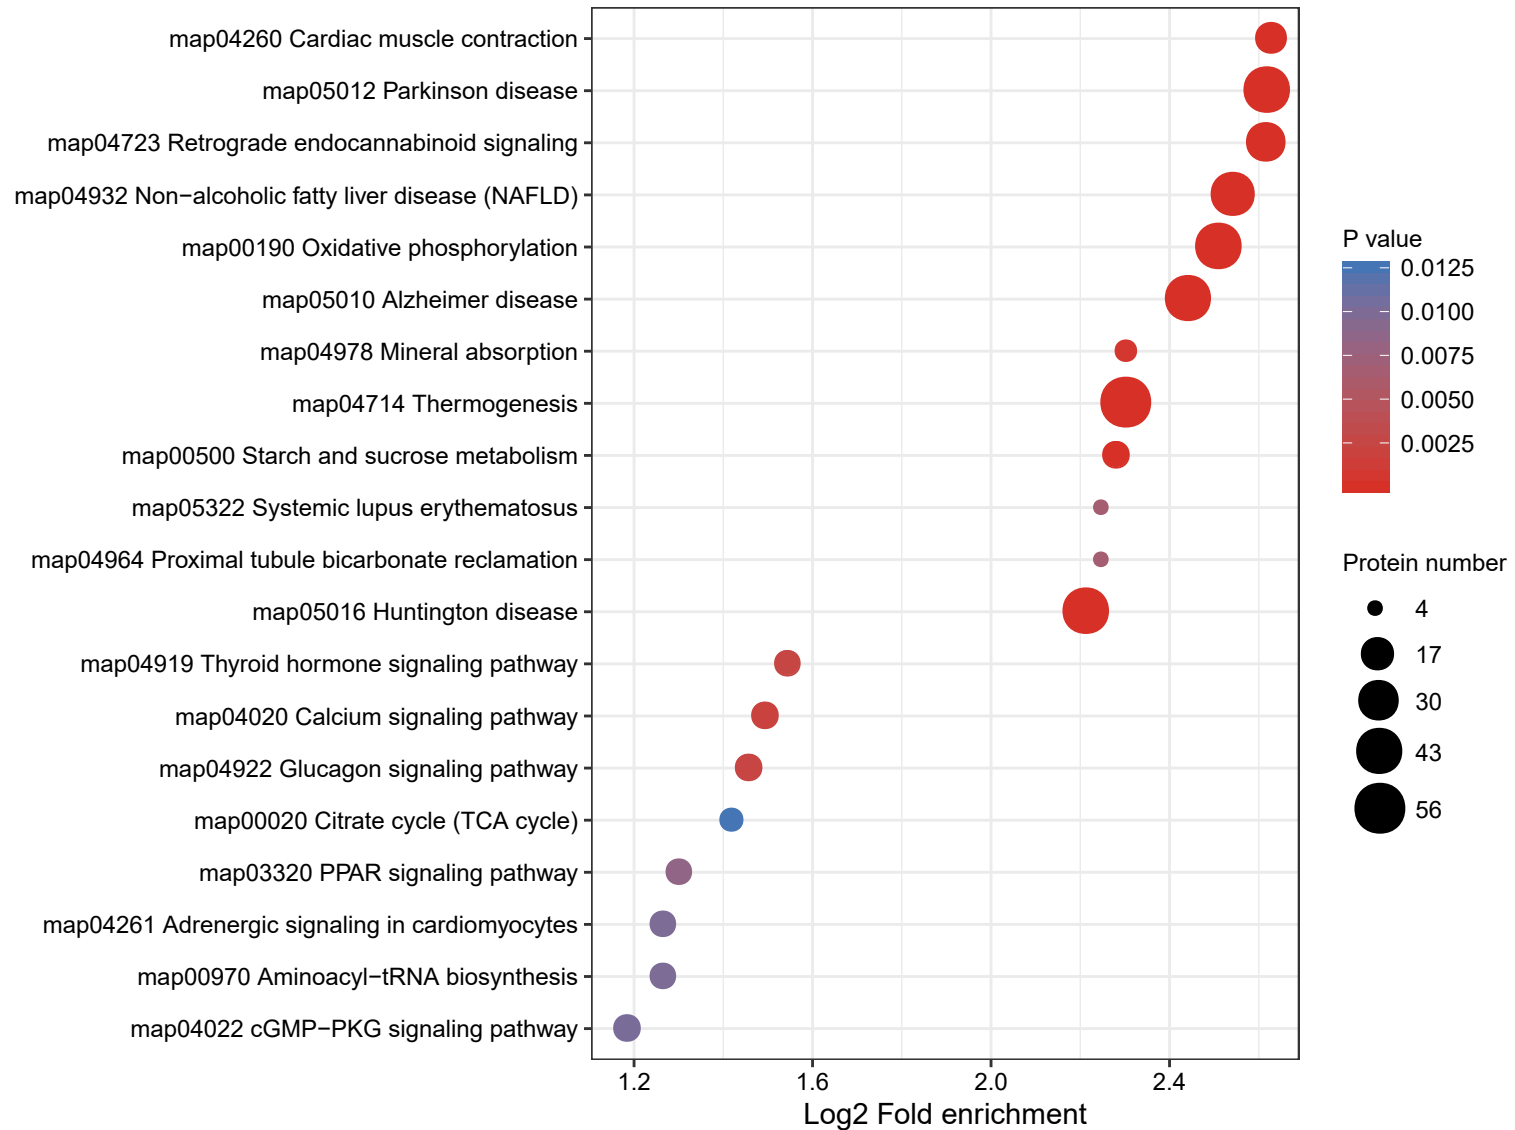

# FPD vs D up-KEGG

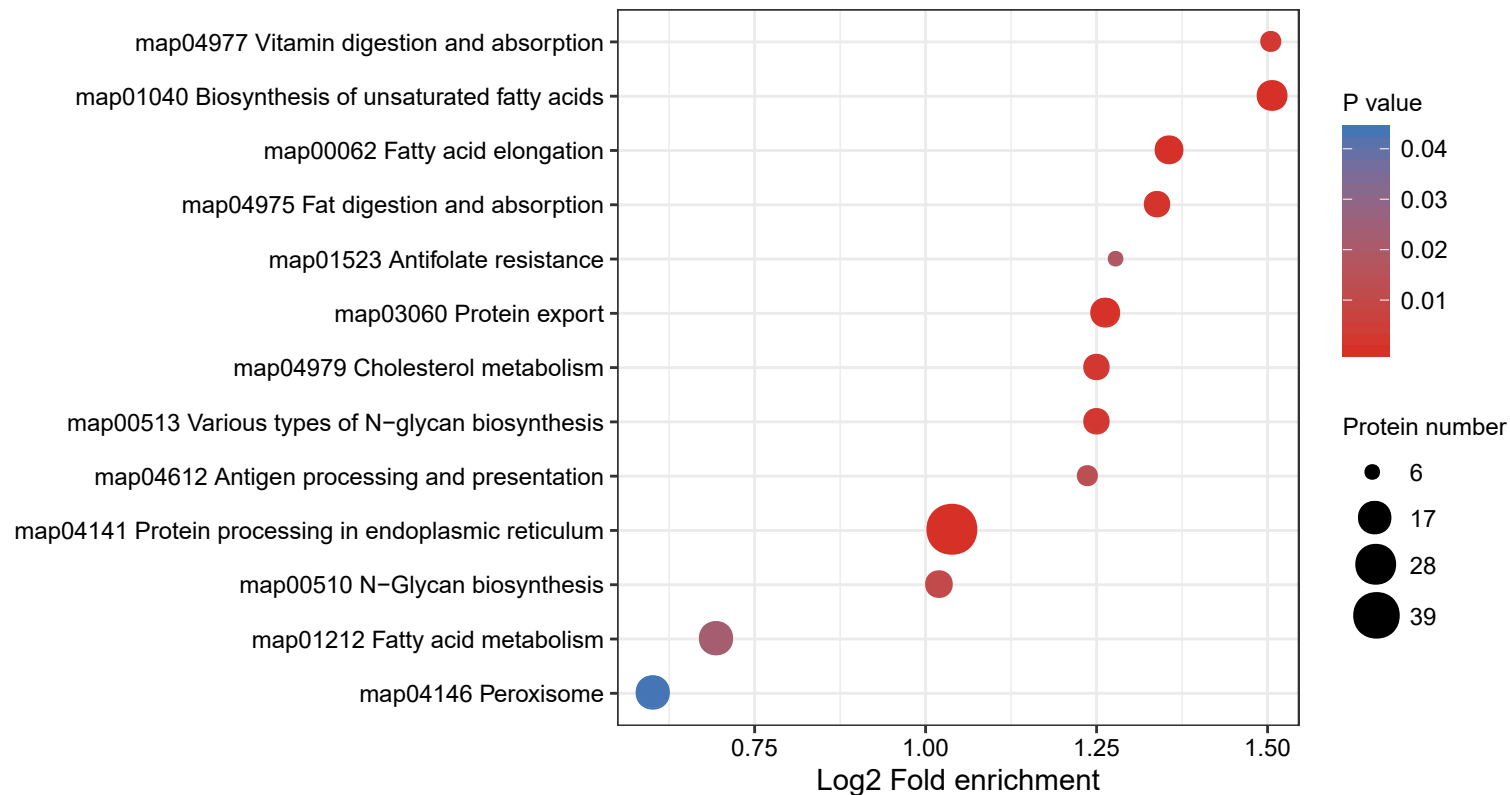

# FPD vs D down-KEGG

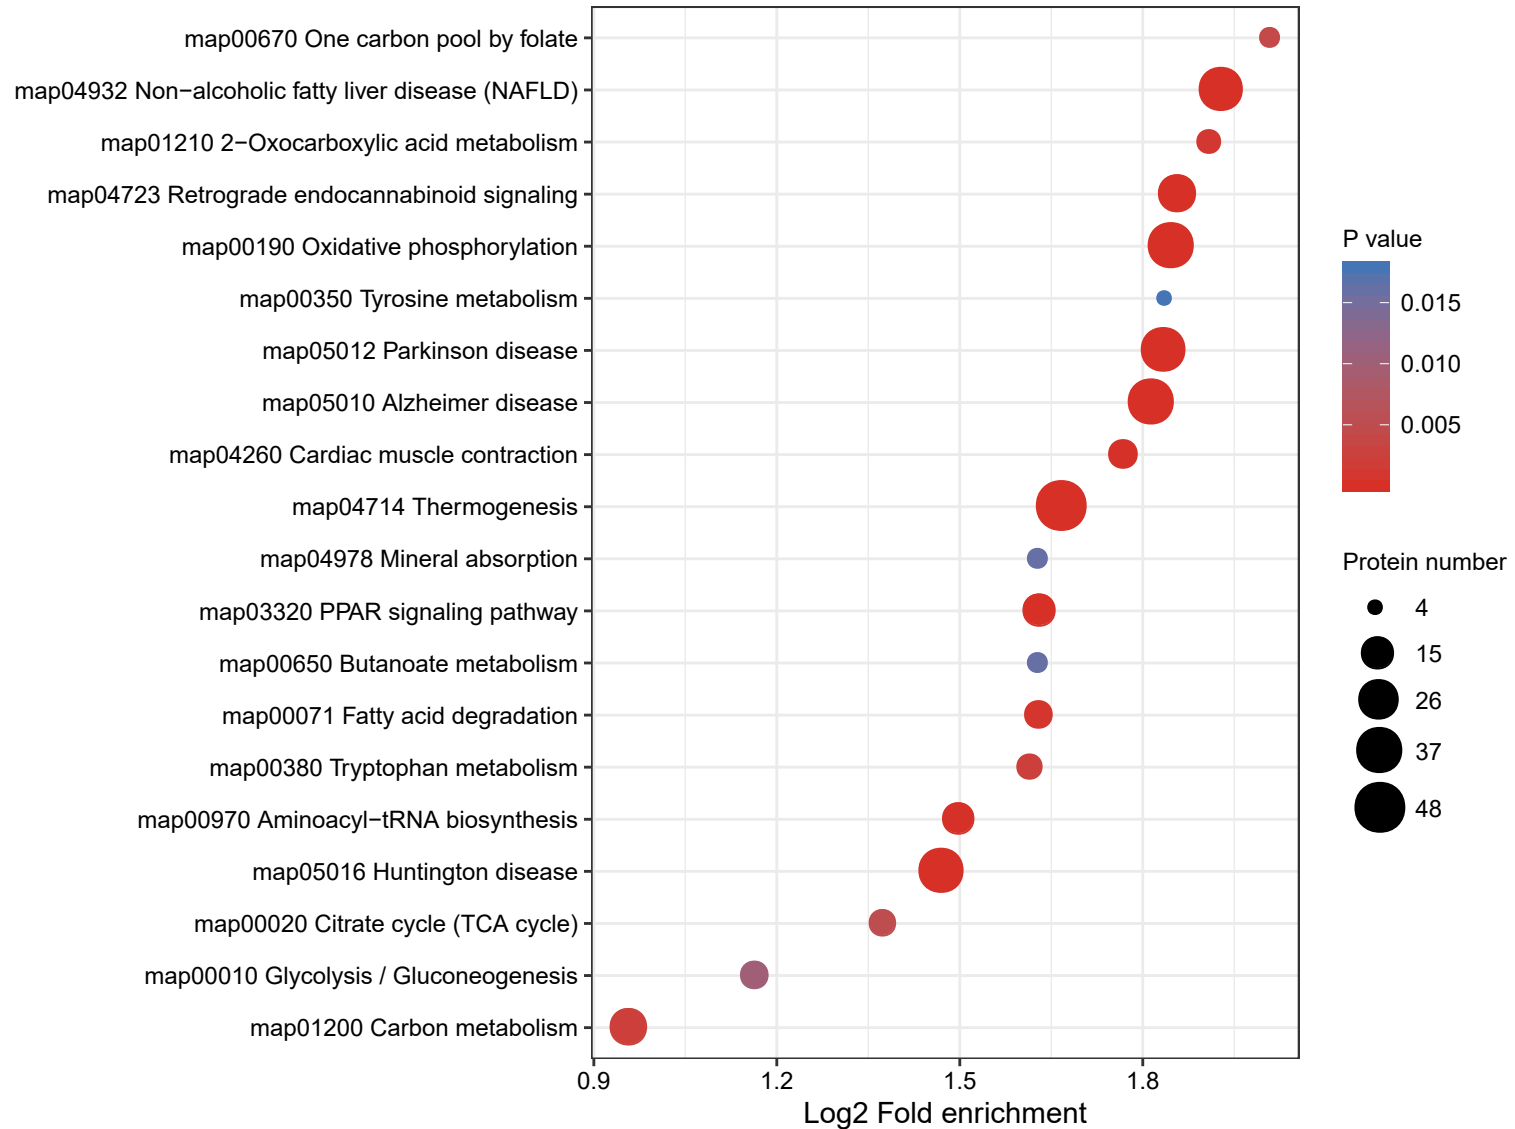

Supplement: s1 [file s1]
