# Supplementary material for: Integrative Proteomic and Phosphoproteomic Analyses Revealed Complex Mechanisms Underlying Reproductive Diapause in Bombus terrestris Queens
Source: MDPI journal article supplement (doi:10.3390/insects13100862), 2022-09-23

**Supplementary Figure S1:** Volcano plots from different group comparisons in proteome (A) and phosphoproteome (B), red dots represent fold change  $>1.3$  and  $p < 0.05$ , green dots represent fold change  $<0.77$  and  $p < 0.05$ , grey dots represent insignificantly changed proteins or phosphorylation sites.

**A**

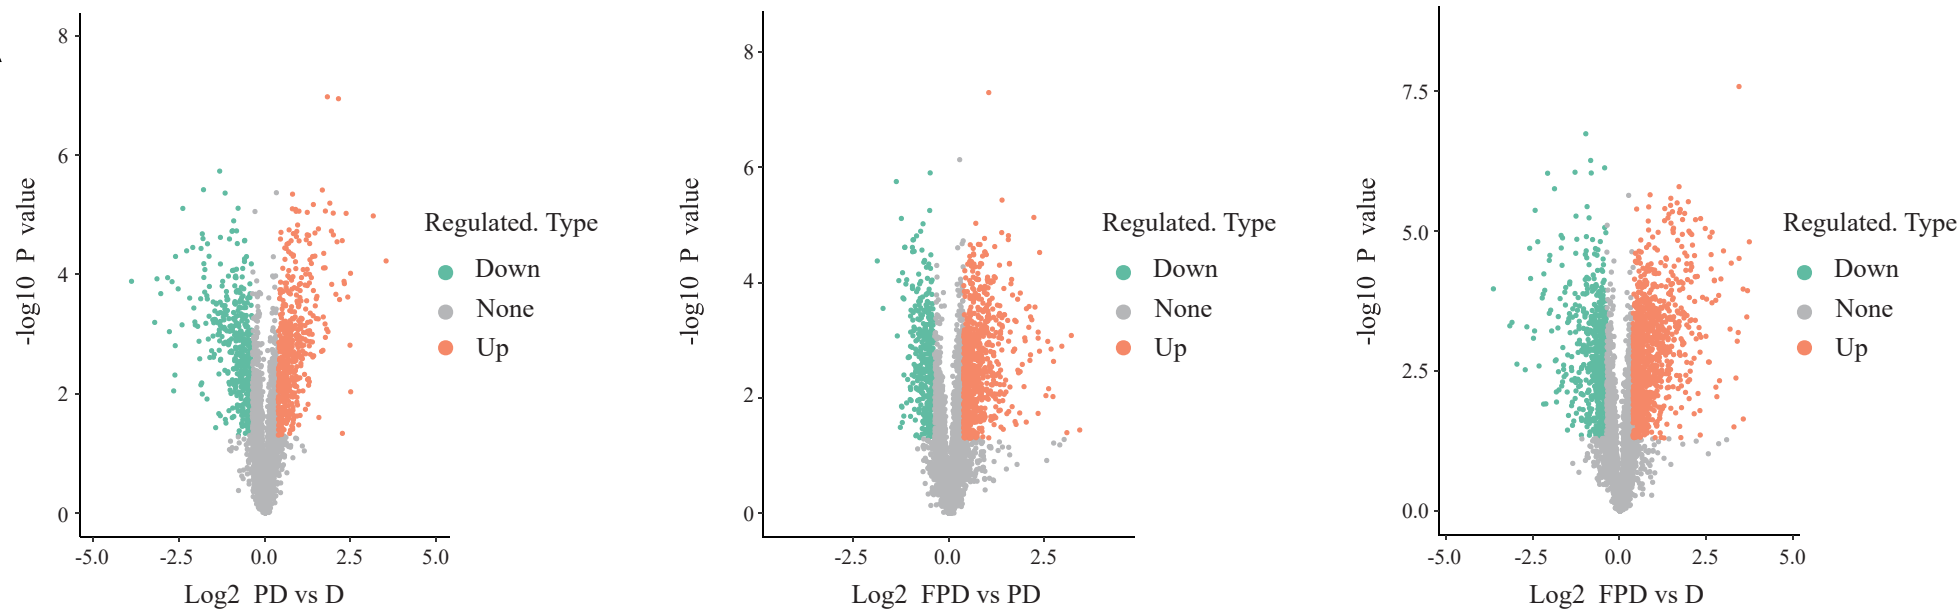

**B**

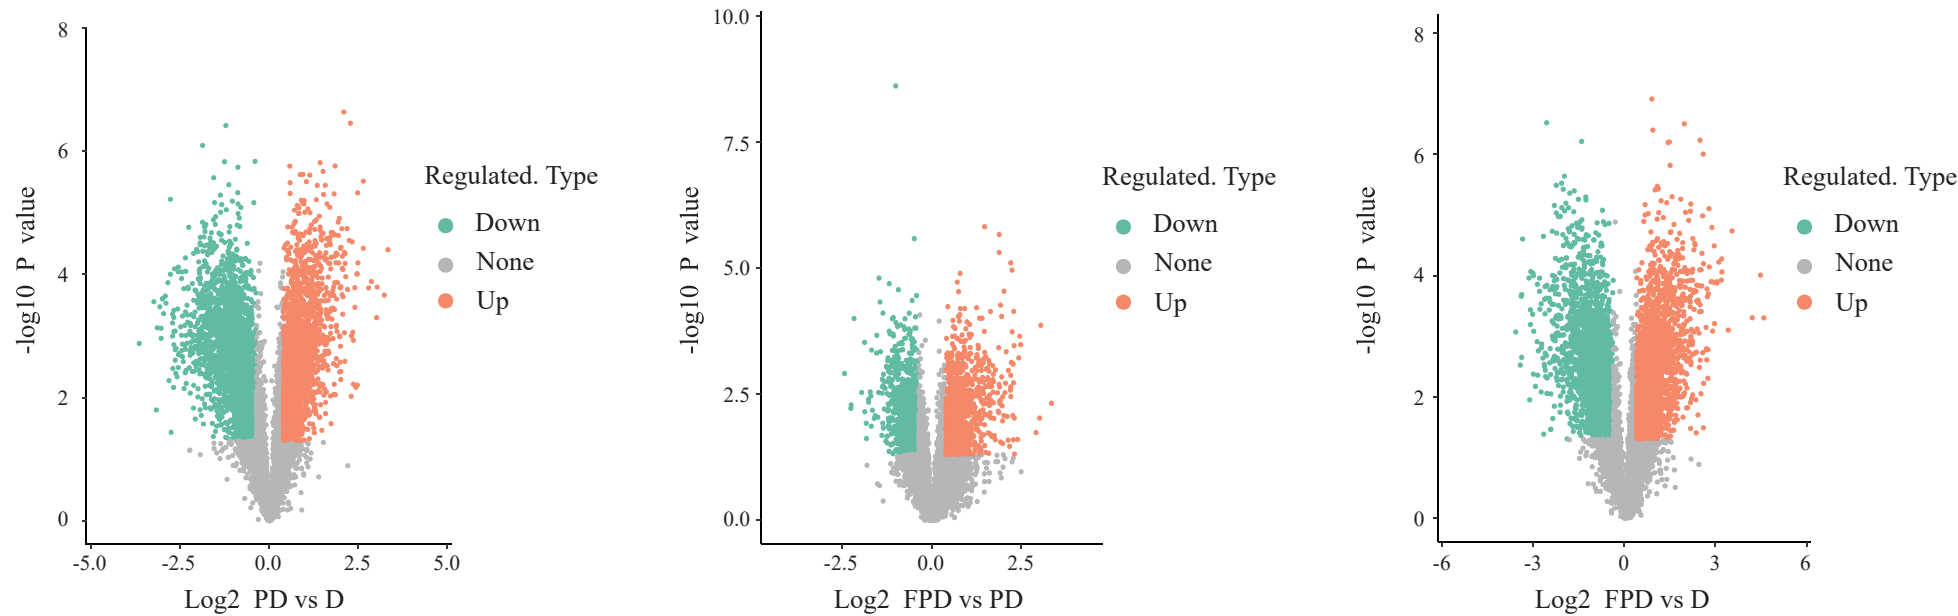

Supplement: s1 [file s1]
