# Supplementary material for: Integrative Proteomic and Phosphoproteomic Analyses Revealed Complex Mechanisms Underlying Reproductive Diapause in Bombus terrestris Queens
Source: MDPI journal article supplement (doi:10.3390/insects13100862), 2022-09-23
Supplement: s1 [file s1]

**Supplementary Figure S12: Phosphokinase activity in each group and comparable group.**

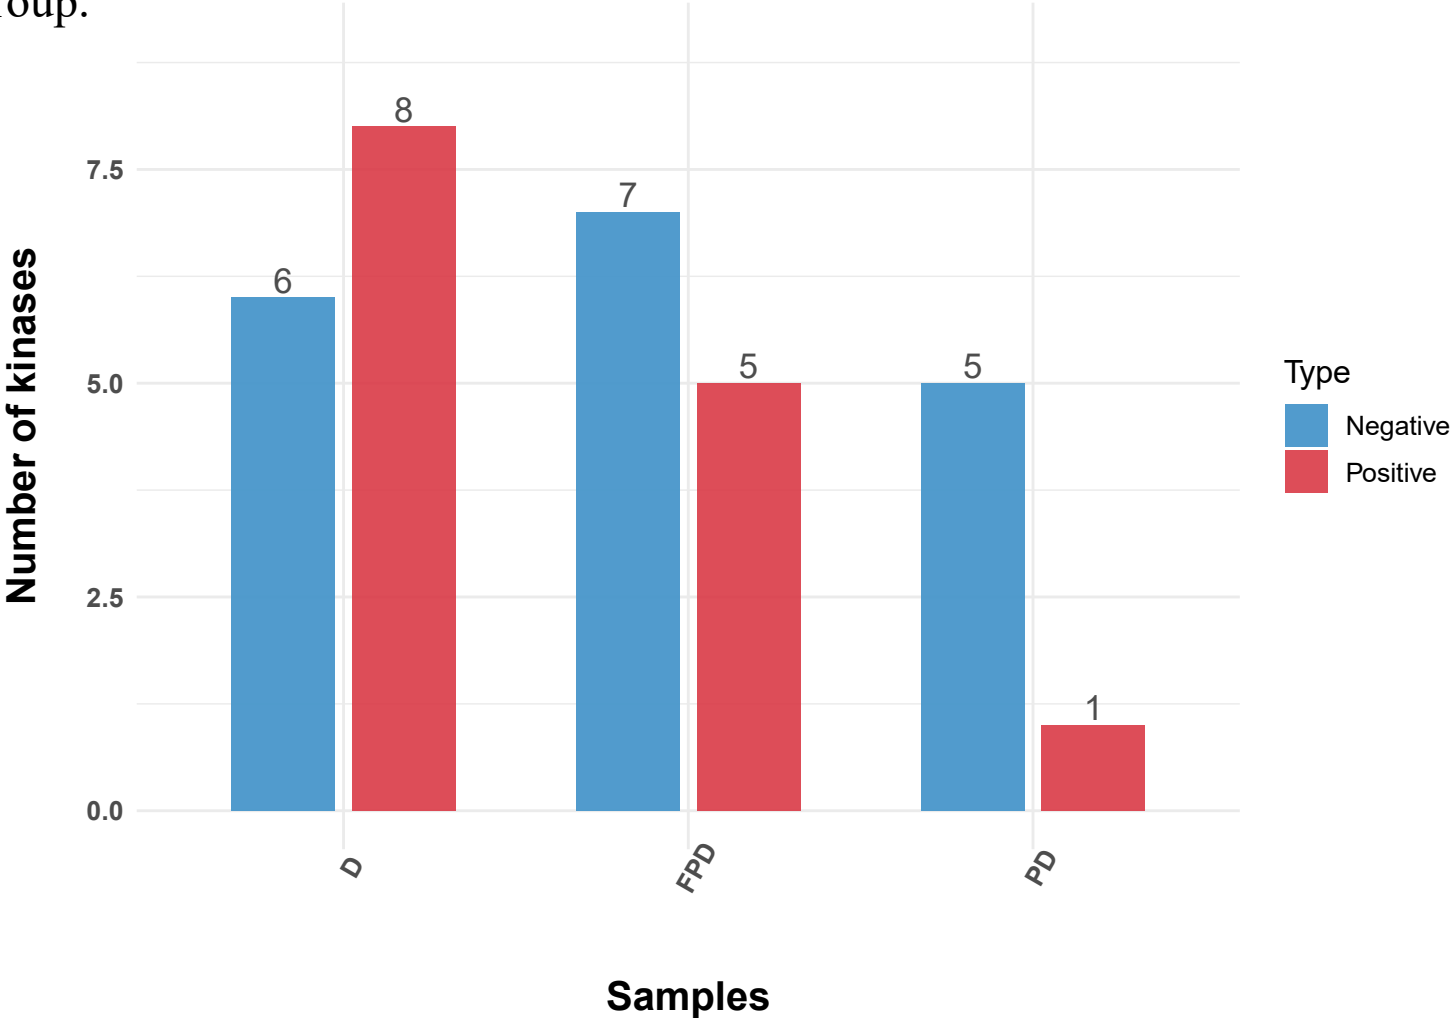

Number of kinases

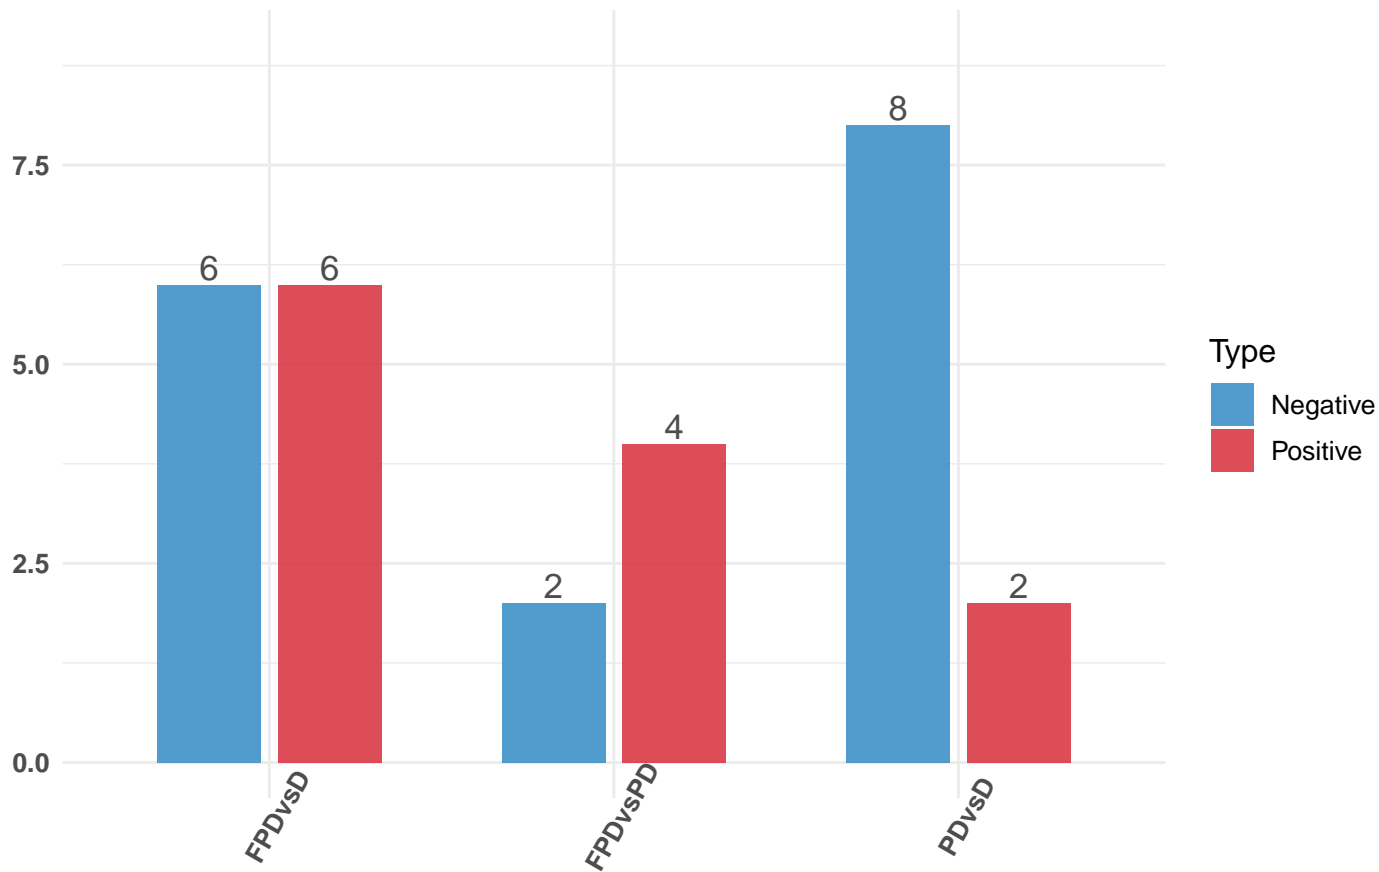

Comparable groups
