# Supplementary material for: Integrative Proteomic and Phosphoproteomic Analyses Revealed Complex Mechanisms Underlying Reproductive Diapause in Bombus terrestris Queens
Source: MDPI journal article supplement (doi:10.3390/insects13100862), 2022-09-23

**Supplementary Figure S13:** Motif enrichment heat map of phosphoserine (S) and phosphothreonine (T) upstream and downstream of the identified phosphorylation modification sites.

**PD vs D up S motif**

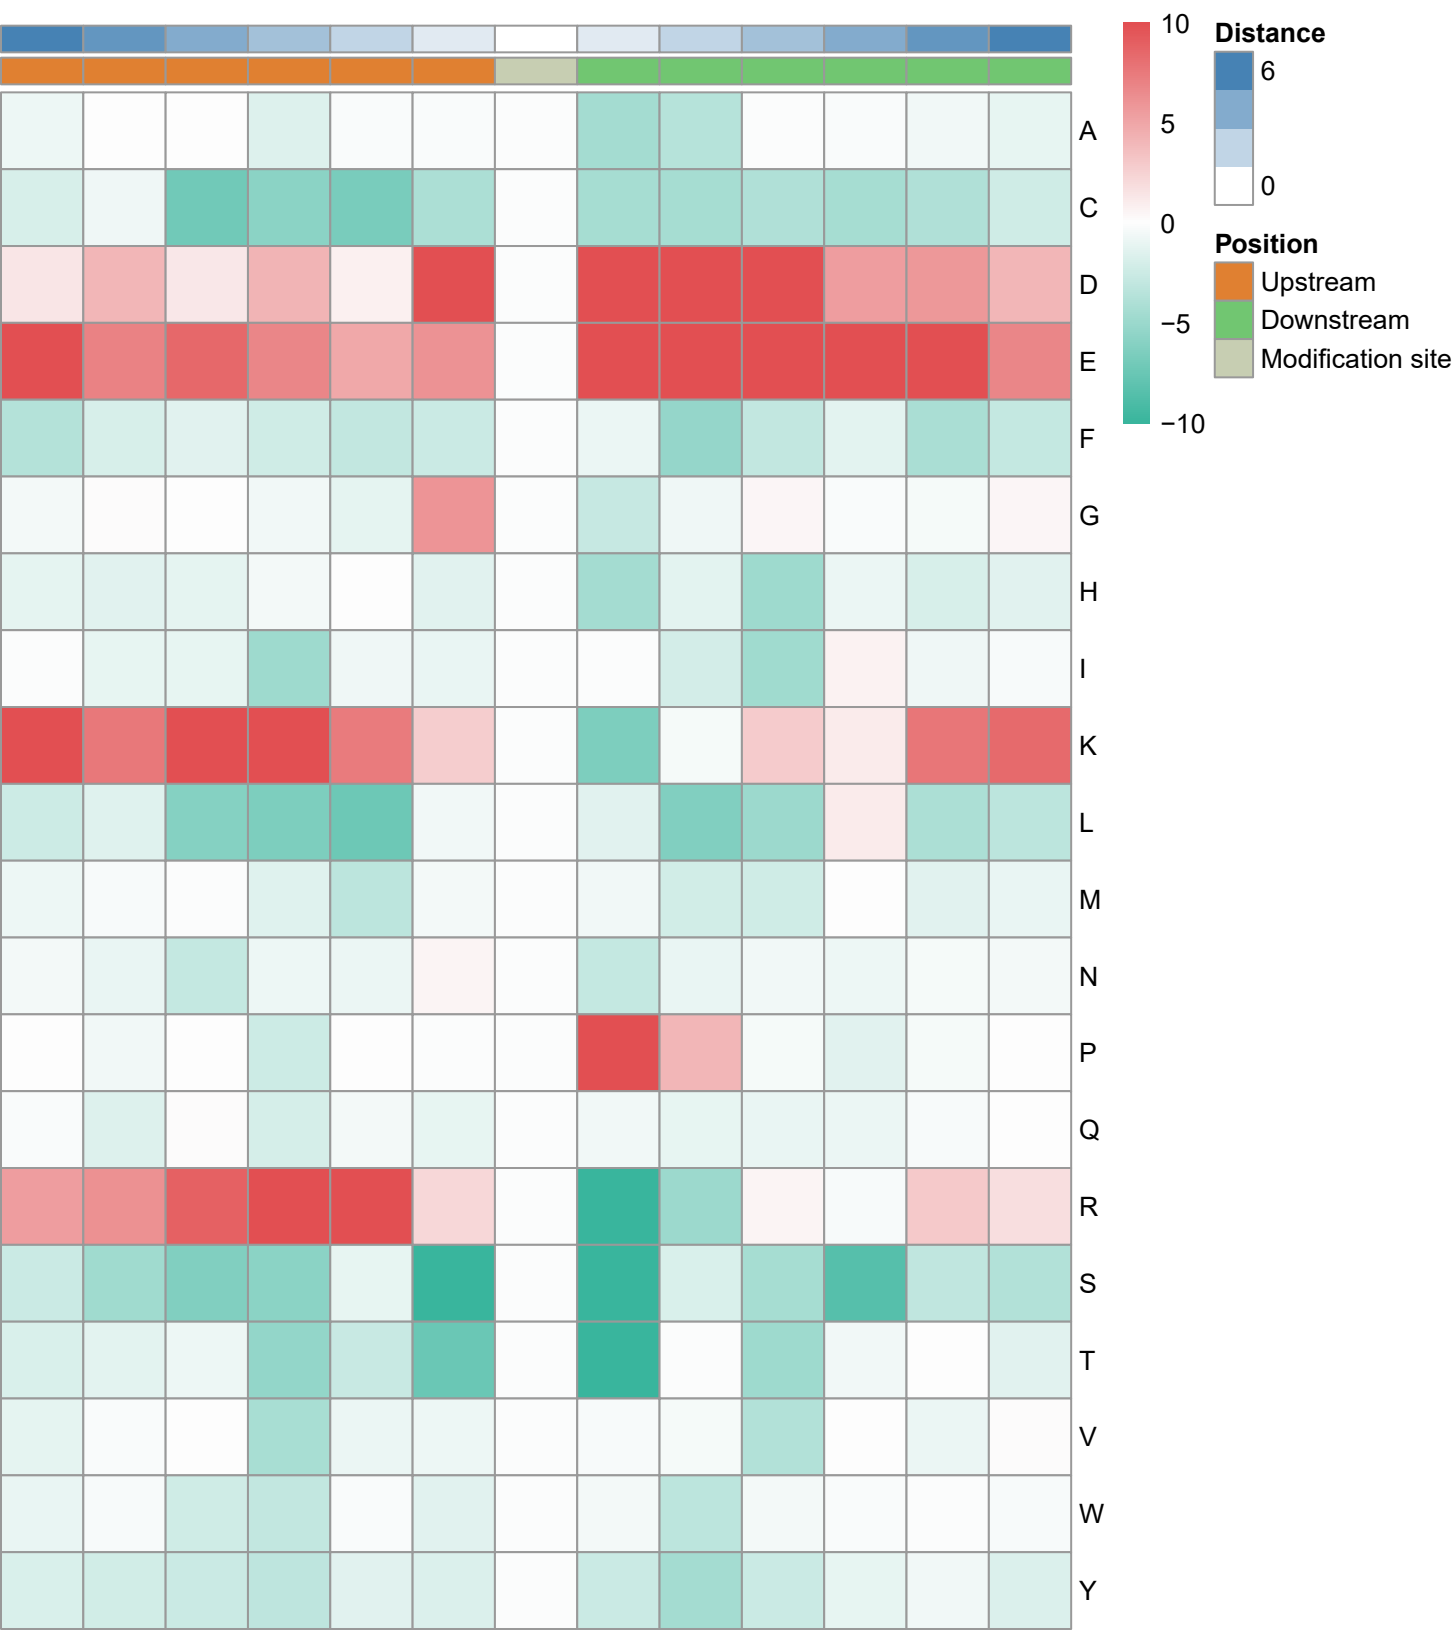

# PD vs D up T motif

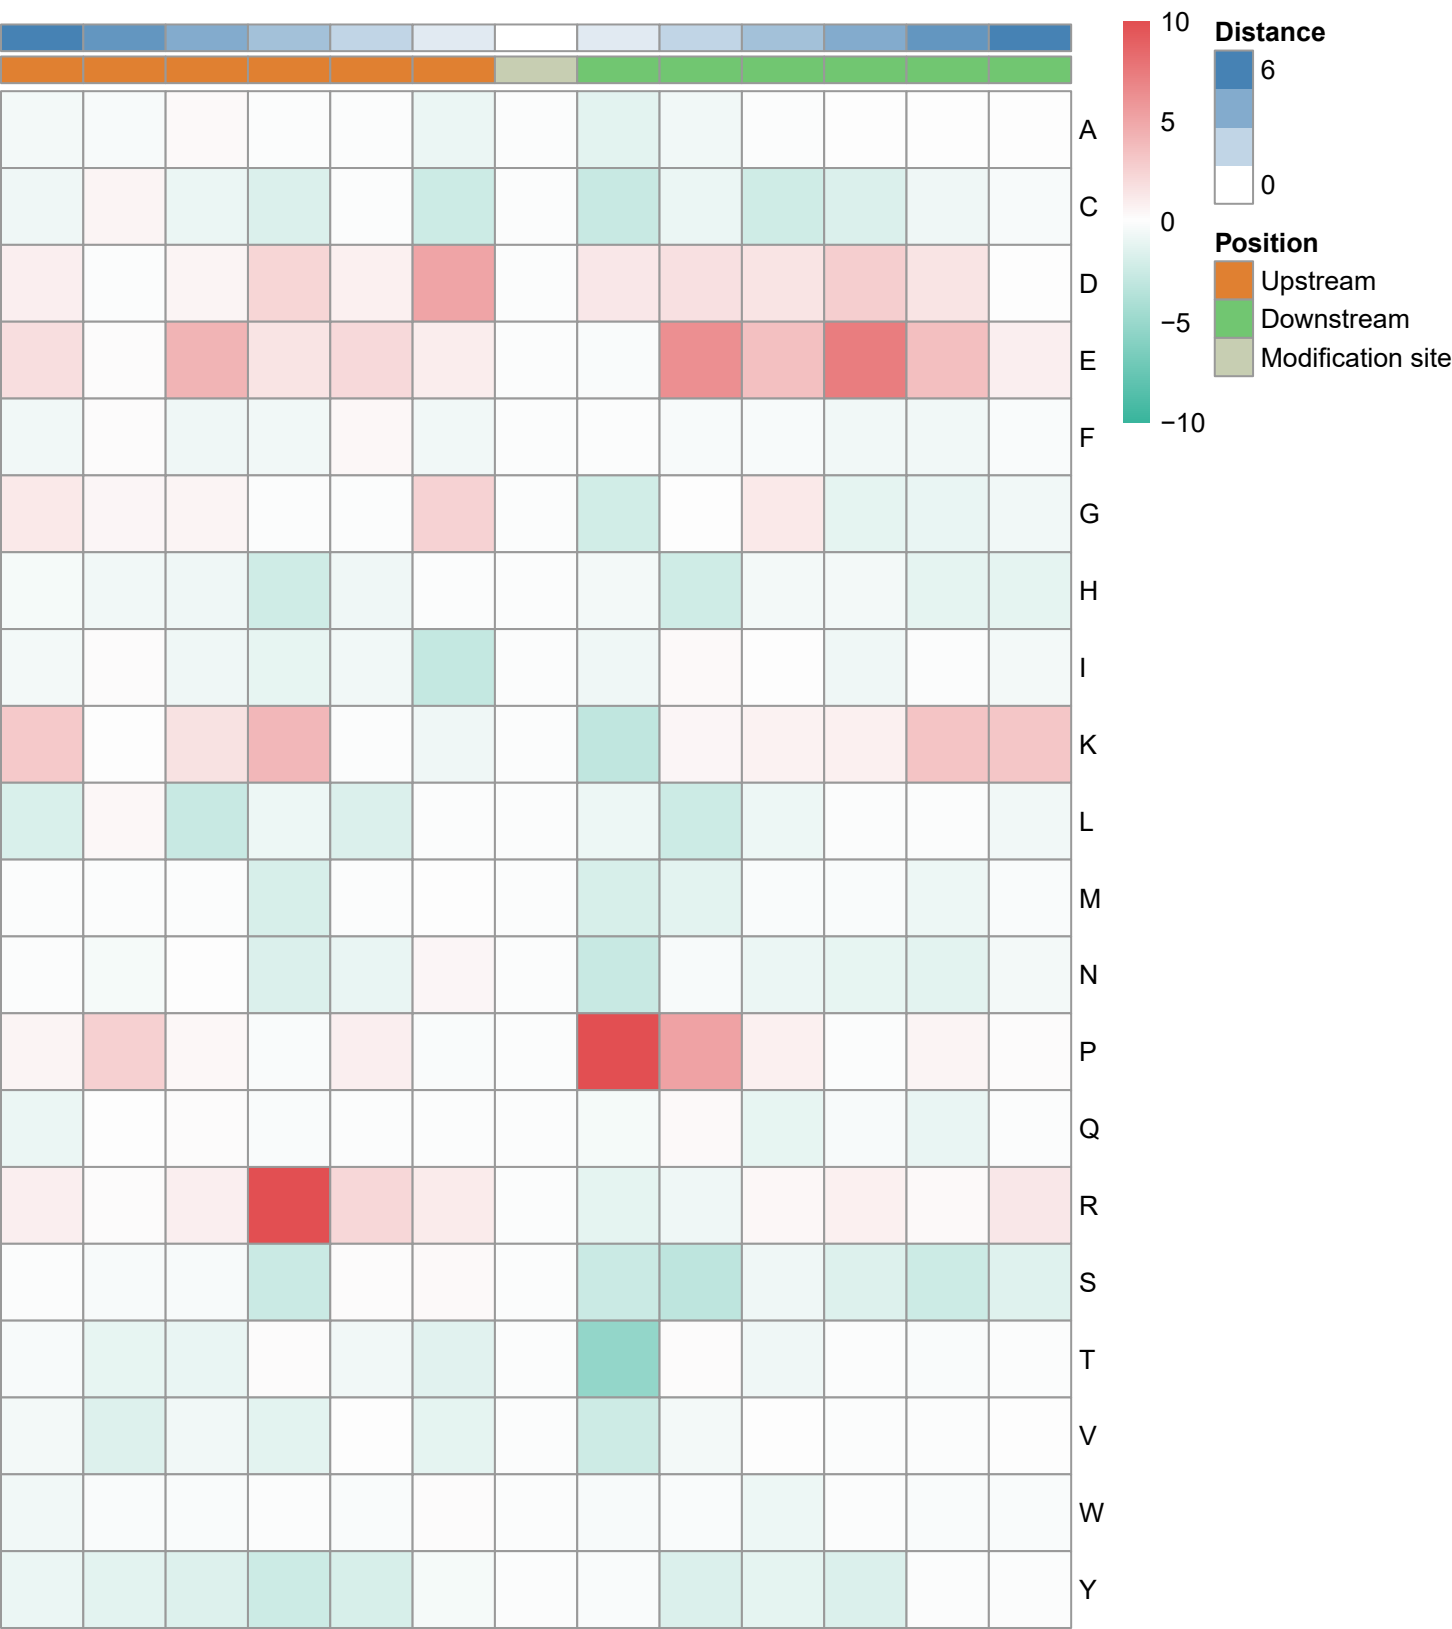

## PD vs D down S motif

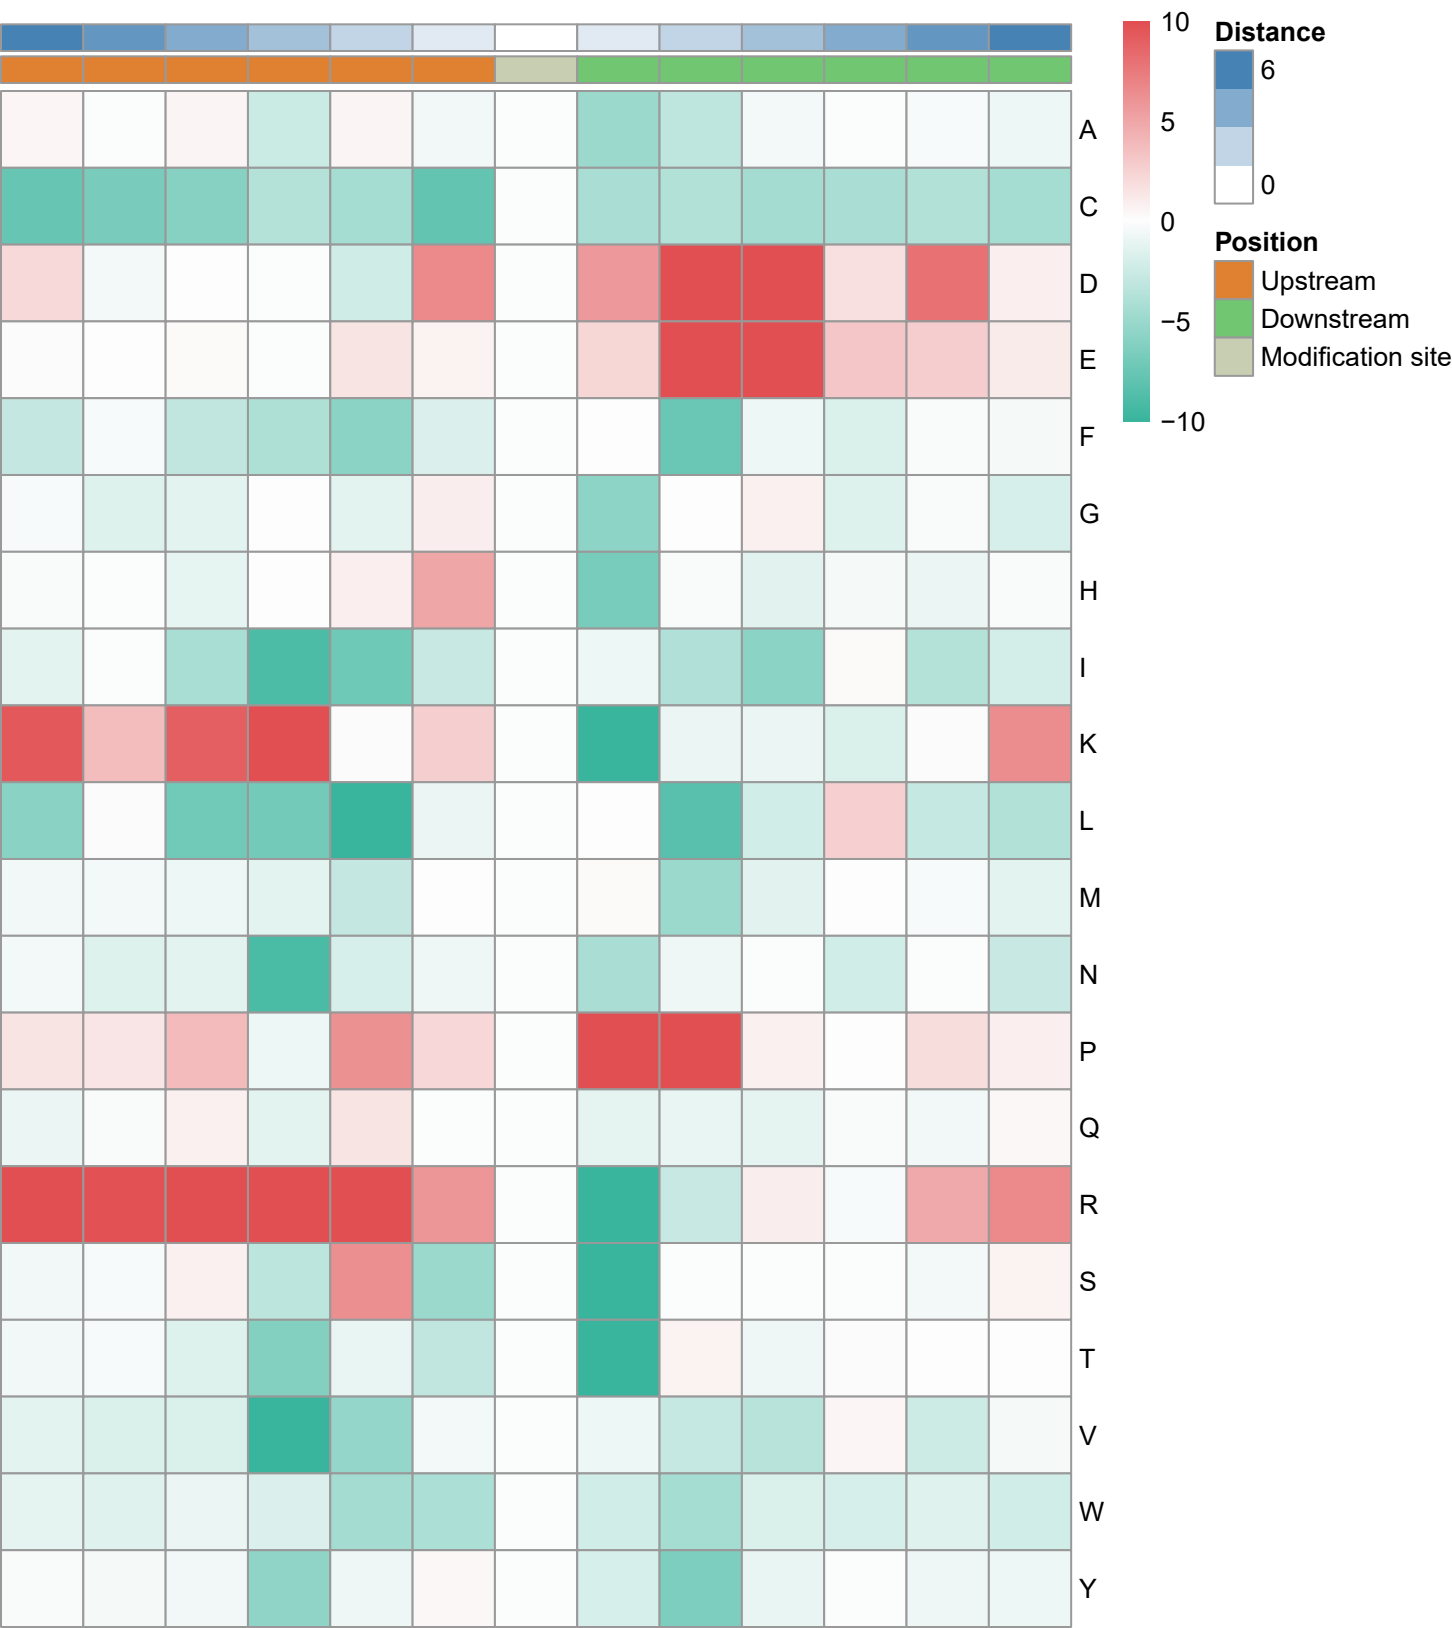

# PD vs D down T motif

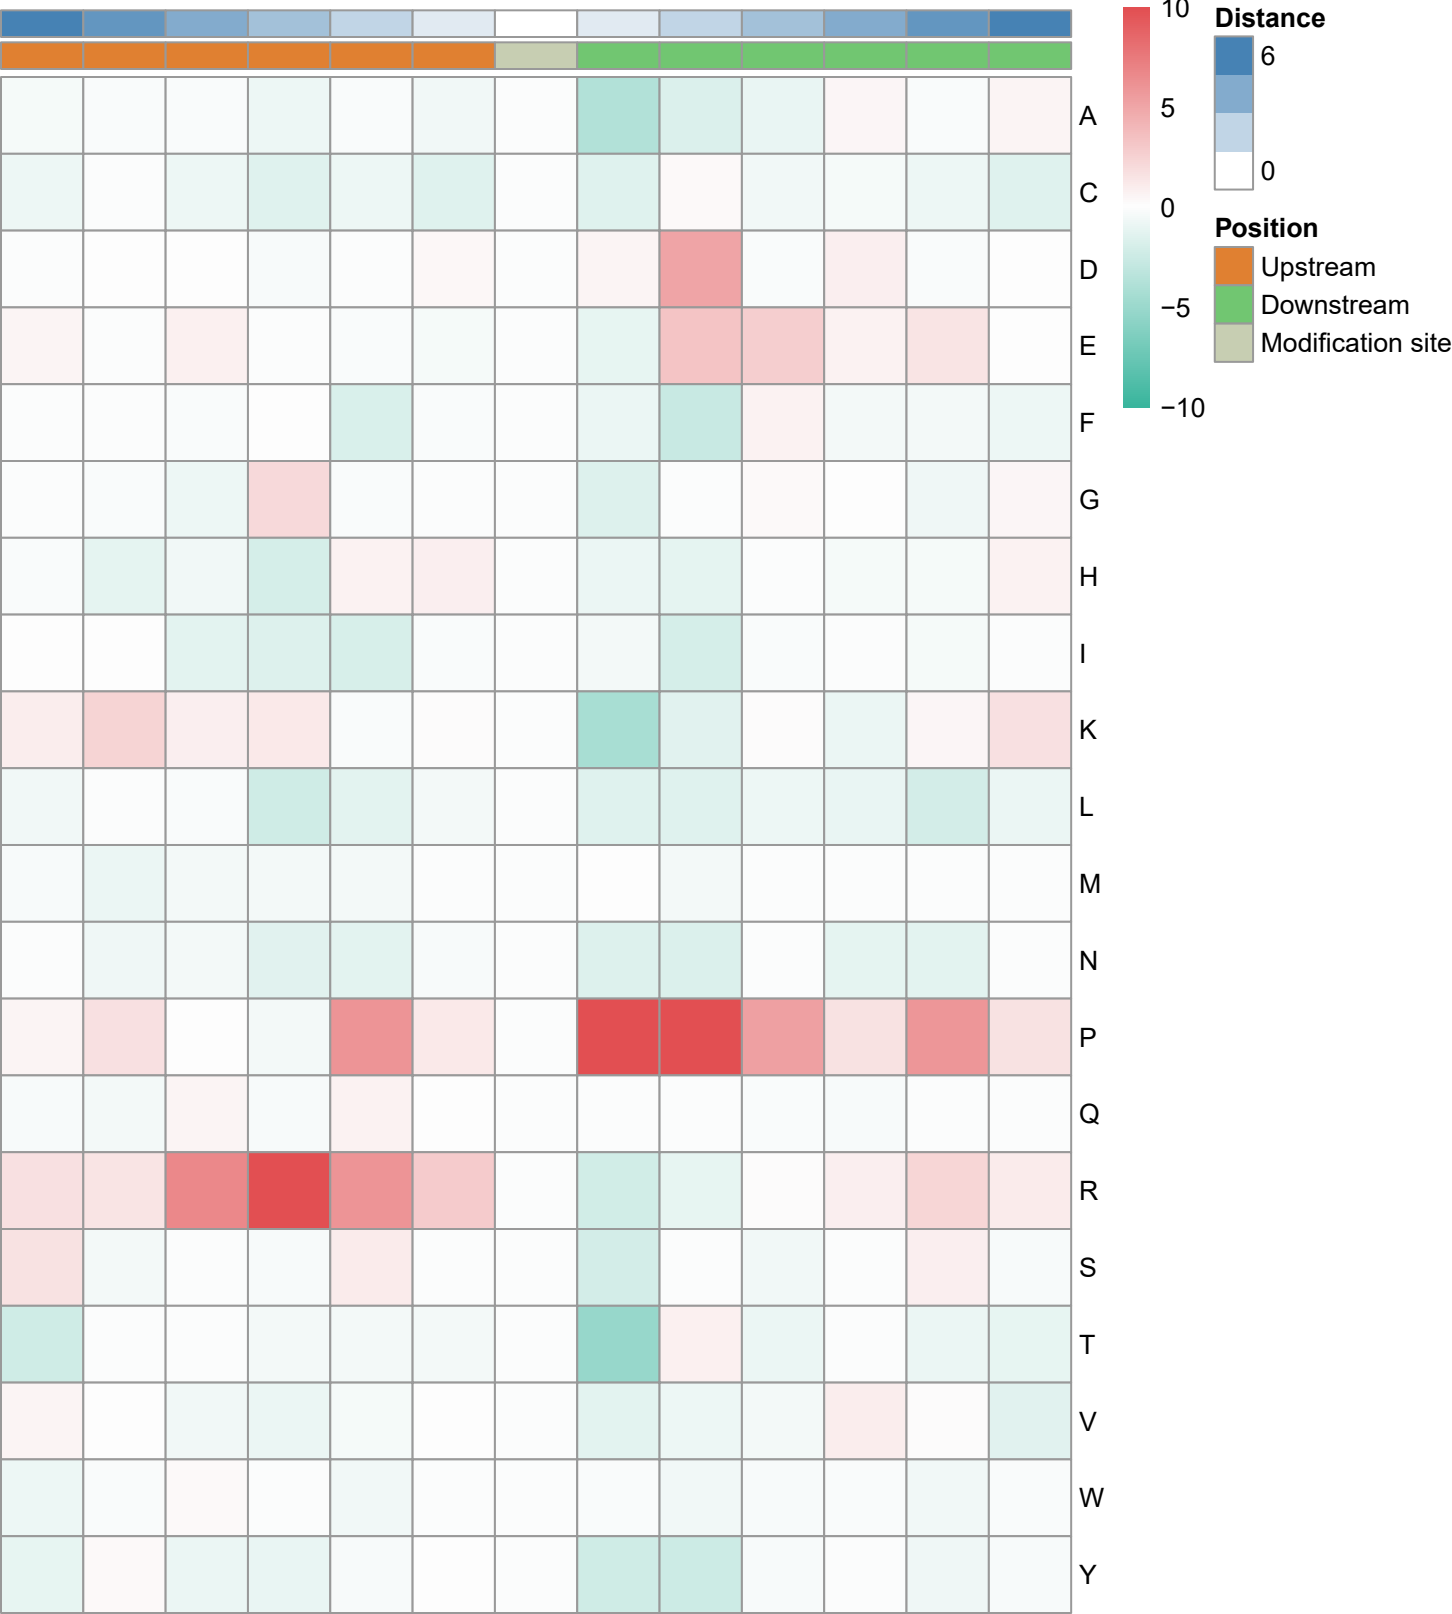

## FPD vs PD up S motif

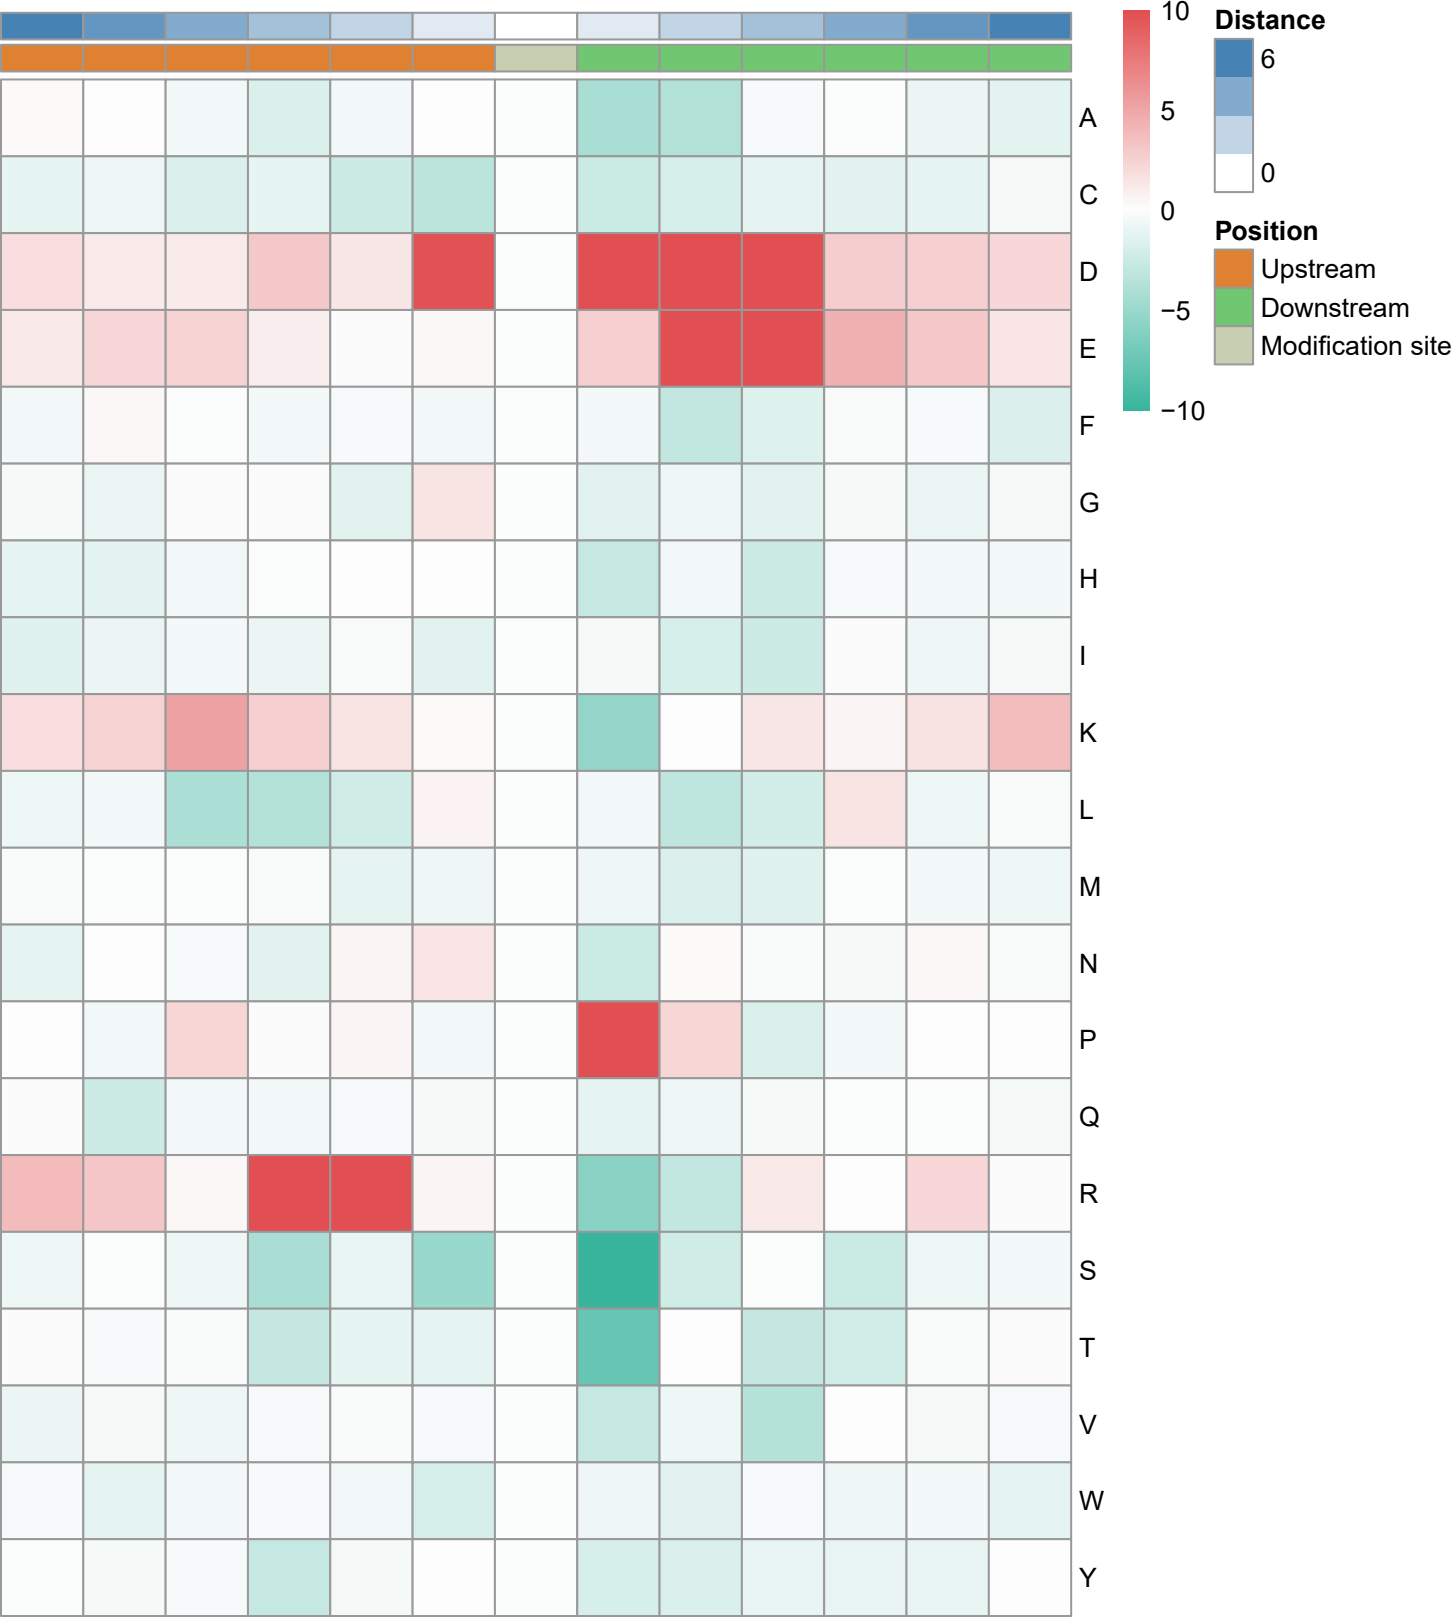

# FPD vs PD up T motif

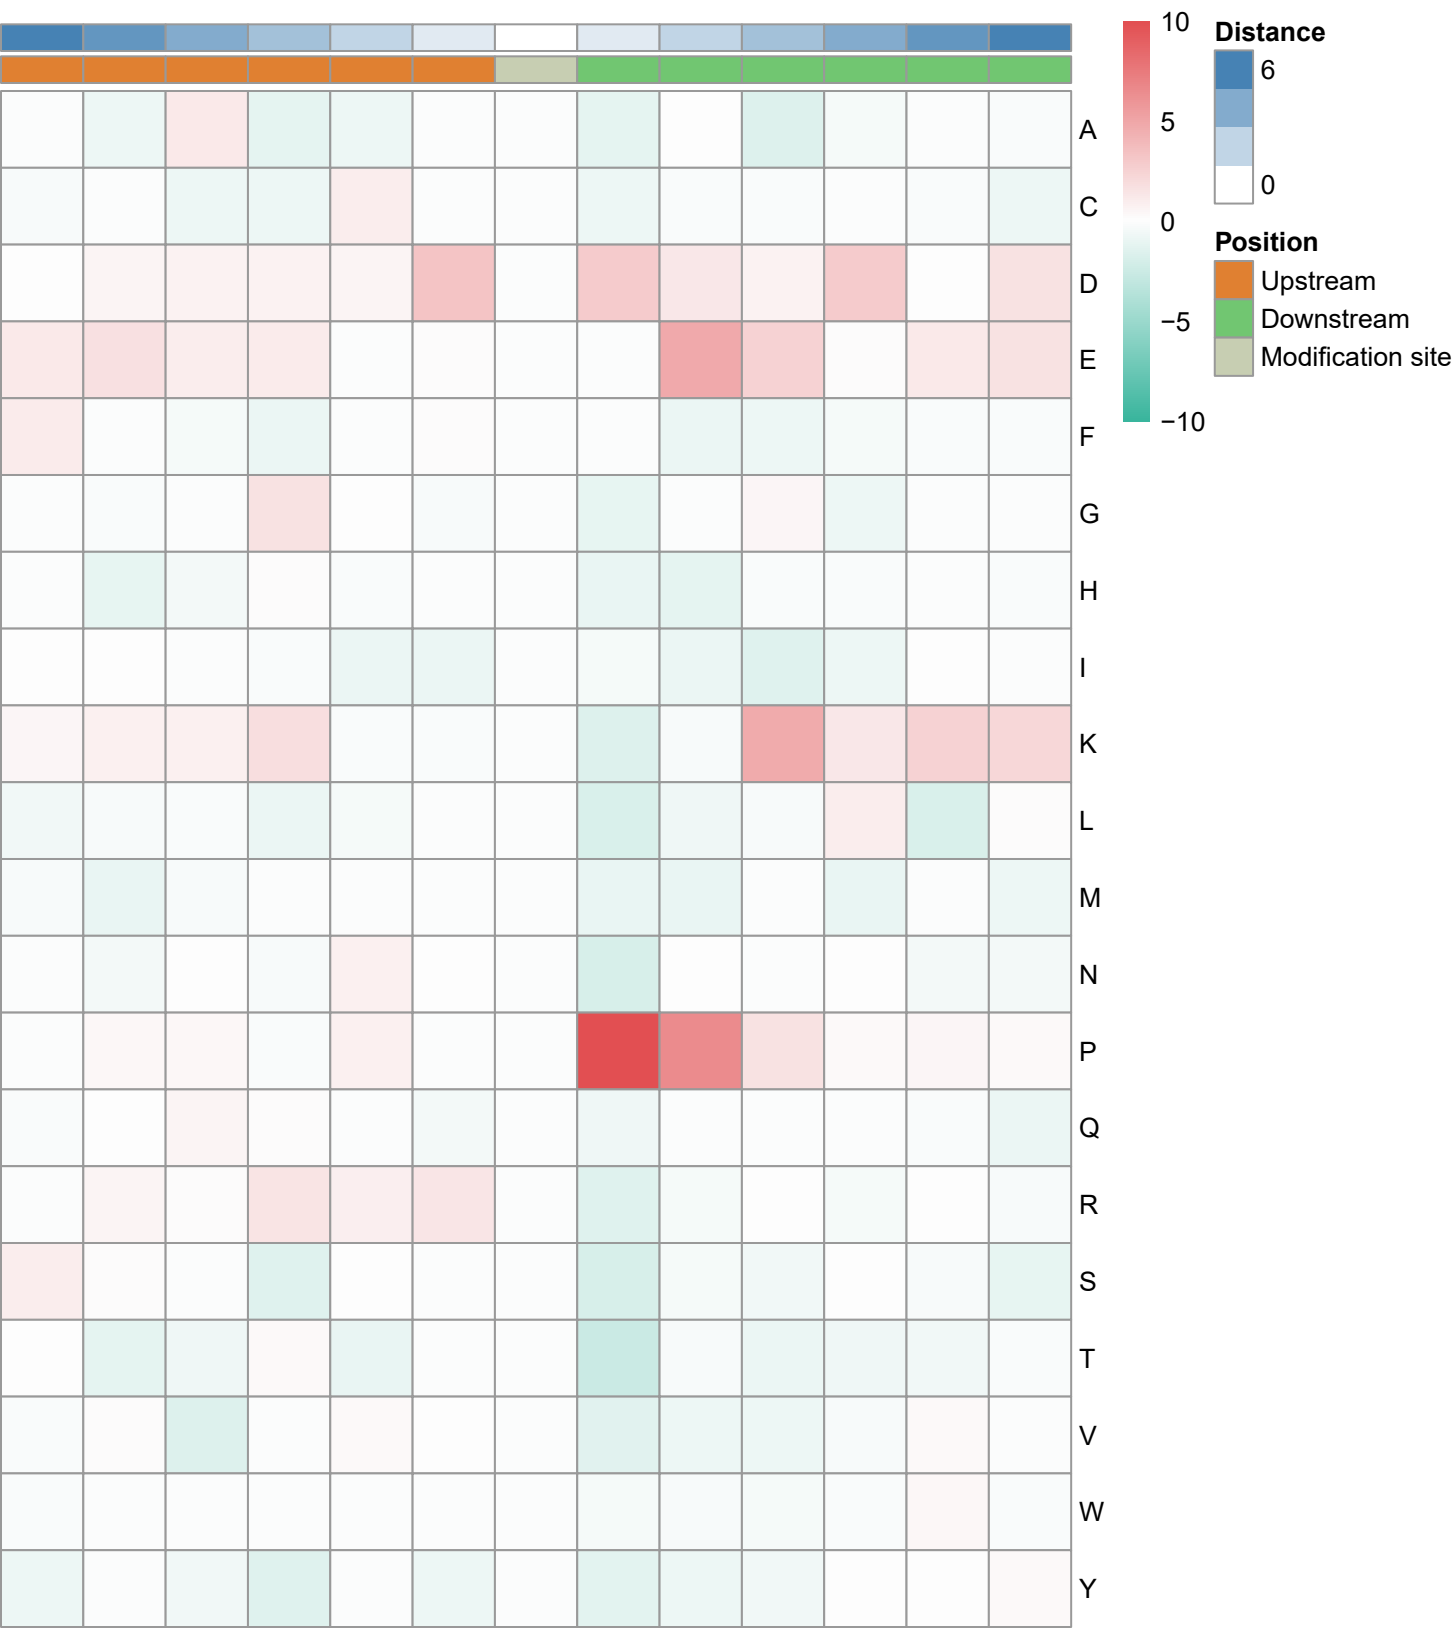

## FPD vs PD down S motif

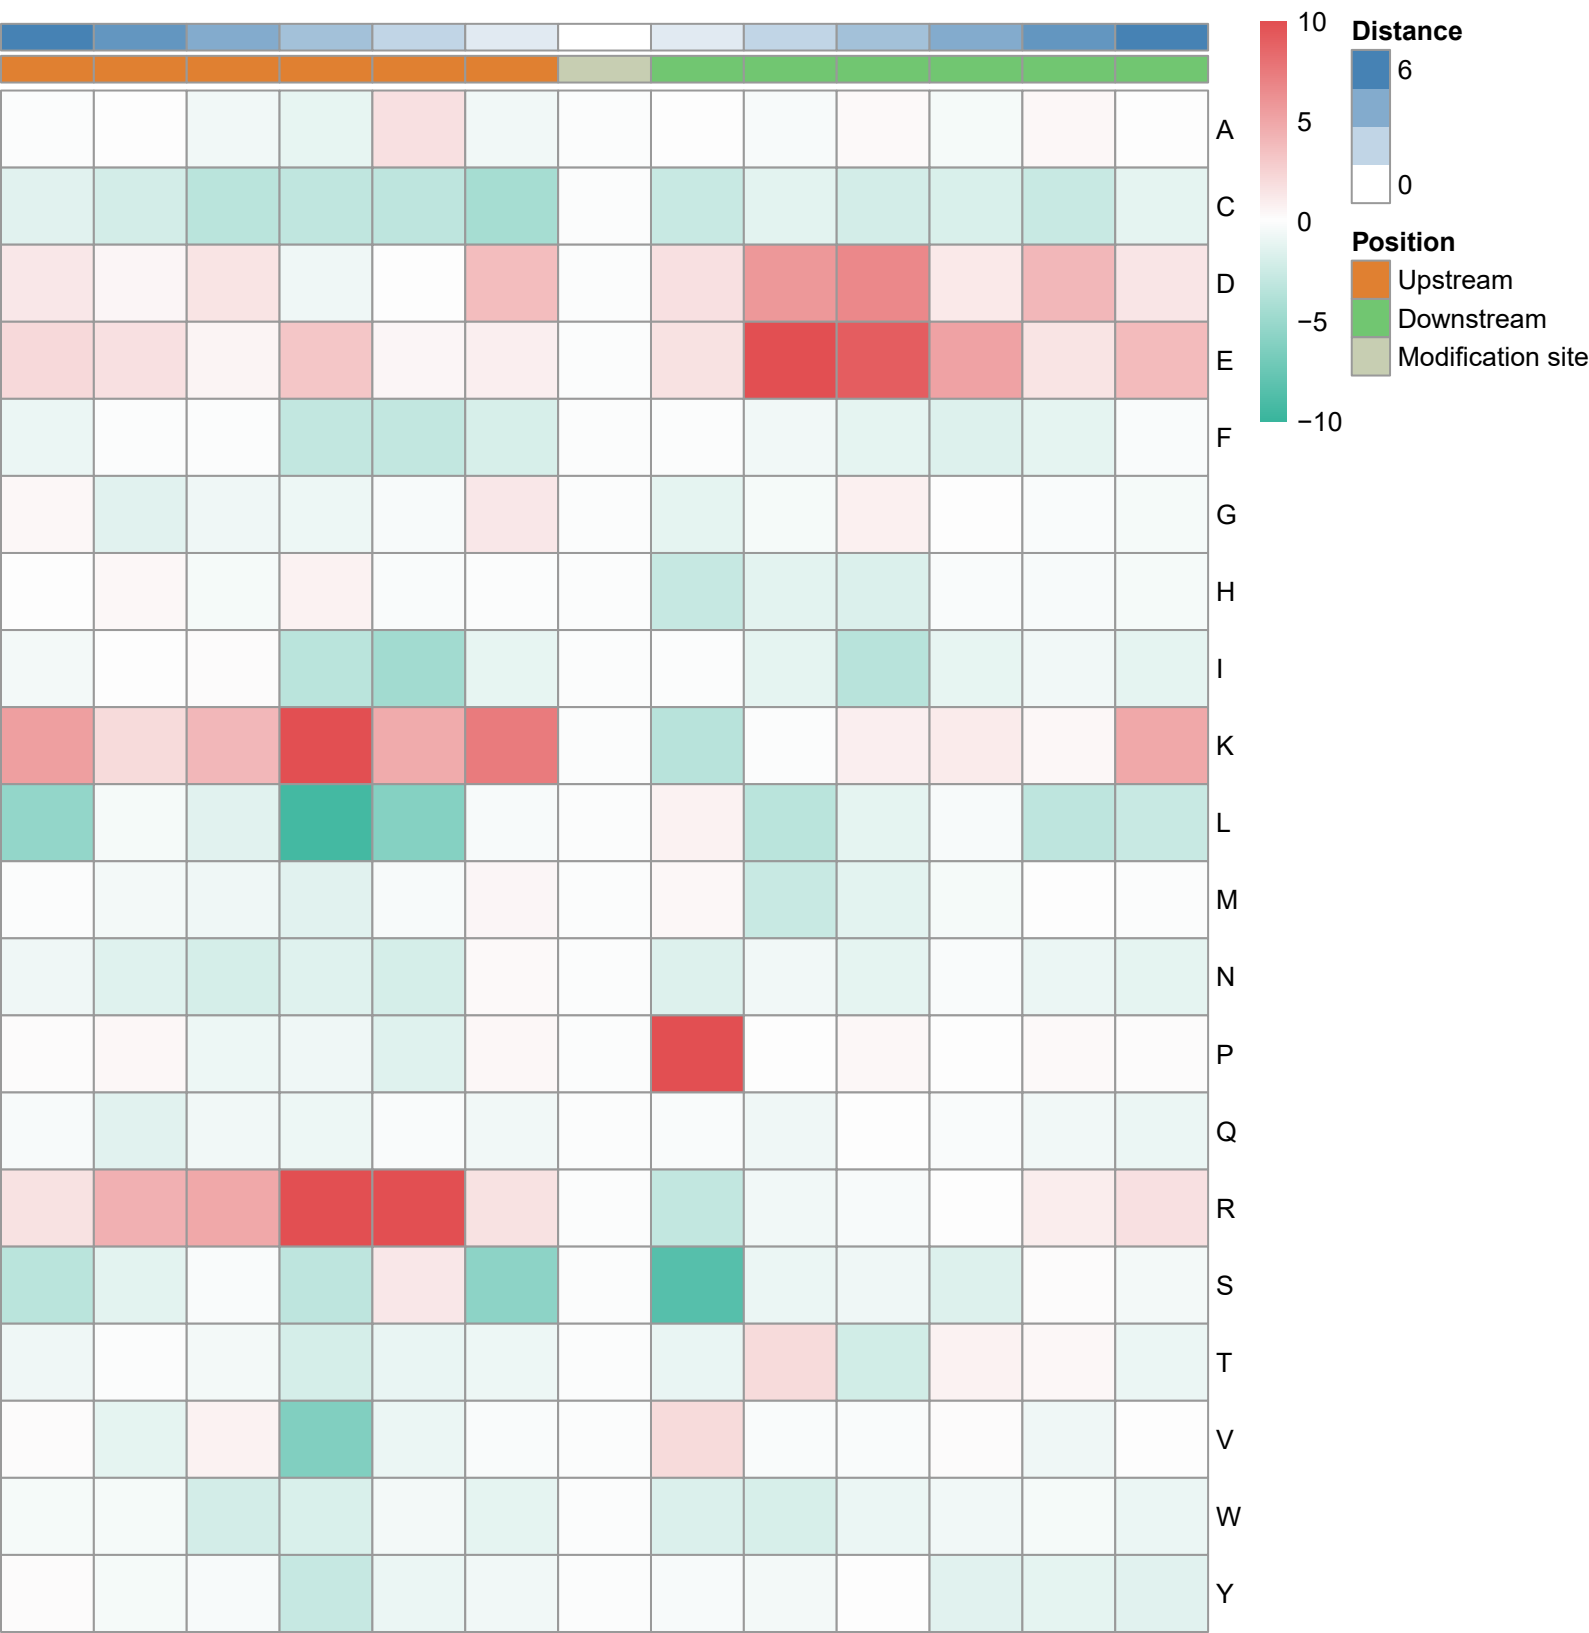

## FPD vs PD down T motif

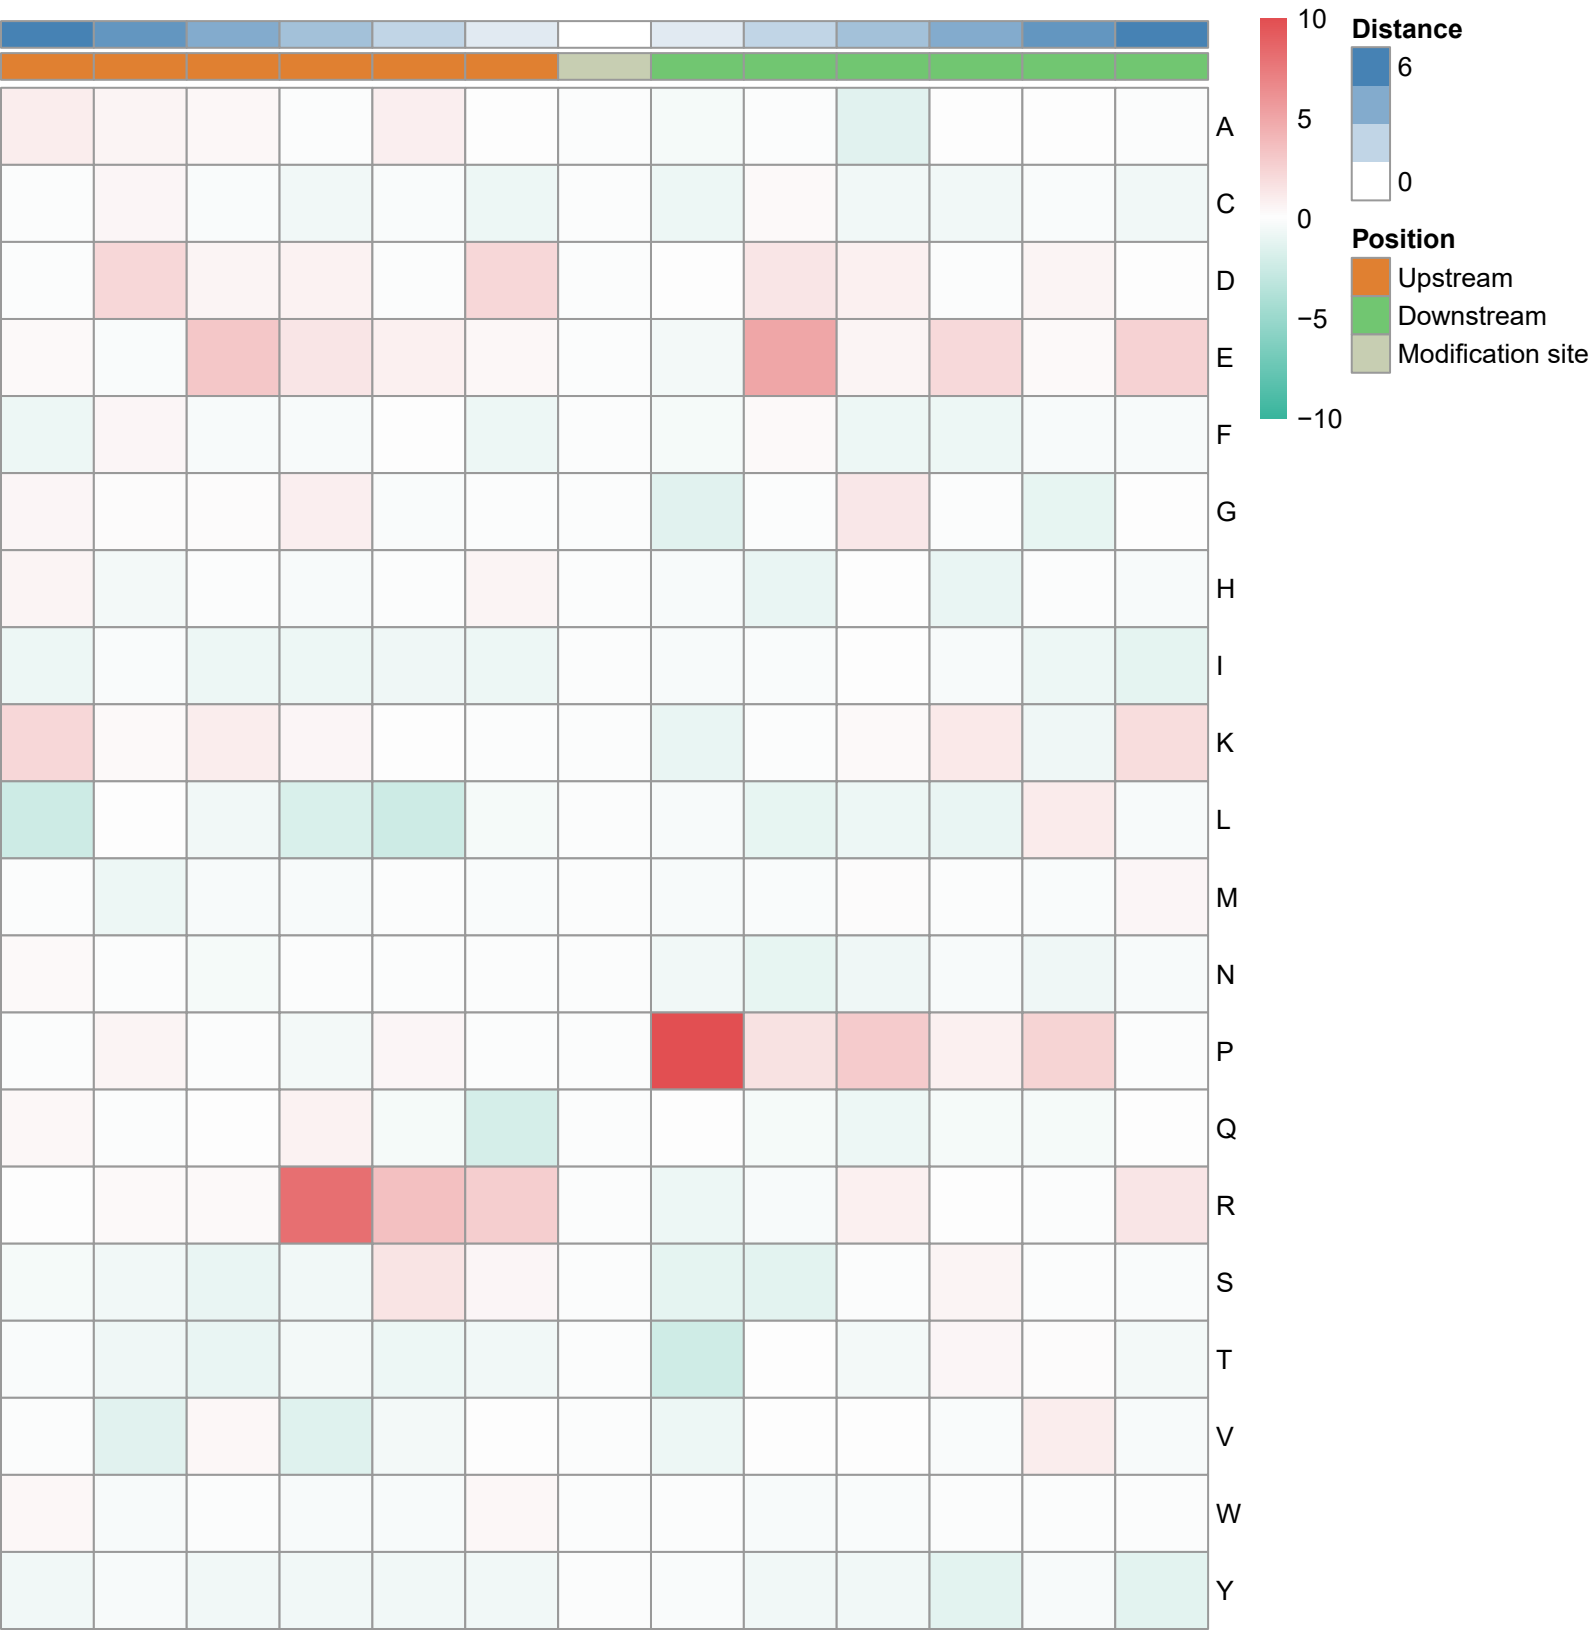



## FPD vs D up S motif

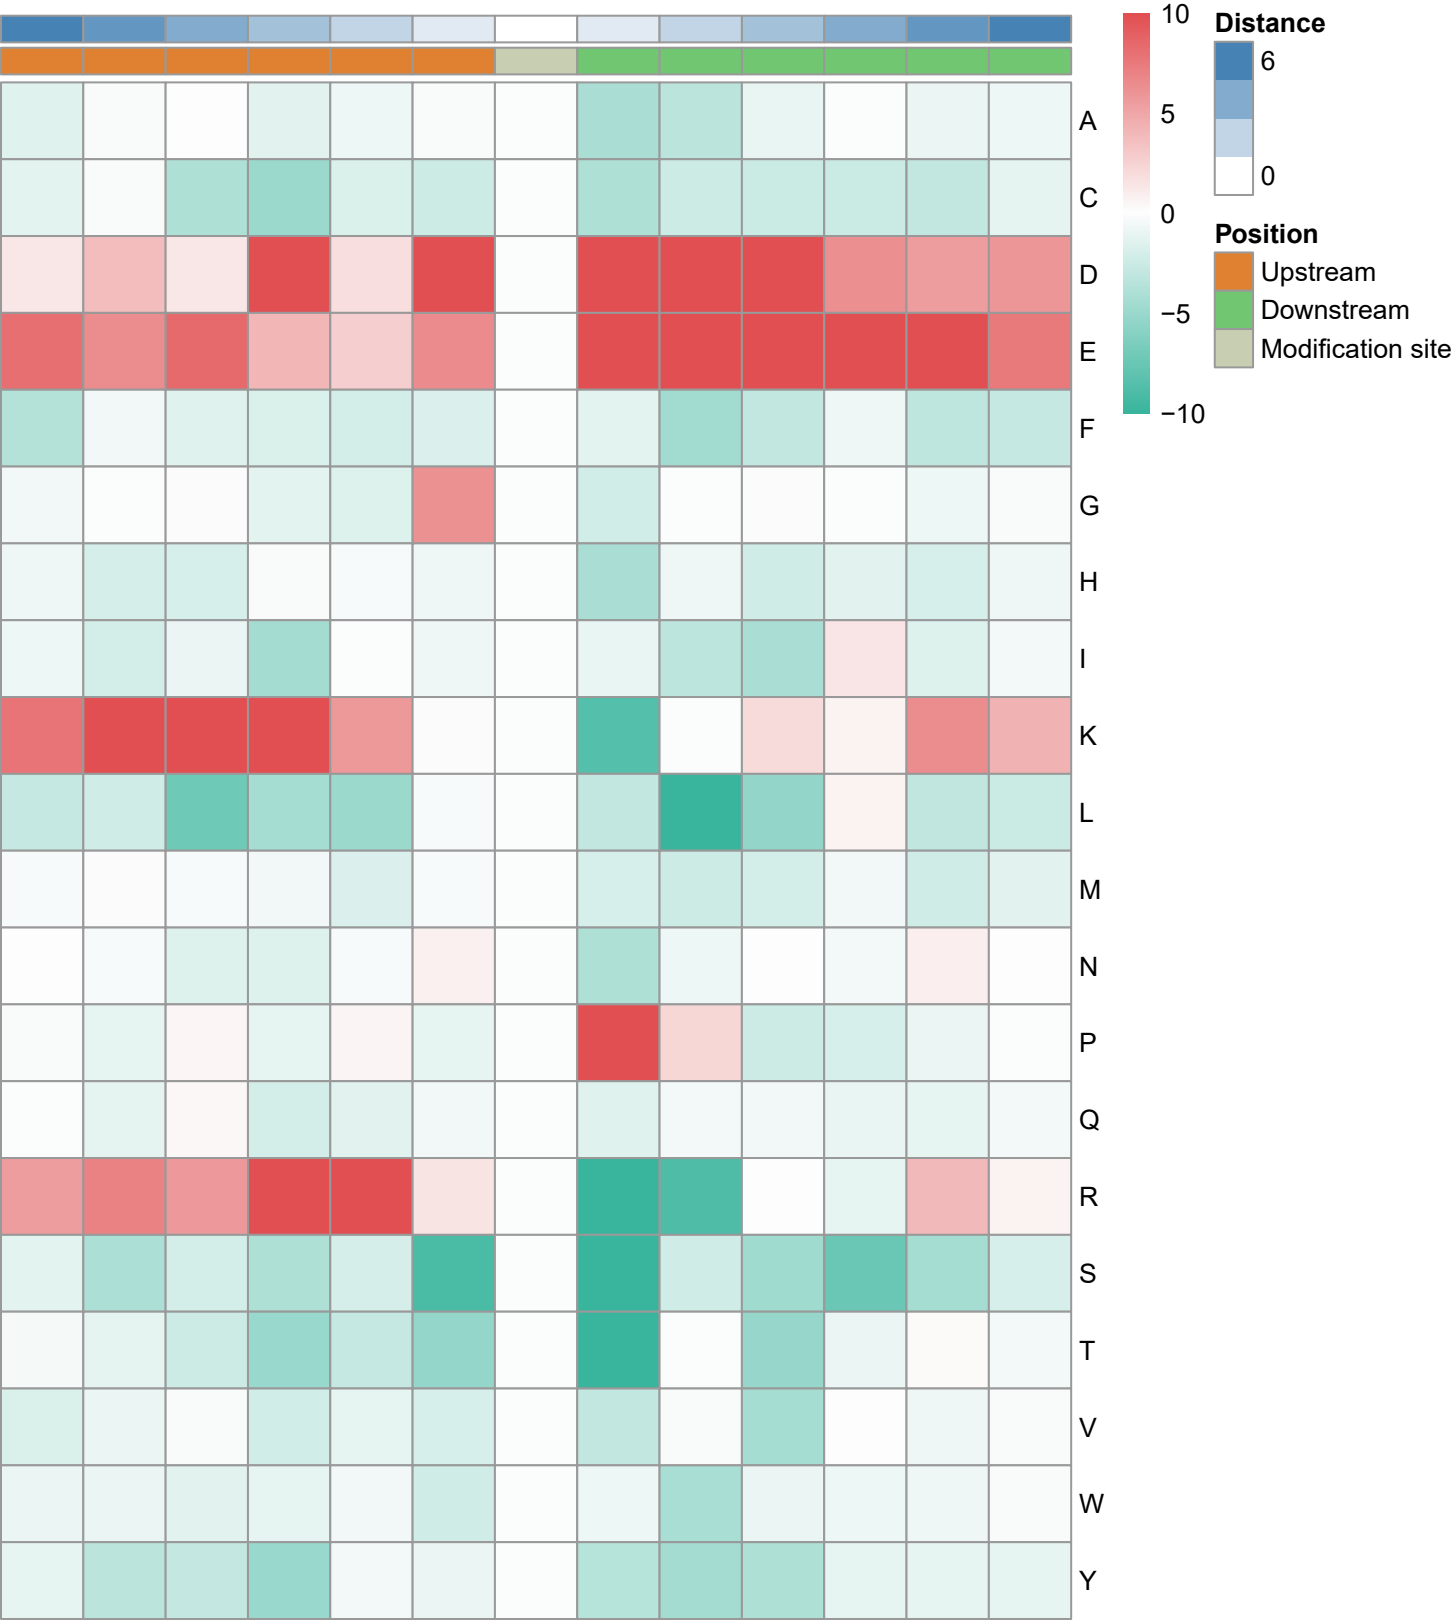

# FPD vs D up T motif

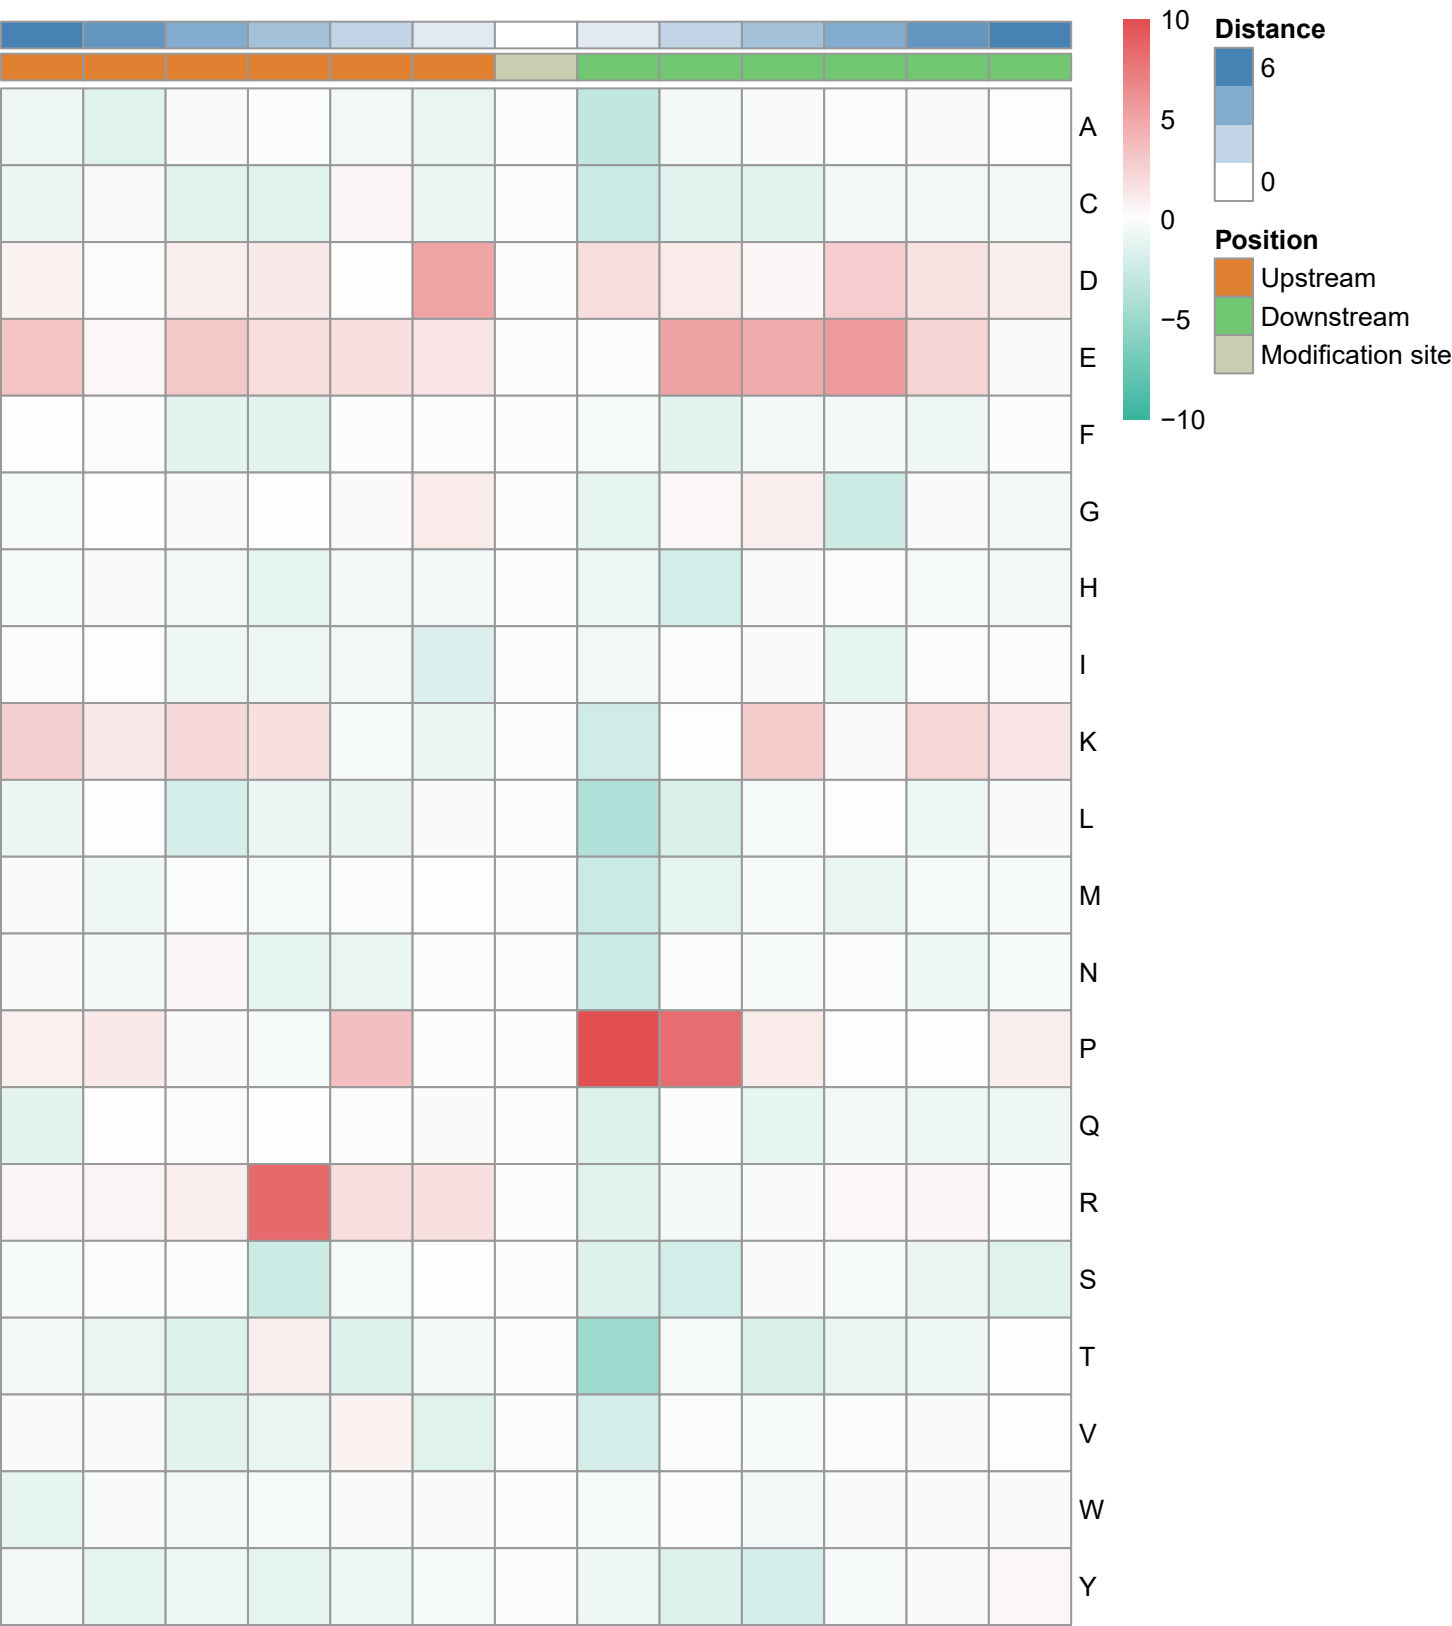

# FPD vs D down S motif

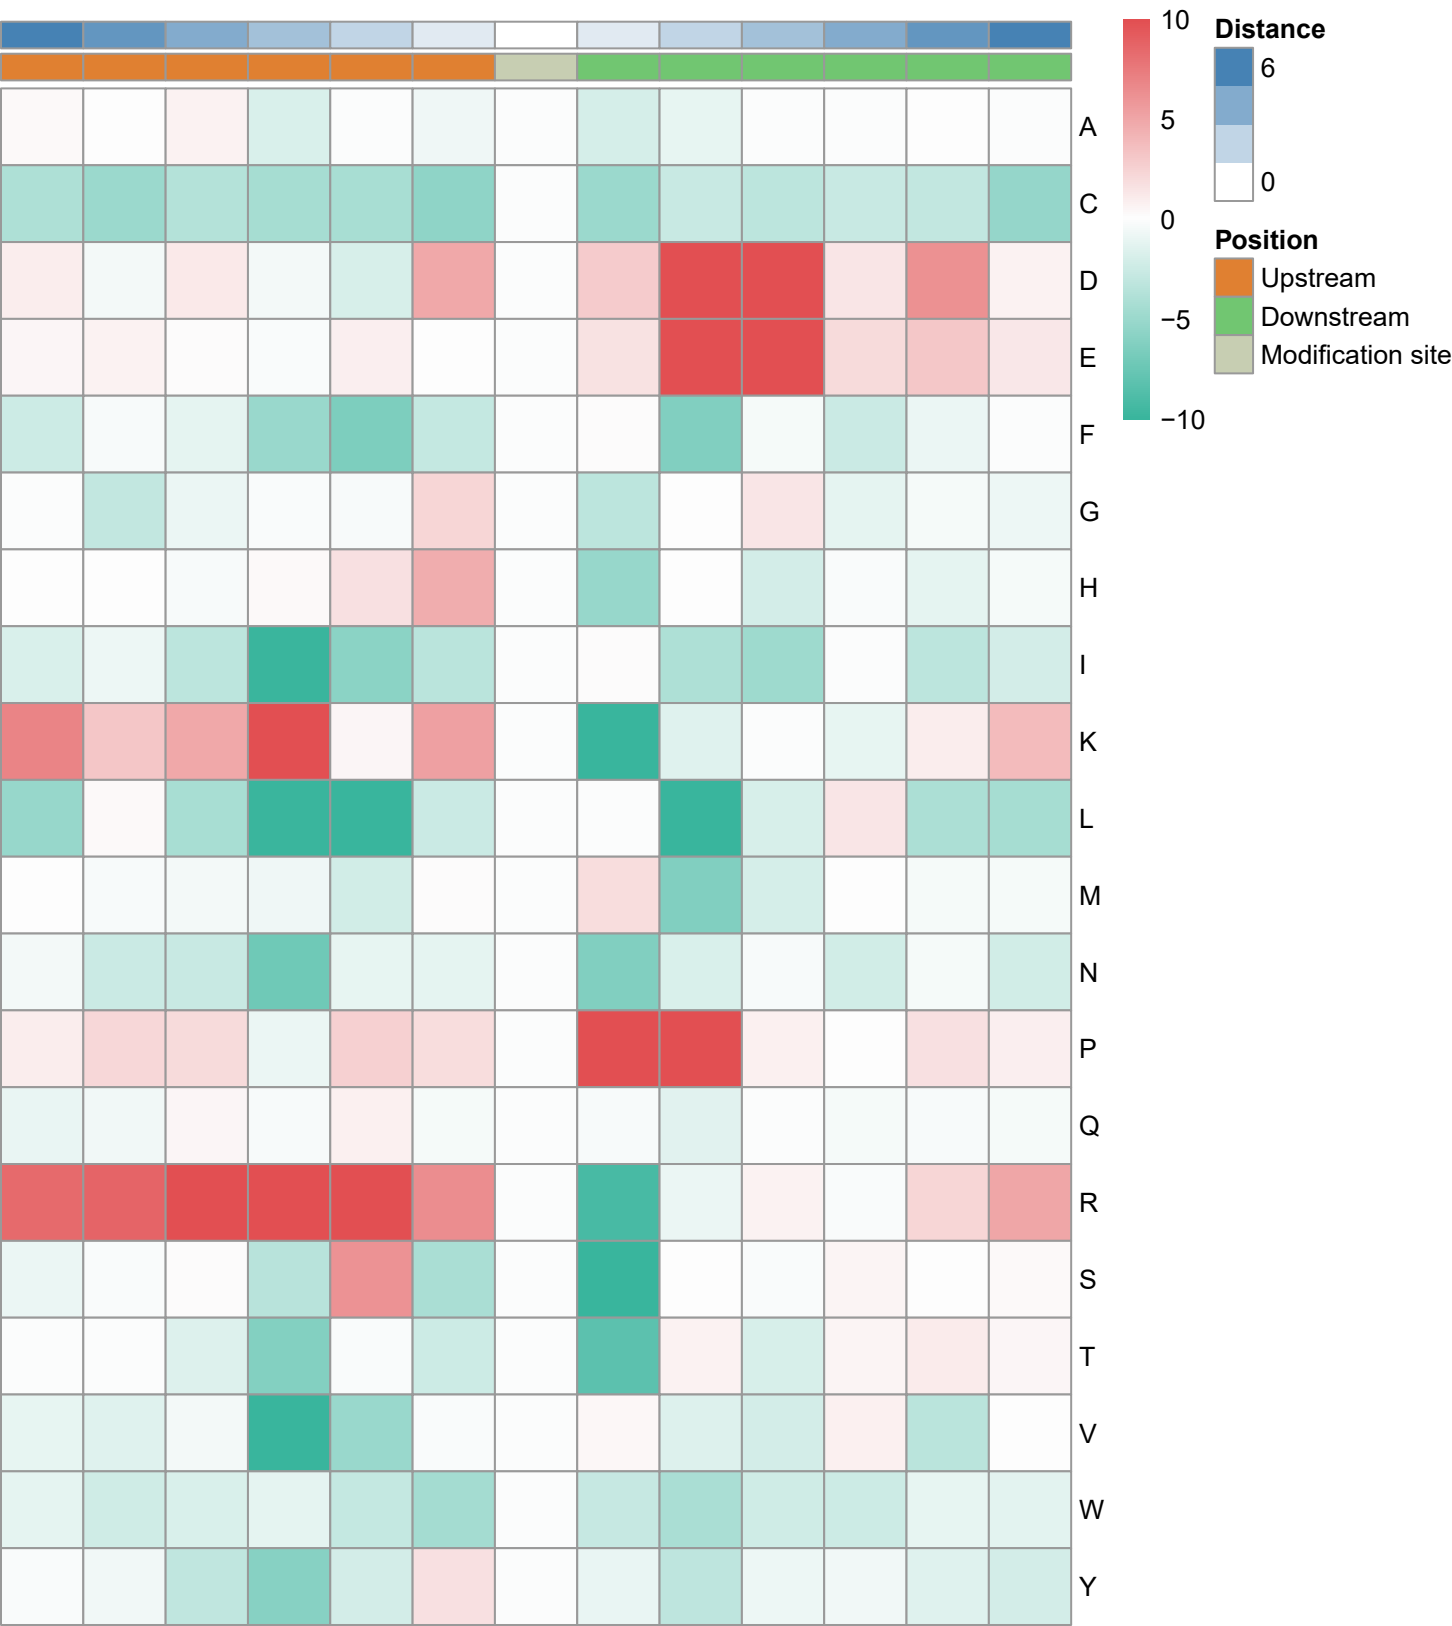

# FPD vs D down T motif

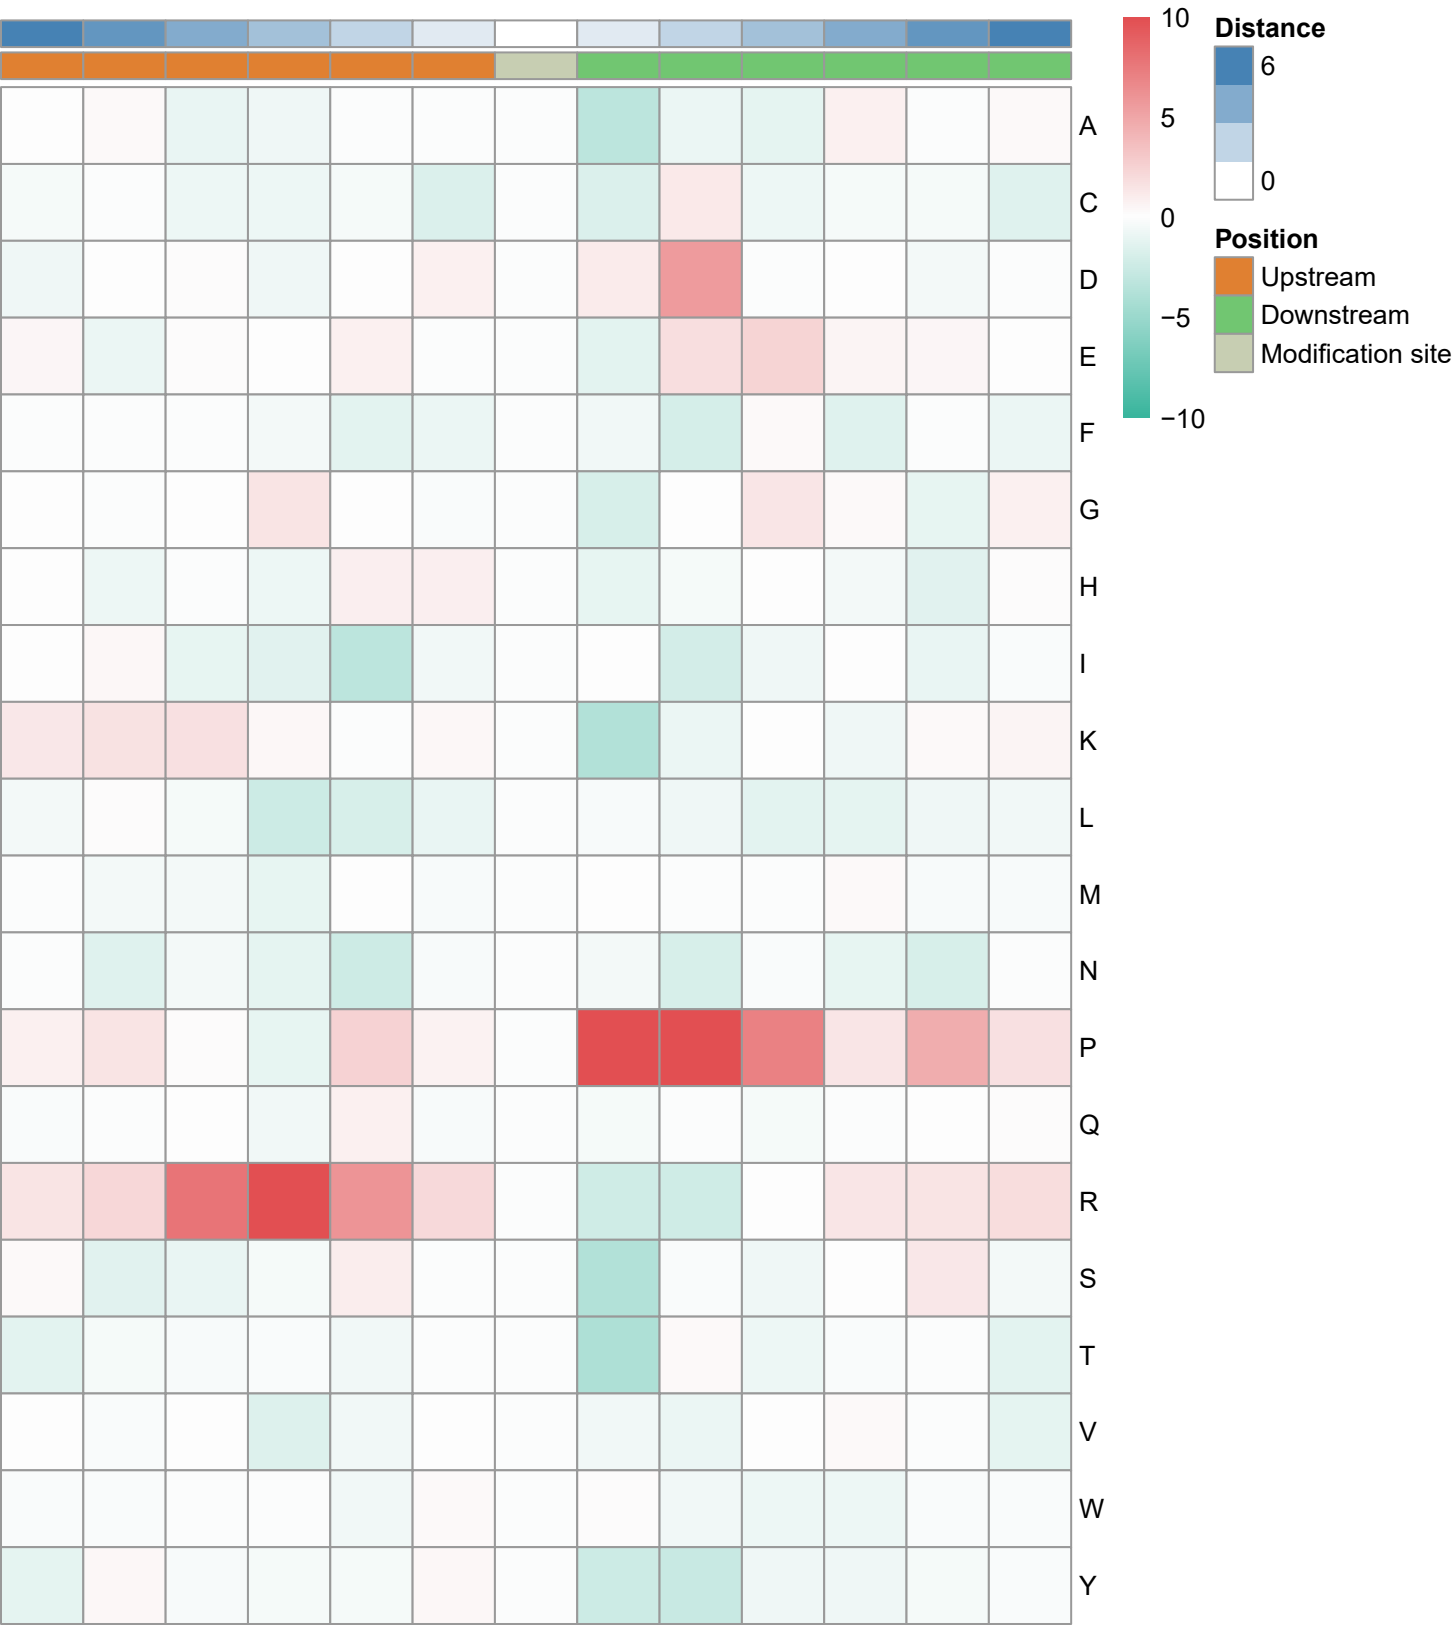

Supplement: s1 [file s1]
